# Supplementary material for: Palladium-catalyzed oxidative cycloaddition of 1-indanones and internal aryl alkynes toward benzo[c]fluorenone derivatives
Source: Royal Society of Chemistry journal article supplement (doi:10.1039/d4cc06591c), 2025-01-01

## **Palladium-Catalyzed Oxidative Cycloaddition of 1-Indanones and Internal Aryl Alkynes toward Benzo[c]fluorenone Derivatives**

### **Table of Contents**

|                                                                                                                                                                 |       |
|-----------------------------------------------------------------------------------------------------------------------------------------------------------------|-------|
| General Methods and Materials.....                                                                                                                              | 2     |
| Preparation of Internal Alkynes.....                                                                                                                            | 3-4   |
| Screening of Reaction Conditions.....                                                                                                                           | 5-6   |
| General Catalytic Procedure for Palladium-Catalyzed Oxidative Cycloaddition of 1-Indanones and Internal Aryl Alkynes toward Benzo[c]fluorenone Derivatives..... | 7     |
| Procedure Gram-scale for the Synthesis of <b>3a</b> .....                                                                                                       | 8     |
| Mechanistic Study.....                                                                                                                                          | 9-20  |
| X-Ray Crystallographic Data.....                                                                                                                                | 21-22 |
| Characterization data for the products.....                                                                                                                     | 23-32 |
| References.....                                                                                                                                                 | 32-33 |
| Copies of <sup>1</sup> H and <sup>13</sup> C NMR spectra of products.....                                                                                       | 34-62 |

## General Methods and Materials

Pd(OAc)<sub>2</sub>, Pd(TFA)<sub>2</sub>, Pd(PPh<sub>3</sub>)<sub>4</sub>, Pd(acac)<sub>2</sub>, Pd(dba)<sub>2</sub>, Pd<sub>2</sub>(dba)<sub>3</sub>, PdCl<sub>2</sub>, Cu(OAc)<sub>2</sub>·H<sub>2</sub>O, BQ, TEMPO, Ag<sub>2</sub>CO<sub>3</sub>, AgSbF<sub>6</sub>, AgOTf, AgNTf<sub>2</sub>, PPh<sub>3</sub>, PCy<sub>3</sub>, <sup>t</sup>BuXphos, Ruphos, Xphos, BINAP, Xantphos, DPPE, 1-indanones **1**, and 1-indenone were purchased from Energy Chemical and used without further purification. The synthesis of alkynes **2** used in this work were prepared according to the methods reported in literature.<sup>1</sup> Other chemicals were purchased from commercial suppliers, further dried and purified if necessary. The water used was re-distilled and ion-free. <sup>1</sup>H and <sup>13</sup>C NMR spectra were achieved on a Bruker AVANCE 400 MHz spectrometer (<sup>1</sup>H 400 MHz; <sup>13</sup>C 100 MHz) in CDCl<sub>3</sub>. Abbreviations for data quoted are *s*-singlet; *brs*-broad singlet; *d*-doublet; *t*-triplet; *dd*-doublet of doublets; *m*-multiplet. High-resolution mass spectra were measured on a Waters Micromass GCT facility. Thin-layer chromatographies were done on pre-coated silica gel 60F254 plates (Merck). Silica gel 60H (200-300 mesh) manufactured by Qingdao Haiyang Chemical Group Co. (China) was used for general chromatography. The X-ray diffraction data were collected on Xcalibur, Eos diffractometer.

## Preparation of Internal Alkynes

### preparation of internal aryl alkynes via Sonogashira coupling.<sup>1</sup>

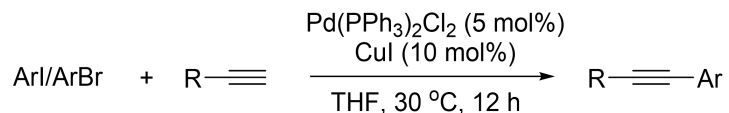

**A typical operation:** a dry schlenk flask was charged with aryl halide or vinyl halide (10.0 mmol), Pd(PPh<sub>3</sub>)<sub>2</sub>Cl<sub>2</sub> (5 mol%), CuI (10 mol%). The mixture was degassed under argon for three times. Et<sub>3</sub>N (20 mL) and the terminal alkyne (1.2 equiv) was then added. The mixture was stirred at 30 °C until all the aryl halide or vinyl halide was consumed. The reaction mixture was diluted with diethyl ether, washed with water and brine, dried over anhydrous MgSO<sub>4</sub>, and filtered. The filtrate was concentrated under vacuum. The residue was purified through silica gel flash chromatography.

1,2-Diphenylethyne (**2a**)<sup>1</sup>: a dry schlenk flask was charged with iodobenzene (10.0 mmol), Pd(PPh<sub>3</sub>)<sub>2</sub>Cl<sub>2</sub> (5 mol%), CuI (10 mol%). The mixture was degassed under argon for three times. Et<sub>3</sub>N (20 mL) and the ethynylbenzene (12.0 mmol, 1.2 equiv) was then added. The mixture was stirred at 30 °C until all the iodobenzene was consumed. The reaction mixture was diluted with diethyl ether, washed with water and brine, dried over anhydrous MgSO<sub>4</sub>, and filtered. The filtrate was concentrated under vacuum. The residue was purified through silica gel flash chromatography. Obtained as a gray solid (1673.2 mg, 94% yield), eluting with 1% EtOAc in PE (elution gradient); <sup>1</sup>H NMR (400 MHz, CDCl<sub>3</sub>) δ 7.53 - 7.55 (m, 4H), 7.30 - 7.37 (m, 6H); <sup>13</sup>C NMR (101 MHz, CDCl<sub>3</sub>) δ 131.6, 128.32, 128.23, 123.2, 89.3.

**$^1\text{H}$  NMR (CDCl<sub>3</sub>, 400 MHz) and  $^{13}\text{C}$  NMR (101 MHz, CDCl<sub>3</sub>) Spectrum of **2a****

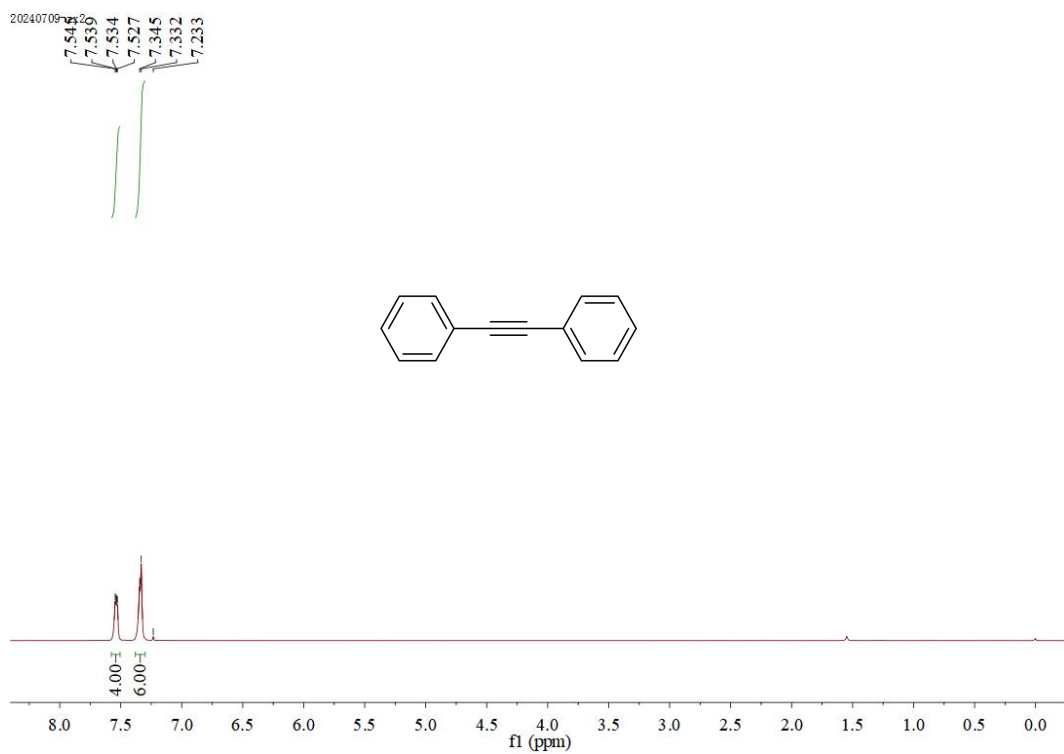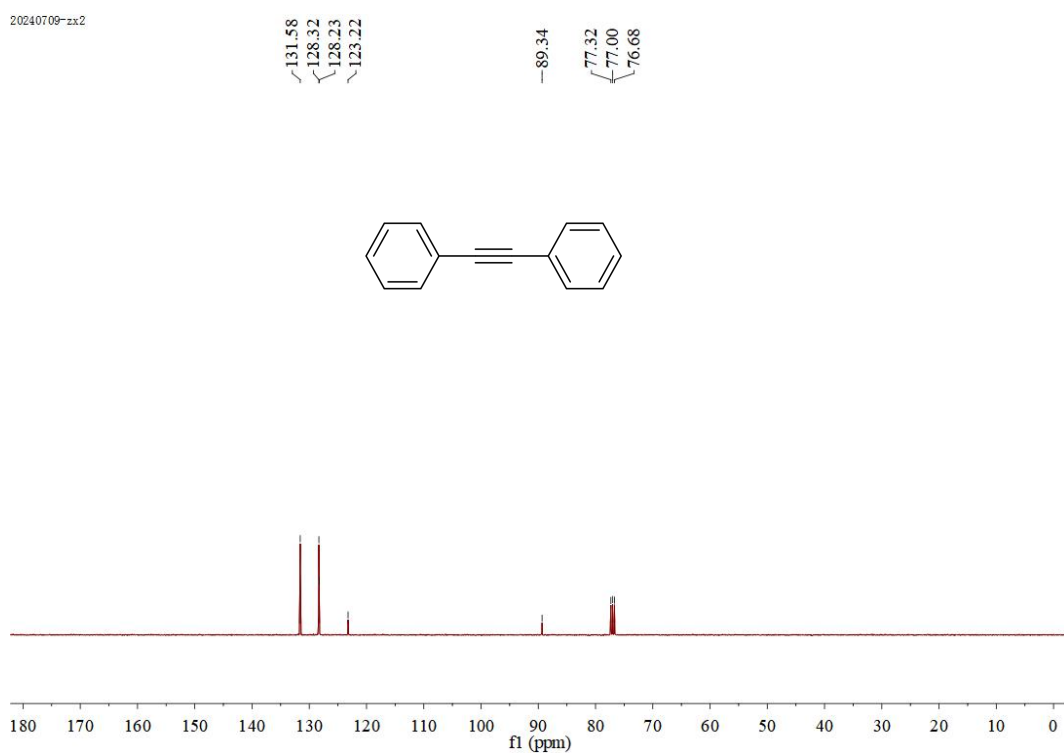

## Screening of Reaction Conditions<sup>a</sup>

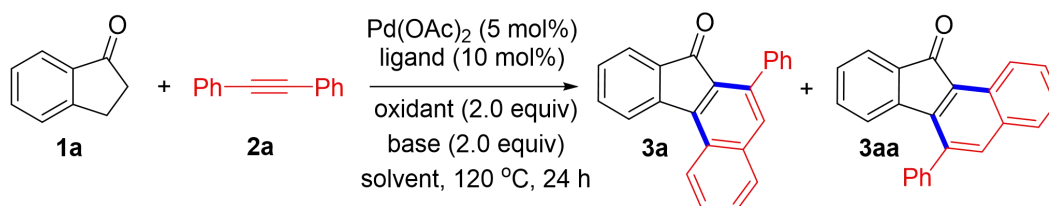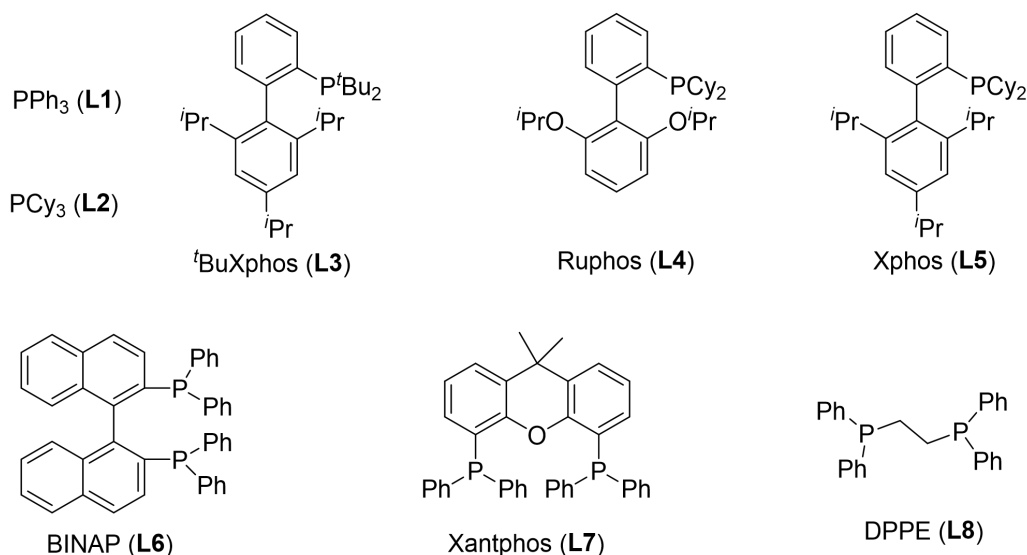

| entry           | catalyst                   | Ligand    | oxidant                                | base                               | solvent        | yield(%) <sup>b</sup><br>( <b>3a/3aa</b> ) |
|-----------------|----------------------------|-----------|----------------------------------------|------------------------------------|----------------|--------------------------------------------|
| 1               | Pd(OAc) <sub>2</sub>       | L1        | Cu(OAc) <sub>2</sub>                   | K <sub>2</sub> CO <sub>3</sub>     | toluene        | 41 (3/1)                                   |
| 2               | Pd(OAc) <sub>2</sub>       | L2        | Cu(OAc) <sub>2</sub>                   | K <sub>2</sub> CO <sub>3</sub>     | toluene        | 62 (>10/1)                                 |
| 3               | Pd(OAc) <sub>2</sub>       | L3        | Cu(OAc) <sub>2</sub>                   | K <sub>2</sub> CO <sub>3</sub>     | toluene        | 52 (>5/1)                                  |
| 4               | Pd(OAc) <sub>2</sub>       | L4        | Cu(OAc) <sub>2</sub>                   | K <sub>2</sub> CO <sub>3</sub>     | toluene        | 39 (>10/1)                                 |
| <b>5</b>        | <b>Pd(OAc)<sub>2</sub></b> | <b>L5</b> | <b>Cu(OAc)<sub>2</sub></b>             | <b>K<sub>2</sub>CO<sub>3</sub></b> | <b>toluene</b> | <b>71 (&gt;20/1)</b>                       |
| 6               | Pd(OAc) <sub>2</sub>       | L6        | Cu(OAc) <sub>2</sub>                   | K <sub>2</sub> CO <sub>3</sub>     | toluene        | trace                                      |
| 7               | Pd(OAc) <sub>2</sub>       | L7        | Cu(OAc) <sub>2</sub>                   | K <sub>2</sub> CO <sub>3</sub>     | toluene        | trace                                      |
| 8               | Pd(OAc) <sub>2</sub>       | L8        | Cu(OAc) <sub>2</sub>                   | K <sub>2</sub> CO <sub>3</sub>     | toluene        | trace                                      |
| 9               | Pd(OAc) <sub>2</sub>       | L5        | Cu(OAc) <sub>2</sub> ·H <sub>2</sub> O | K <sub>2</sub> CO <sub>3</sub>     | toluene        | 70 (>20/1)                                 |
| 10              | Pd(OAc) <sub>2</sub>       | L5        | BQ                                     | K <sub>2</sub> CO <sub>3</sub>     | toluene        | 0                                          |
| 11              | Pd(OAc) <sub>2</sub>       | L5        | TEMPO                                  | K <sub>2</sub> CO <sub>3</sub>     | toluene        | 50 (2/1)                                   |
| 12              | Pd(OAc) <sub>2</sub>       | L5        | Ag <sub>2</sub> CO <sub>3</sub>        | K <sub>2</sub> CO <sub>3</sub>     | toluene        | trace                                      |
| 13              | Pd(OAc) <sub>2</sub>       | L5        | AgSbF <sub>6</sub>                     | K <sub>2</sub> CO <sub>3</sub>     | toluene        | trace                                      |
| 14              | Pd(OAc) <sub>2</sub>       | L5        | AgOTf                                  | K <sub>2</sub> CO <sub>3</sub>     | toluene        | trace                                      |
| 15              | Pd(OAc) <sub>2</sub>       | L5        | AgNTf <sub>2</sub>                     | K <sub>2</sub> CO <sub>3</sub>     | toluene        | trace                                      |
| 16 <sup>c</sup> | Pd(OAc) <sub>2</sub>       | L5        | Cu(OAc) <sub>2</sub> (1.0)             | K <sub>2</sub> CO <sub>3</sub>     | toluene        | 44 (>10/1)                                 |
| 17 <sup>d</sup> | Pd(OAc) <sub>2</sub>       | L5        | Cu(OAc) <sub>2</sub> (3.0)             | K <sub>2</sub> CO <sub>3</sub>     | toluene        | 32 (>10/1)                                 |
| 18              | Pd(OAc) <sub>2</sub>       | L5        | Cu(OAc) <sub>2</sub>                   | CS <sub>2</sub> CO <sub>3</sub>    | toluene        | 61 (>20/1)                                 |
| 19              | Pd(OAc) <sub>2</sub>       | L5        | Cu(OAc) <sub>2</sub>                   | Na <sub>2</sub> CO <sub>3</sub>    | toluene        | 32 (>10/1)                                 |
| 20              | Pd(OAc) <sub>2</sub>       | L5        | Cu(OAc) <sub>2</sub>                   | NaOAc                              | toluene        | 37 (>10/1)                                 |

|                 |                                    |    |                      |                                 |                    |            |
|-----------------|------------------------------------|----|----------------------|---------------------------------|--------------------|------------|
| 21              | Pd(OAc) <sub>2</sub>               | L5 | Cu(OAc) <sub>2</sub> | K <sub>3</sub> PO <sub>4</sub>  | toluene            | 62 (>10/1) |
| 22              | Pd(OAc) <sub>2</sub>               | L5 | Cu(OAc) <sub>2</sub> | K <sub>2</sub> HPO <sub>4</sub> | toluene            | trace      |
| 23              | Pd(OAc) <sub>2</sub>               | L5 | Cu(OAc) <sub>2</sub> | NaH                             | toluene            | trace      |
| 24              | Pd(OAc) <sub>2</sub>               | L5 | Cu(OAc) <sub>2</sub> | LiO <sup>t</sup> Bu             | toluene            | trace      |
| 25              | Pd(OAc) <sub>2</sub>               | L5 | Cu(OAc) <sub>2</sub> | K <sub>2</sub> CO <sub>3</sub>  | DMF                | 0          |
| 26              | Pd(OAc) <sub>2</sub>               | L5 | Cu(OAc) <sub>2</sub> | K <sub>2</sub> CO <sub>3</sub>  | DMSO               | 0          |
| 27              | Pd(OAc) <sub>2</sub>               | L5 | Cu(OAc) <sub>2</sub> | K <sub>2</sub> CO <sub>3</sub>  | CH <sub>3</sub> CN | 0          |
| 28              | Pd(OAc) <sub>2</sub>               | L5 | Cu(OAc) <sub>2</sub> | K <sub>2</sub> CO <sub>3</sub>  | DCE                | 0          |
| 29              | Pd(OAc) <sub>2</sub>               | L5 | Cu(OAc) <sub>2</sub> | K <sub>2</sub> CO <sub>3</sub>  | THF                | trace      |
| 30              | Pd(OAc) <sub>2</sub>               | L5 | Cu(OAc) <sub>2</sub> | K <sub>2</sub> CO <sub>3</sub>  | dioxane            | trace      |
| 31              | Pd(OAc) <sub>2</sub>               | L5 | Cu(OAc) <sub>2</sub> | K <sub>2</sub> CO <sub>3</sub>  | MeOH               | 0          |
| 32 <sup>e</sup> |                                    | L5 | Cu(OAc) <sub>2</sub> | K <sub>2</sub> CO <sub>3</sub>  | toluene            | 0          |
| 33 <sup>f</sup> | Pd(OAc) <sub>2</sub>               |    | Cu(OAc) <sub>2</sub> | K <sub>2</sub> CO <sub>3</sub>  | toluene            | 0          |
| 34 <sup>g</sup> | Pd(OAc) <sub>2</sub>               | L5 |                      | K <sub>2</sub> CO <sub>3</sub>  | toluene            | 0          |
| 35 <sup>h</sup> | Pd(OAc) <sub>2</sub>               | L5 | Cu(OAc) <sub>2</sub> |                                 | toluene            | trace      |
| 36              | Pd(TFA) <sub>2</sub>               | L5 | Cu(OAc) <sub>2</sub> | K <sub>2</sub> CO <sub>3</sub>  | toluene            | 66 (>10/1) |
| 37              | Pd(PPh <sub>3</sub> ) <sub>4</sub> | L5 | Cu(OAc) <sub>2</sub> | K <sub>2</sub> CO <sub>3</sub>  | toluene            | trace      |
| 38              | Pd(acac) <sub>2</sub>              | L5 | Cu(OAc) <sub>2</sub> | K <sub>2</sub> CO <sub>3</sub>  | toluene            | trace      |
| 39              | Pd(dba) <sub>2</sub>               | L5 | Cu(OAc) <sub>2</sub> | K <sub>2</sub> CO <sub>3</sub>  | toluene            | trace      |
| 40              | Pd <sub>2</sub> (dba) <sub>3</sub> | L5 | Cu(OAc) <sub>2</sub> | K <sub>2</sub> CO <sub>3</sub>  | toluene            | trace      |
| 41              | PdCl <sub>2</sub>                  | L5 | Cu(OAc) <sub>2</sub> | K <sub>2</sub> CO <sub>3</sub>  | toluene            | trace      |

<sup>a</sup>Reaction conditions: 1-indanone **1a** (0.2 mmol), diphenylacetylene **2a** (0.3 mmol, 1.5 equiv), palladium catalyst (5 mol%), ligand (10 mol%), oxidant (2.0 equiv), base (2.0 equiv), solvent (3 mL) at 120 °C for 24 h under air atmosphere. <sup>b</sup>Isolated yield. <sup>c</sup>Reaction carried out in the presence of 1.0 equiv Cu(OAc)<sub>2</sub>. <sup>d</sup>Reaction carried out in the presence of 3.0 equiv Cu(OAc)<sub>2</sub>. <sup>e</sup>Reaction carried out in the absence of Pd(OAc)<sub>2</sub>. <sup>f</sup>Reaction carried out in the absence of **L5**. <sup>g</sup>Reaction carried out in the absence of Cu(OAc)<sub>2</sub>. <sup>h</sup>Reaction carried out in the absence of K<sub>2</sub>CO<sub>3</sub>.

## General Catalytic Procedure for Palladium-Catalyzed Oxidative Cycloaddition of 1-Indanones and Internal Aryl Alkynes toward Benzofluorenone Derivatives

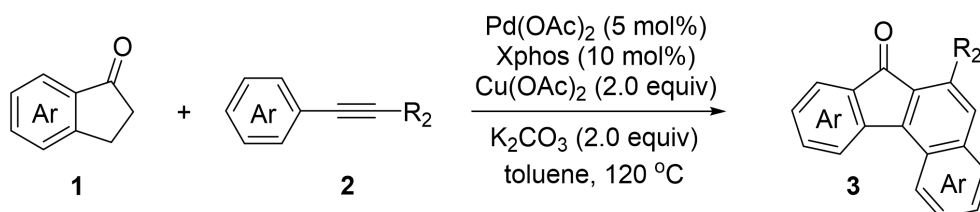

To a dry thick walled pressure resistant tube (25 mL) was charged with 2,3-dihydro-1H-inden-1-ones **1** (0.2 mmol), alkynes **2** (0.3 mmol, 1.5 equiv),  $\text{Pd}(\text{OAc})_2$  (2.3 mg, 5 mol%),  $\text{Cu}(\text{OAc})_2$  (0.4 mmol, 79.9 mg, 2.0 equiv), Xphos (9.6 mg, 10 mol%),  $\text{K}_2\text{CO}_3$  (0.4 mmol, 55.2 mg), then the toluene (3 mL) was added. The tube was closed with a PTFE thread sealing cap. The mixture was stirred at 120 °C in oil bath for 24 hours under an atmosphere of air. After the reaction finished, the resulted mixtures were diluted with 20 mL of dichloromethane and washed with 20 mL of  $\text{H}_2\text{O}$ . The aqueous layer was extracted twice with dichloromethane (10 mL) and the combined organic phase was dried over  $\text{Na}_2\text{SO}_4$ . After evaporation of the solvents, the residue was purified by silica gel chromatography (hexane/AcOEt = 20 : 1) to yield product.

### Procedure Gram-scale for the Synthesis of **3a**.

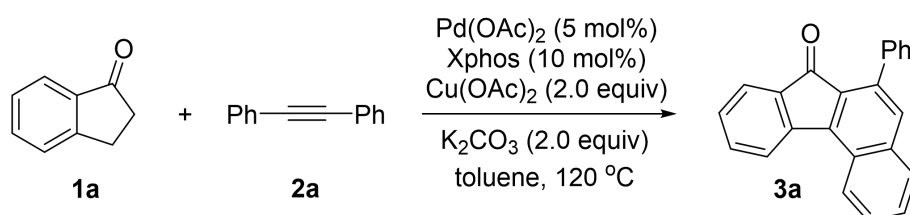

To a dry thick walled pressure resistant tube (250 mL) was charged with 2,3-dihydro-1H-inden-1-one **1a** (5 mmol), 1,2-diphenylethyne **2a** (7.5 mmol, 1.5 equiv), Pd(OAc)<sub>2</sub> (57.2 mg, 5 mol%), Cu(OAc)<sub>2</sub> (0.4 mmol, 1997.5 mg, 2.0 equiv), Xphos (238.7 mg, 10 mol%), K<sub>2</sub>CO<sub>3</sub> (0.4 mmol, 1380.0 mg), then the toluene (50 mL) was added. The tube was closed with a PTFE thread sealing cap. The mixture was stirred at 120 °C in oil bath for 24 hours under an atmosphere of air. After the reaction finished, the resulted mixtures were diluted with 200 mL of dichloromethane and washed with 200 mL of H<sub>2</sub>O. The aqueous layer was extracted twice with dichloromethane (100 mL) and the combined organic phase was dried over Na<sub>2</sub>SO<sub>4</sub>. After evaporation of the solvents, the residue was purified by silica gel chromatography (hexane/AcOEt = 20 : 1) to yield product **3a** (64% yield, 979.2 mg).



## Mechanistic Study

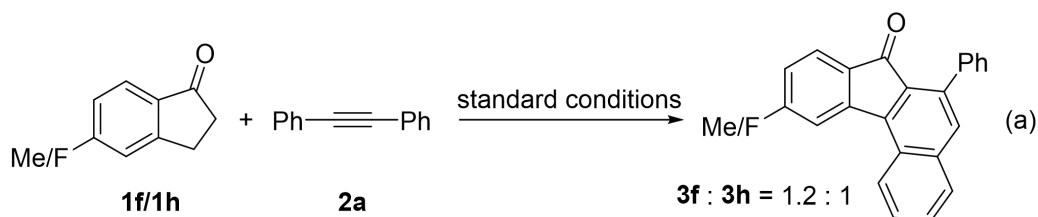

To a dry thick walled pressure resistant tube (25 mL) was charged with 5-methyl-2,3-dihydro-1H-inden-1-one **1b** (0.1 mmol), 5-fluoro-2,3-dihydro-1H-inden-1-one **1d** (0.1 mmol), 1,2-diphenylethyne **2a** (0.3 mmol), Pd(OAc)<sub>2</sub> (2.3 mg, 5 mol%), Cu(OAc)<sub>2</sub> (0.4 mmol, 79.9 mg, 2.0 equiv), Xphos (9.6 mg, 10 mol%), K<sub>2</sub>CO<sub>3</sub> (0.4 mmol, 55.2 mg), then the toluene (3 mL) was added. The tube was closed with a PTFE thread sealing cap. The mixture was stirred at 120 °C in oil bath for 24 hours under an atmosphere of air. After the reaction finished, the resulted mixtures were diluted with 20 mL of dichloromethane and washed with 20 mL of H<sub>2</sub>O. The aqueous layer was extracted twice with dichloromethane (10 mL) and the combined organic phase was dried over Na<sub>2</sub>SO<sub>4</sub>. After evaporation of the solvents, the residue was purified by silica gel chromatography (hexane/AcOEt = 20 : 1) to yield product.

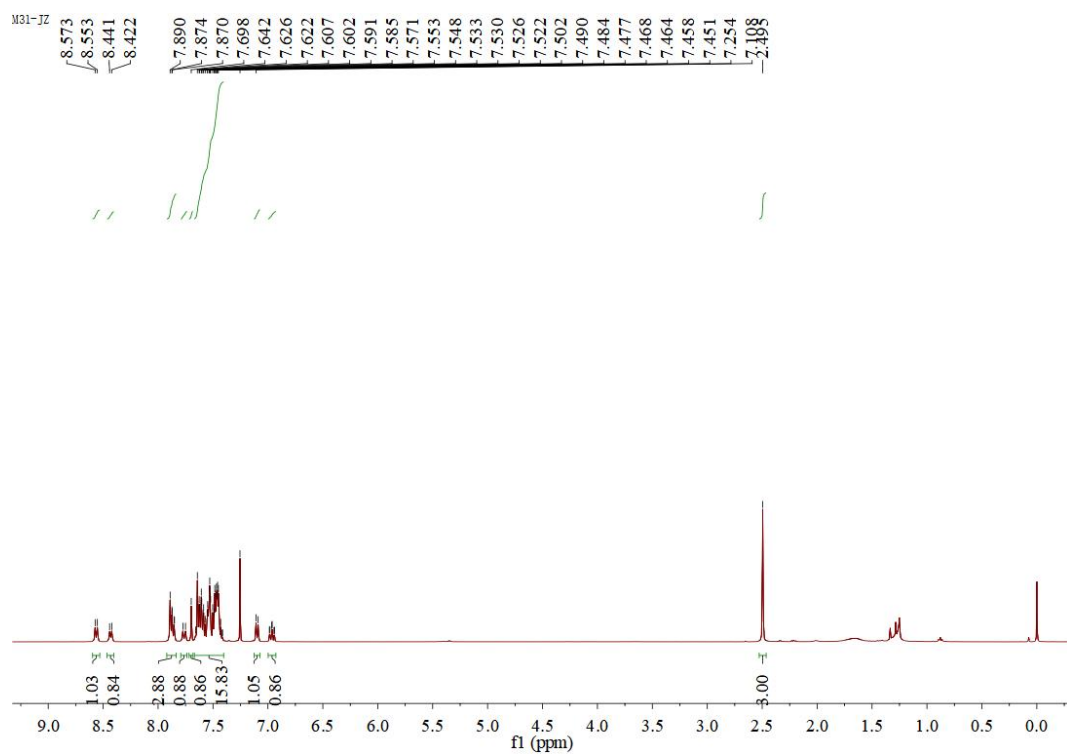

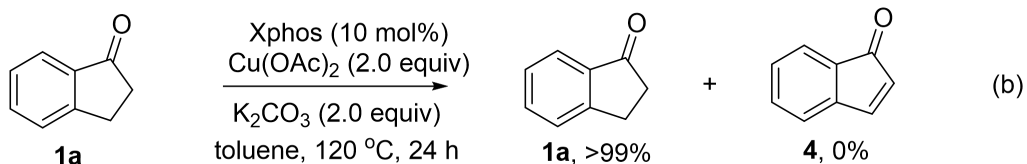

To a dry thick walled pressure resistant tube (25 mL) was charged with 2,3-dihydro-1H-inden-1-one **1a** (0.2 mmol), Cu(OAc)<sub>2</sub> (0.4 mmol, 79.9 mg, 2.0 equiv), Xphos (9.6 mg, 10 mol%), K<sub>2</sub>CO<sub>3</sub> (0.4 mmol, 55.2 mg), then the toluene (3 mL) was added. The tube was closed with a PTFE thread sealing cap. The mixture was stirred at 120 °C in oil bath for 24 hours under an atmosphere of air. No indenone **4** was found, and the recovery rate of 1-indanone **1a** was almost 100%.

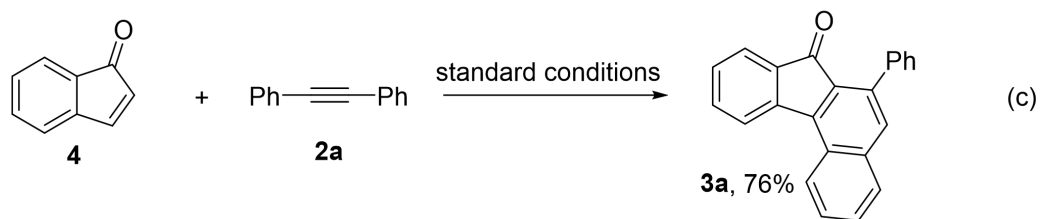

To a dry thick walled pressure resistant tube (25 mL) was charged with 1H-inden-1-one **4** (0.2 mmol), 1,2-diphenylethyne **2a** (0.3 mmol, 1.5 equiv), Pd(OAc)<sub>2</sub> (2.3 mg, 5 mol%), Cu(OAc)<sub>2</sub> (0.4 mmol, 79.9 mg, 2.0 equiv), Xphos (9.6 mg, 10 mol%), K<sub>2</sub>CO<sub>3</sub> (0.4 mmol, 55.2 mg), then the toluene (3 mL) was added. The tube was closed with a PTFE thread sealing cap. The mixture was stirred at 120 °C in oil bath for 24 hours under an atmosphere of air. After the reaction finished, the resulted mixtures were diluted with 20 mL of dichloromethane and washed with 20 mL of H<sub>2</sub>O. The aqueous layer was extracted twice with dichloromethane (10 mL) and the combined organic phase was dried over Na<sub>2</sub>SO<sub>4</sub>. After evaporation of the solvents, the residue was purified by silica gel chromatography (hexane/AcOEt = 20 : 1) to yield product **3a** (76% yield, 46.5 mg).

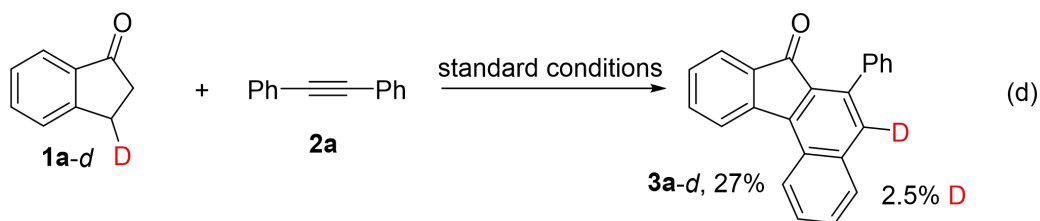

To a dry thick walled pressure resistant tube (25 mL) was charged with 2,3-dihydro-1H-inden-1-one **1a-d** (0.2 mmol), 1,2-diphenylethyne **2a** (0.3 mmol, 1.5 equiv), Pd(OAc)<sub>2</sub> (2.3 mg, 5 mol%), Cu(OAc)<sub>2</sub> (0.4 mmol, 79.9 mg, 2.0 equiv), Xphos (9.6 mg, 10 mol%), K<sub>2</sub>CO<sub>3</sub> (0.4 mmol, 55.2 mg), then the toluene (3 mL) was added. The tube was closed with a PTFE thread sealing cap. The mixture was stirred at 120 °C in oil bath for 24 hours under an atmosphere of air. After the reaction finished, the resulted mixtures were diluted with 20 mL of dichloromethane and washed with 20 mL of H<sub>2</sub>O. The aqueous layer was extracted twice with dichloromethane (10 mL) and the combined organic phase was dried over Na<sub>2</sub>SO<sub>4</sub>. After evaporation of the solvents, the residue was purified by silica gel chromatography (hexane/AcOEt = 20 : 1) to yield product.

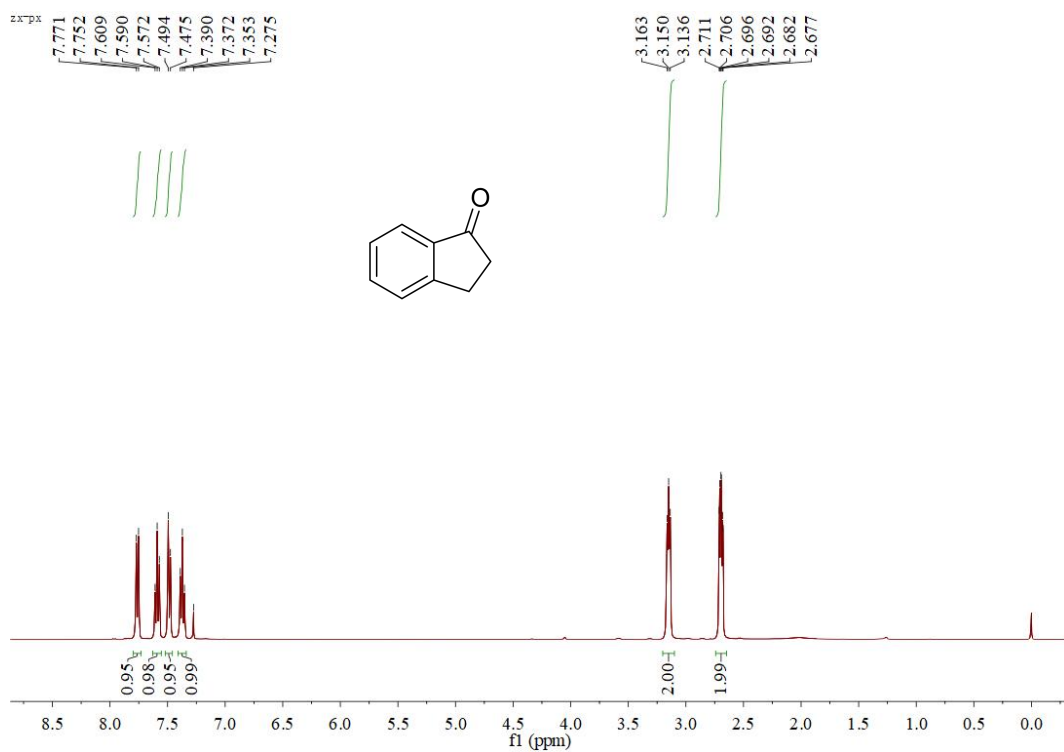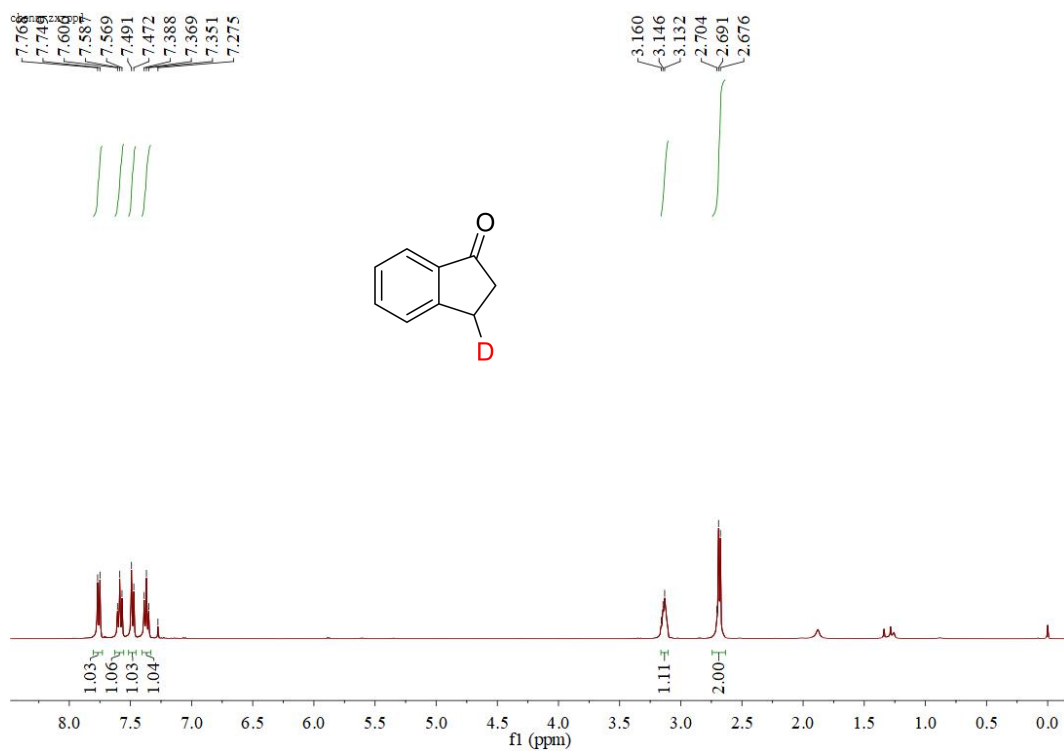

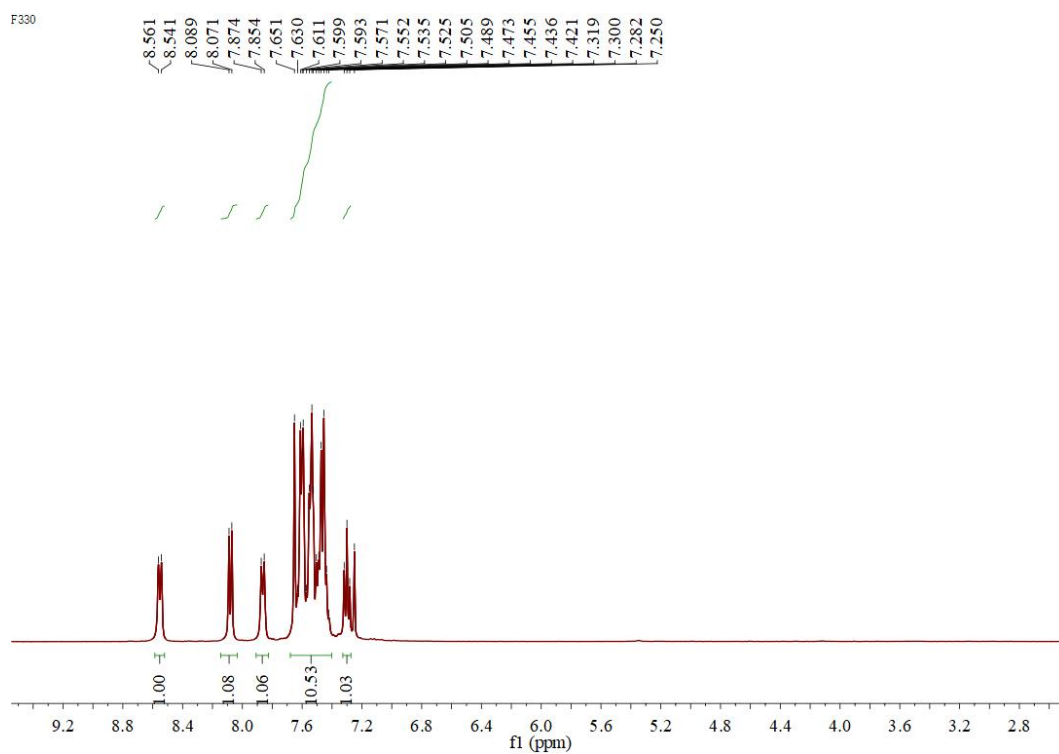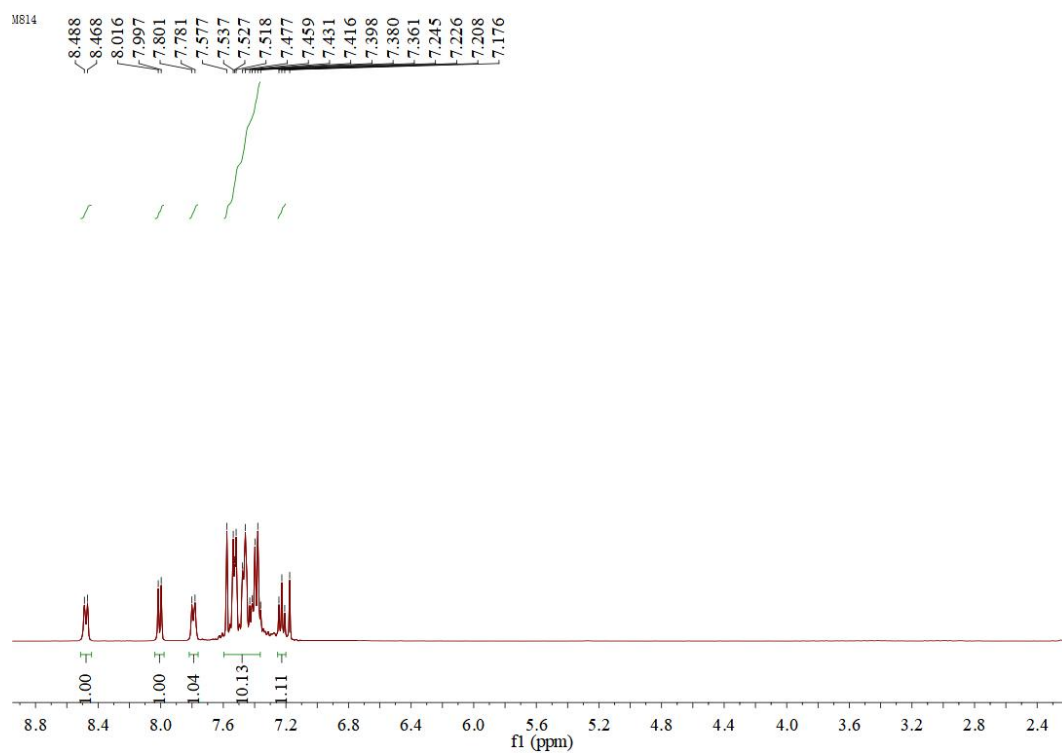

$$10.53 - 10.13 / 10.53 * 100\% = 3.8\%$$

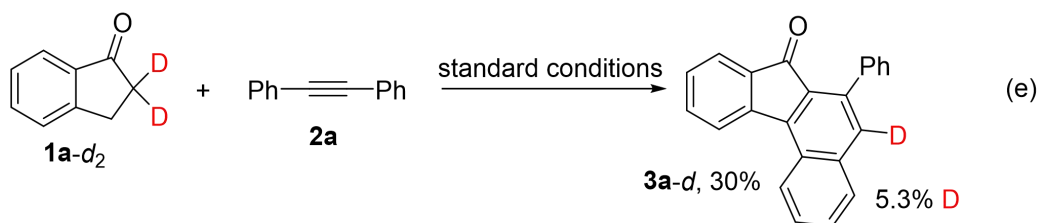

To a dry thick walled pressure resistant tube (25 mL) was charged with 2,3-dihydro-1H-inden-1-one **1a-d<sub>2</sub>** (0.2 mmol), 1,2-diphenylethyne **2a** (0.3 mmol, 1.5 equiv), Pd(OAc)<sub>2</sub> (2.3 mg, 5 mol%), Cu(OAc)<sub>2</sub> (0.4 mmol, 79.9 mg, 2.0 equiv), Xphos (9.6 mg, 10 mol%), K<sub>2</sub>CO<sub>3</sub> (0.4 mmol, 55.2 mg), then the toluene (3 mL) was added. The tube was closed with a PTFE thread sealing cap. The mixture was stirred at 120 °C in oil bath for 24 hours under an atmosphere of air. After the reaction finished, the resulted mixtures were diluted with 20 mL of dichloromethane and washed with 20 mL of H<sub>2</sub>O. The aqueous layer was extracted twice with dichloromethane (10 mL) and the combined organic phase was dried over Na<sub>2</sub>SO<sub>4</sub>. After evaporation of the solvents, the residue was purified by silica gel chromatography (hexane/AcOEt = 20 : 1) to yield product.

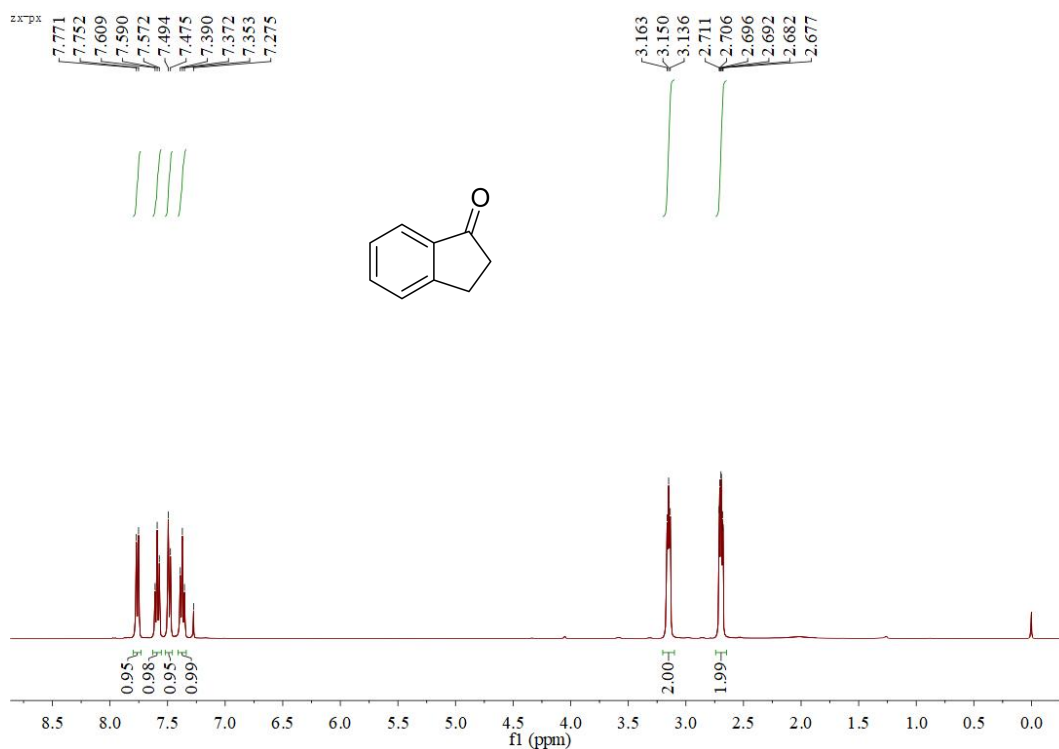



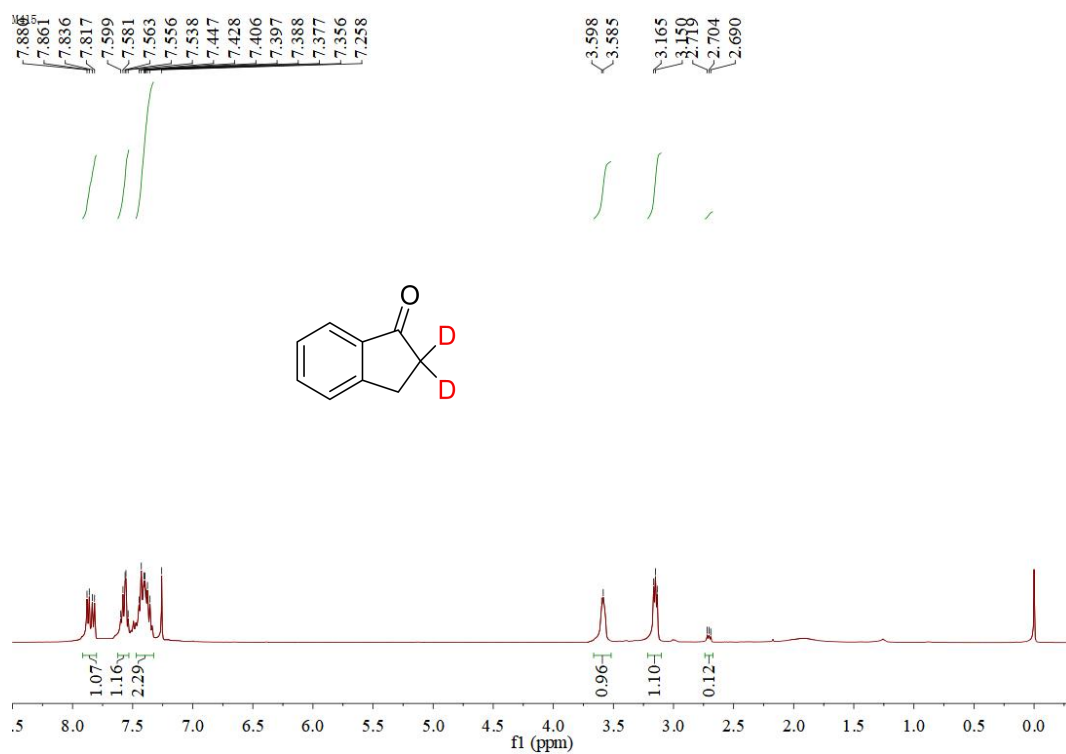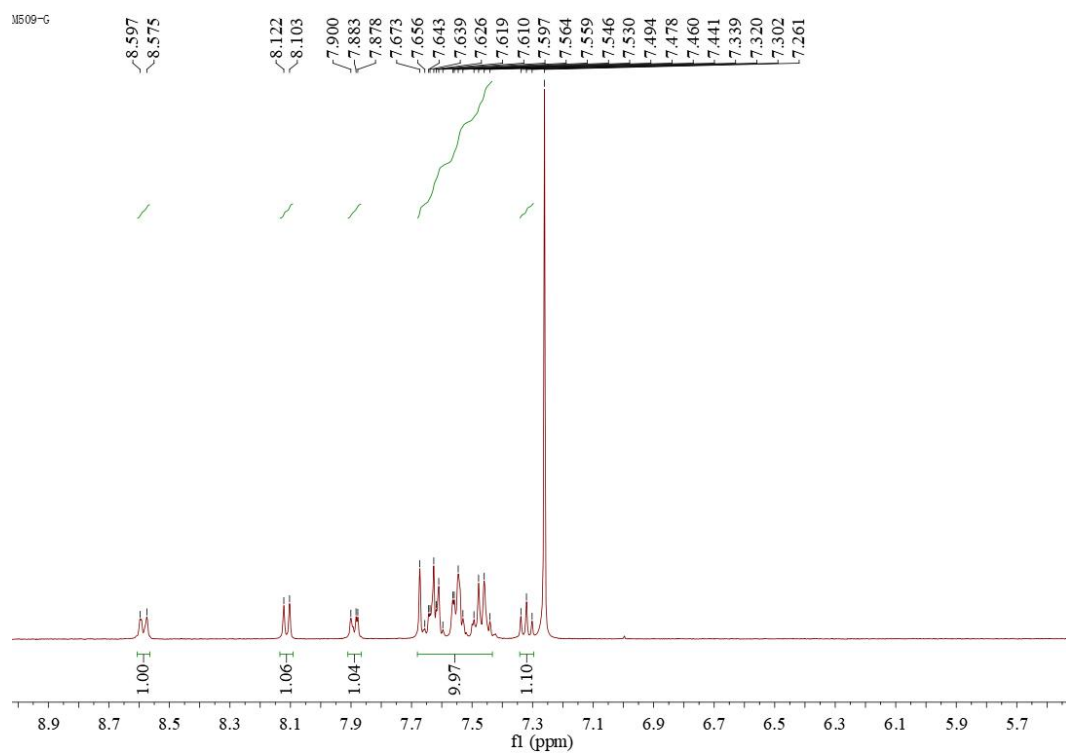

$$10.53 - 9.97 / 10.53 * 100\% = 5.3\%$$

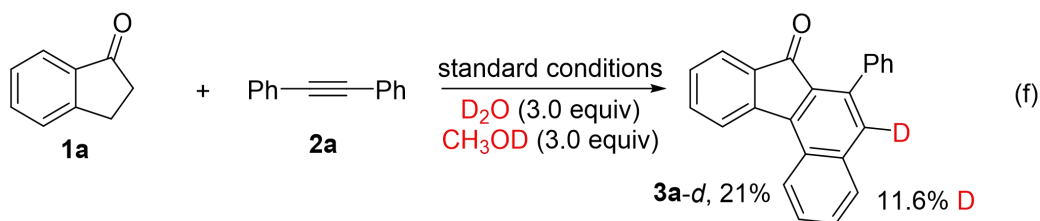

To a dry thick walled pressure resistant tube (25 mL) was charged with 2,3-dihydro-1H-inden-1-one **1a** (0.2 mmol), Pd(OAc)<sub>2</sub> (2.3 mg, 5 mol%), Cu(OAc)<sub>2</sub> (0.4 mmol, 79.9 mg, 2.0 equiv), Xphos (9.6 mg, 10 mol%), K<sub>2</sub>CO<sub>3</sub> (0.4 mmol, 55.2 mg), toluene (3 mL), then the D<sub>2</sub>O (10.8 mg, 0.6 mmol), and CD<sub>3</sub>OD (21.6 mg, 0.6 mmol) were added. The tube was closed with a PTFE thread sealing cap. The mixture was stirred at 120 °C in oil bath for 24 hours under an atmosphere of air. After the reaction finished, the resulted mixtures were diluted with 20 mL of dichloromethane and washed with 20 mL of H<sub>2</sub>O. The aqueous layer was extracted twice with dichloromethane (10 mL) and the combined organic phase was dried over Na<sub>2</sub>SO<sub>4</sub>. After evaporation of the solvents, the residue was purified by silica gel chromatography (hexane/AcOEt = 20 : 1) to yield product.

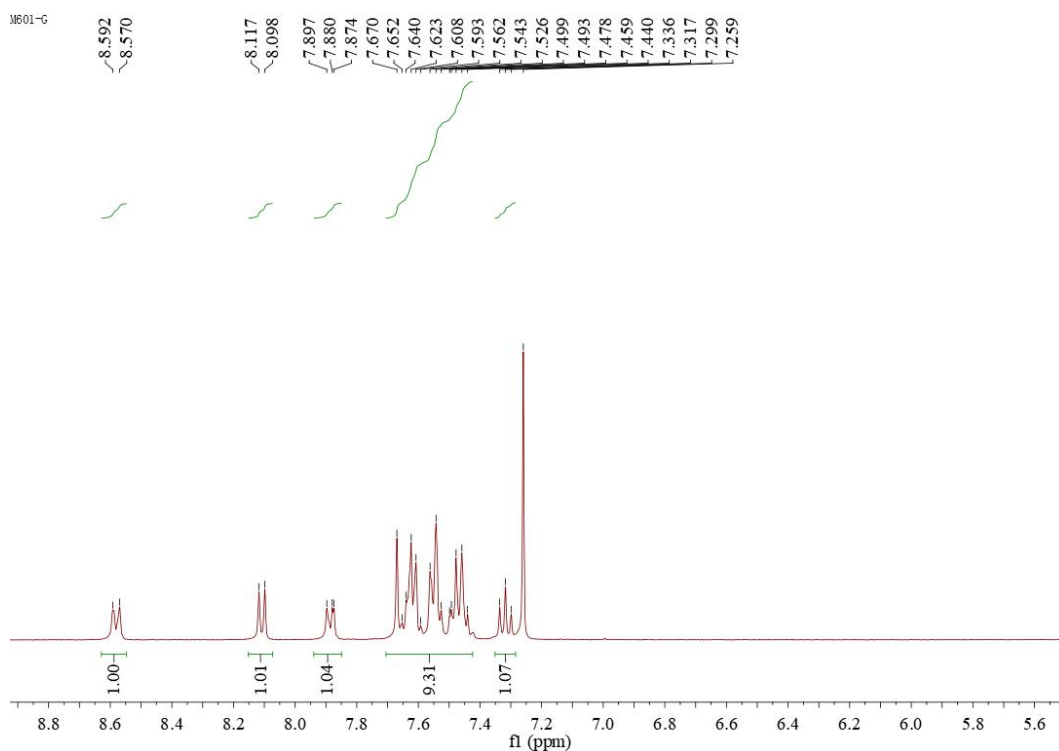

$$10.53-9.31/10.53*100\% = 11.6\%$$

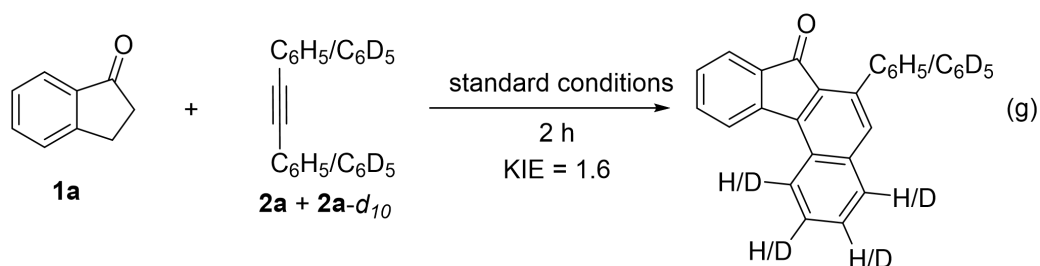

To a dry thick walled pressure resistant tube (25 mL) was charged with 2,3-dihydro-1H-inden-1-one **1a** (0.2 mmol), 1,2-diphenylethyne **2a** (0.15 mmol), 1,2-diphenylethyne-*d*<sub>10</sub> **2a-d<sub>10</sub>** (0.15 mmol), Pd(OAc)<sub>2</sub> (2.3 mg, 5 mol%), Cu(OAc)<sub>2</sub> (0.4 mmol, 79.9 mg, 2.0 equiv), Xphos (9.6 mg, 10 mol%), K<sub>2</sub>CO<sub>3</sub> (0.4 mmol, 55.2 mg), then the toluene (3 mL) was added. The tube was closed with a PTFE thread sealing cap. The mixture was stirred at 120 °C in oil bath for 1 hours under an atmosphere of air. After the reaction finished, the resulted mixtures were diluted with 20 mL of dichloromethane and washed with 20 mL of H<sub>2</sub>O. The aqueous layer was extracted twice with dichloromethane (10 mL) and the combined organic phase was dried over Na<sub>2</sub>SO<sub>4</sub>. After evaporation of the solvents, the residue was purified by silica gel chromatography (hexane/AcOEt = 20 : 1) to yield product.

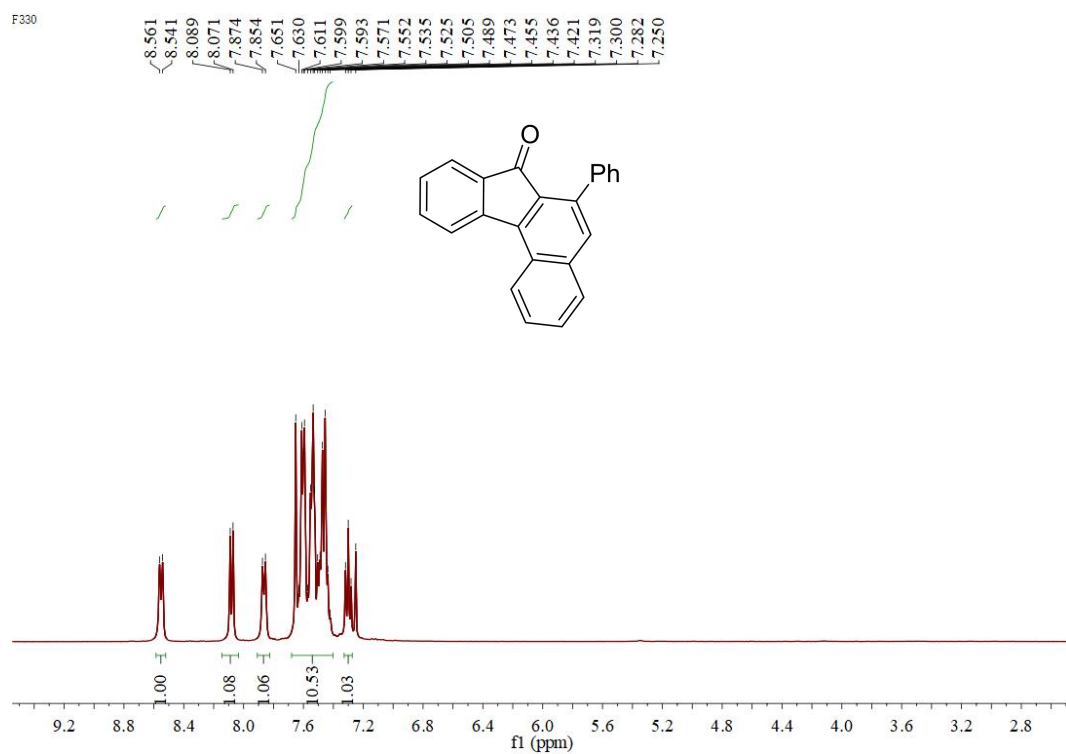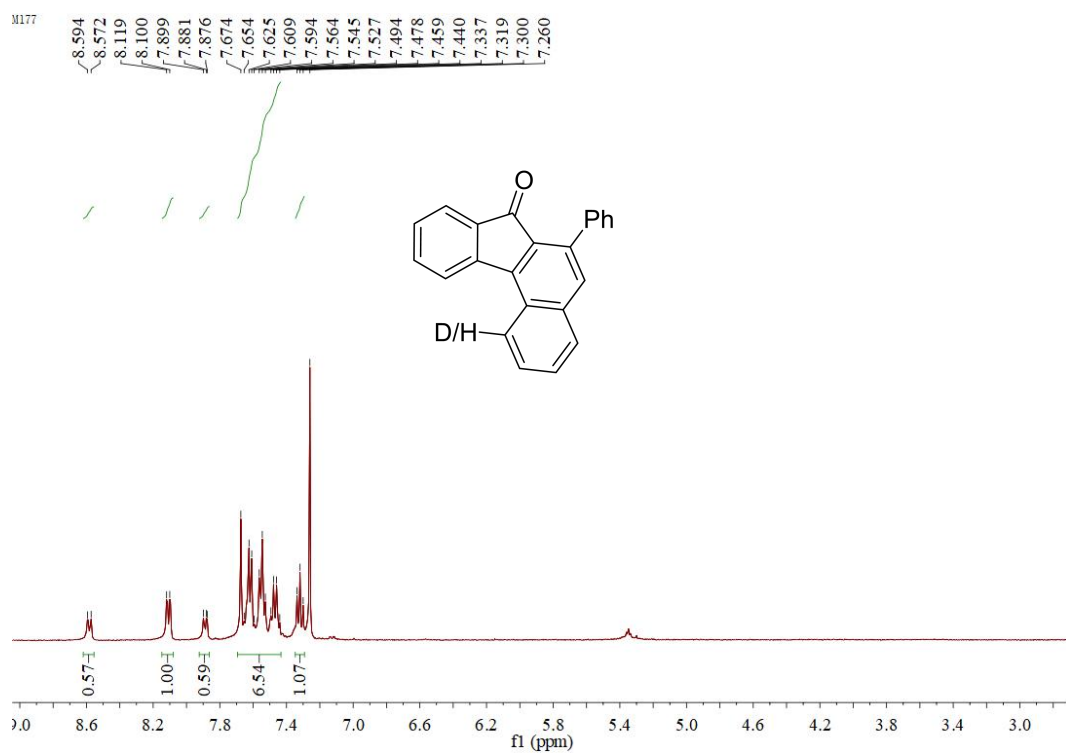

$$6.54 / (10.53 - 6.54) = 6.54 / 3.99 = 1.6$$

## X-Ray Crystallographic Data

### Crystal Structure Details for Product 3m (CCDC: 2312081)

A pale yellow solid crystal of **3m** ( $C_{24}H_{13}F_3O$ ) was grown by the vapor diffusion method (hexane and EtOAc). X-Ray diffraction data of one these crystals were collected on a Xcalibur, Eos diffractometer. The measurements were performed with Mo-K $\alpha$  radiation ( $\lambda = 0.71073$  Å). The crystal was kept at 296.15 K during data collection.

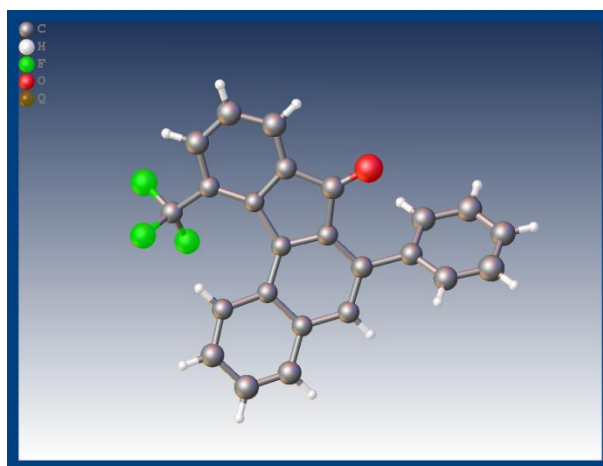

Perspective thermal ellipsoid view of the single-crystal structures at 50% probability

**Table 1 Crystal data and structure refinement for 1.**

|                                  |                    |
|----------------------------------|--------------------|
| Identification code              | 1                  |
| Empirical formula                | $C_{24}H_{13}F_3O$ |
| Formula weight                   | 374.34             |
| Temperature/K                    | 296.15             |
| Crystal system                   | Orthorhombic       |
| Space group                      | Pca21 (No. 29)     |
| a/Å                              | 14.865(2)          |
| b/Å                              | 12.8982(19)        |
| c/Å                              | 9.3217(14)         |
| $\alpha/^\circ$                  | 90.00              |
| $\beta/^\circ$                   | 106.415(4)         |
| $\gamma/^\circ$                  | 90.00              |
| Volume/Å <sup>3</sup>            | 1787.3(4)          |
| Z                                | 4                  |
| $\rho_{\text{calc}}/\text{cm}^3$ | 1.391              |
| $\mu/\text{mm}^{-1}$             | 0.105              |
| F(000)                           | 768.0              |

|                                             |                                                               |
|---------------------------------------------|---------------------------------------------------------------|
| Crystal size/mm <sup>3</sup>                | ? × ? × ?                                                     |
| Radiation                                   | MoK $\alpha$ ( $\lambda$ = 0.71073)                           |
| 2 $\Theta$ range for data collection/°      | 2.1 to 27.6                                                   |
| Index ranges                                | -19 ≤ h ≤ 13, -15 ≤ k ≤ 16, -11 ≤ l ≤ 12                      |
| Reflections collected                       | 9588                                                          |
| Independent reflections                     | 3757 [R <sub>int</sub> = 0.0520, R <sub>sigma</sub> = 0.1233] |
| Data/restraints/parameters                  | 3757/0/227                                                    |
| Goodness-of-fit on F <sup>2</sup>           | 1.016                                                         |
| Final R indexes [I ≥ 2 $\sigma$ (I)]        | R <sub>1</sub> = 0.0523, wR <sub>2</sub> = 0.1309             |
| Final R indexes [all data]                  | R <sub>1</sub> = 0.0961, wR <sub>2</sub> = 0.1552             |
| Largest diff. peak/hole / e Å <sup>-3</sup> | -0.23/0.18                                                    |

### Characterization data for the products

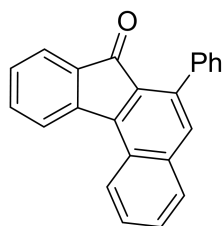

6-Phenyl-7H-benzo[c]fluoren-7-one (**3a**): Obtained as a yellow solid (43.5 mg, 71% yield), eluting with 5% EtOAc in PE (elution gradient);  $^1\text{H}$  NMR (400 MHz,  $\text{CDCl}_3$ )  $\delta$  8.55 (d,  $J = 8.0$  Hz, 1H), 8.08 (d,  $J = 7.2$  Hz, 1H), 7.86 (d,  $J = 8.0$  Hz, 1H), 7.42 - 7.65 (m, 10H), 7.28 - 7.32 (t, 1H);  $^{13}\text{C}$  NMR (101 MHz,  $\text{CDCl}_3$ )  $\delta$  193.5, 144.3, 144.0, 138.1, 137.7, 137.5, 134.6, 134.2, 131.4, 129.5, 129.4, 128.9, 128.7, 128.5, 128.2, 127.8, 127.8, 127.6, 124.7, 123.9, 123.3; HRMS (ESI-TOF)  $m/z$  calcd for  $\text{C}_{23}\text{H}_{15}\text{O}$   $[\text{M} + \text{H}]^+$  307.1117, found 307.1115.

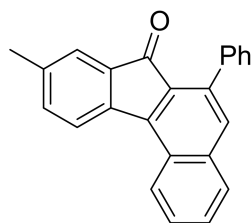

9-Methyl-6-phenyl-7H-benzo[c]fluoren-7-one (**3b**): Obtained as a yellow solid (47.4 mg, 74% yield), eluting with 5% EtOAc in PE (elution gradient);  $^1\text{H}$  NMR (400 MHz,  $\text{CDCl}_3$ )  $\delta$  8.48 - 8.50 (t, 1H), 7.91 (d,  $J = 7.6$  Hz, 1H), 7.82 - 7.84 (t, 1H), 7.53 - 7.60 (m, 5H), 7.41 - 7.48 (m, 3H), 7.38 (s, 1H), 7.28 (d,  $J = 7.2$  Hz, 1H), 2.36 (s, 3H);  $^{13}\text{C}$  NMR (101 MHz,  $\text{CDCl}_3$ )  $\delta$  193.7, 144.6, 141.2, 139.1, 138.1, 137.6, 137.4, 134.8, 134.5, 130.9, 129.4, 128.6, 128.4, 128.0, 127.8, 127.4, 124.8, 124.6, 123.1, 21.2; HRMS (ESI-TOF)  $m/z$  calcd for  $\text{C}_{24}\text{H}_{17}\text{O}$   $[\text{M} + \text{H}]^+$  321.1274, found 321.1273.

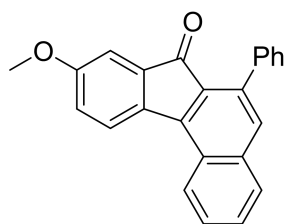

9-Methoxy-6-phenyl-7H-benzo[c]fluoren-7-one (**3c**): Obtained as a yellow solid (46.4 mg, 69% yield), eluting with 7% EtOAc in PE (elution gradient);  $^1\text{H}$  NMR (400 MHz,  $\text{CDCl}_3$ )  $\delta$  8.46 - 8.49 (t, 1H), 7.96 (d,  $J = 8.0$  Hz, 1H),

7.83 - 7.85 (t, 1H), 7.53 - 7.59 (m, 5H), 7.43 - 7.48 (m, 3H), 7.16 (d,  $J = 2.4$  Hz, 1H), 6.97 - 7.00 (q, 1H), 3.86 (s, 3H);  $^{13}\text{C}$  NMR (101 MHz,  $\text{CDCl}_3$ )  $\delta$  193.3, 160.6, 145.1, 138.1, 137.7, 137.6, 136.7, 136.2, 130.1, 129.4, 129.3, 128.8, 128.3, 127.8, 127.7, 127.4, 124.8, 124.3, 118.6, 109.9, 55.7; HRMS (ESI-TOF)  $m/z$  calcd for  $\text{C}_{24}\text{H}_{17}\text{O}_2$  [ $\text{M} + \text{H}$ ] $^+$  337.1223, found 337.1224.

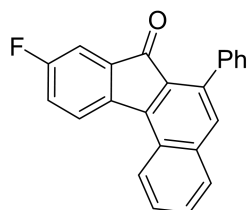

9-Fluoro-6-phenyl-7H-benzo[c]fluoren-7-one (**3d**): Obtained as a yellow solid (41.5 mg, 64% yield), eluting with 5% EtOAc in PE (elution gradient);  $^1\text{H}$  NMR (400 MHz,  $\text{CDCl}_3$ )  $\delta$  8.39 (d,  $J = 7.6$  Hz, 1H), 7.85 (d,  $J = 6.8$  Hz, 1H), 7.72 (d,  $J = 9.2$  Hz, 1H), 7.67 (s, 1H), 7.45 - 7.60 (m, 8H), 6.92 - 6.96 (t,  $J = 8.4$ , 16.4 Hz, 1H);  $^{13}\text{C}$  NMR (101 MHz,  $\text{CDCl}_3$ )  $\delta$  191.7, 166.7 (d,  $J = 251.6$  Hz), 146.6 (d,  $J = 9.8$  Hz), 142.2 (d,  $J = 1.8$  Hz), 137.8, 137.6, 137.3, 132.1, 130.5 (d,  $J = 2.8$  Hz), 129.6, 129.4, 129.1, 128.8, 127.9, 127.9, 127.8, 125.6 (d,  $J = 10.1$  Hz), 124.1, 114.8 (d,  $J = 22.9$  Hz), 111.8 (d,  $J = 25.9$  Hz);  $^{19}\text{F}$  NMR (400 MHz,  $\text{CDCl}_3$ )  $\delta$  -103.4; HRMS (ESI-TOF)  $m/z$  calcd for  $\text{C}_{23}\text{H}_{14}\text{FO}$  [ $\text{M} + \text{H}$ ] $^+$  325.1023, found 325.1021.

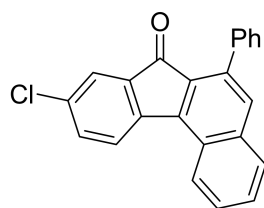

9-Chloro-6-phenyl-7H-benzo[c]fluoren-7-one (**3e**): Obtained as a yellow solid (44.9 mg, 66% yield), eluting with 5% EtOAc in PE (elution gradient);  $^1\text{H}$  NMR (400 MHz,  $\text{CDCl}_3$ )  $\delta$  8.49 (s, 1H), 7.58 (d,  $J = 8.4$  Hz, 1H), 7.31 - 7.35 (m, 1H), 7.06 - 7.14 (m, 4H), 6.96 - 7.00 (m, 2H), 6.78 (t,  $J = 8.4$  Hz, 1H), 6.63 - 7.64 (m, 1H), 6.47 (d,  $J = 7.2$  Hz, 1H);  $^{13}\text{C}$  NMR (101 MHz,  $\text{CDCl}_3$ )  $\delta$  193.9, 145.5, 142.3, 140.0, 138.9, 136.6, 135.9, 134.3, 133.0, 129.5, 129.3, 129.1, 128.8, 128.5, 128.3, 127.8, 127.2, 124.4, 124.3, 123.7; HRMS (ESI-TOF)  $m/z$  calcd for  $\text{C}_{23}\text{H}_{14}\text{ClO}$  [ $\text{M} + \text{H}$ ] $^+$  341.0728, found 341.0725.



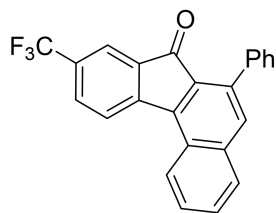

6-Phenyl-9-(trifluoromethyl)-7H-benzo[c]fluoren-7-one (**3f**):

Obtained as a yellow solid (45.6 mg, 61% yield), eluting with 5% EtOAc in PE (elution gradient);  $^1\text{H}$  NMR (400 MHz,  $\text{CDCl}_3$ )  $\delta$  8.55 (d,  $J = 7.6$  Hz, 1H), 8.21 (d,  $J = 8.0$  Hz, 1H), 7.92 (d,  $J = 7.6$  Hz, 1H), 7.81 - 7.83 (m, 2H), 7.75 (s, 1H), 7.64 - 7.70 (m, 2H), 7.45 - 7.55 (m, 5H);  $^{13}\text{C}$  NMR (101 MHz,  $\text{CDCl}_3$ )  $\delta$  191.7, 147.1, 142.9, 137.8 (q,  $J = 5.4, 9.9$  Hz), 137.6, 137.5, 135.0, 132.60, 131.2 (q,  $J = 3.8, 7.6$  Hz), 131.1, 130.8, 129.7, 129.3, 128.7 (q,  $J = 6.4, 94.9$  Hz), 128.1, 127.9, 125.0, 124.4, 123.2, 122.3, 120.5 (q,  $J = 3.7, 7.1$  Hz);  $^{19}\text{F}$  NMR (400 MHz,  $\text{CDCl}_3$ )  $\delta$  -63.0; HRMS (ESI-TOF)  $m/z$  calcd for  $\text{C}_{24}\text{H}_{14}\text{F}_3\text{O}$   $[\text{M} + \text{H}]^+$  375.0991, found 375.0987.

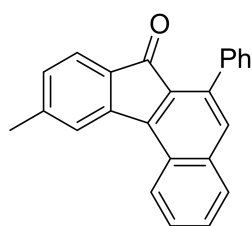

10-Methyl-6-phenyl-7H-benzo[c]fluoren-7-one (**3g**):

Obtained as a yellow solid (49.3 mg, 77% yield), eluting with 5% EtOAc in PE (elution gradient);  $^1\text{H}$  NMR (400 MHz,  $\text{CDCl}_3$ )  $\delta$  8.55 (d,  $J = 8.0$  Hz, 1H), 7.88 (s, 1H), 7.85 (d,  $J = 8.4$  Hz, 1H), 7.63 (s, 1H), 7.58 - 7.61 (m, 2H), 7.53 - 7.55 (m, 2H), 7.41 - 7.50 (m, 4H), 7.09 (d,  $J = 7.2$  Hz, 1H), 2.49 (s, 3H);  $^{13}\text{C}$  NMR (101 MHz,  $\text{CDCl}_3$ )  $\delta$  193.2, 145.1, 144.4, 144.0, 138.1, 137.7, 137.3, 132.3, 131.3, 129.5, 129.4, 129.2, 128.6, 128.1, 127.7, 127.5, 124.7, 124.5, 123.8, 22.4; HRMS (ESI-TOF)  $m/z$  calcd for  $\text{C}_{24}\text{H}_{17}\text{O}$   $[\text{M} + \text{H}]^+$  321.1274, found 321.1277.

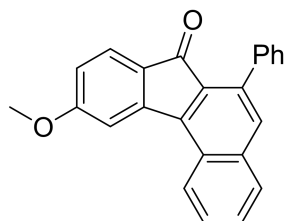

10-Methoxy-6-phenyl-7H-benzo[c]fluoren-7-one (**3h**):

Obtained as a yellow solid (47.0 mg, 70% yield), eluting with 7% EtOAc in PE

(elution gradient);  $^1\text{H}$  NMR (400 MHz,  $\text{CDCl}_3$ )  $\delta$  8.48 (d,  $J$  = 8.8 Hz, 1H), 7.84 - 7.86 (m, 1H), 7.65 (s, 1H), 7.53 - 7.60 (m, 6H), 7.43 - 7.49 (m, 3H), 6.70 - 6.73 (q, 1H), 3.93 (s, 3H);  $^{13}\text{C}$  NMR (101 MHz,  $\text{CDCl}_3$ )  $\delta$  192.2, 164.7, 146.1, 142.7, 138.1, 137.5, 137.2, 131.6, 129.8, 129.5, 129.4, 128.5, 128.1, 127.7, 127.6, 127.6, 125.6, 124.4, 112.2, 110.7, 55.8; HRMS (ESI-TOF)  $m/z$  calcd for  $\text{C}_{24}\text{H}_{17}\text{O}_2$   $[\text{M} + \text{H}]^+$  337.1223, found 337.1225.

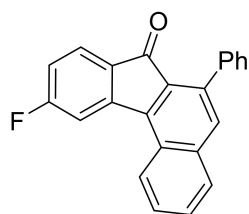

10-Fluoro-6-phenyl-7H-benzo[c]fluoren-7-one (**3i**): Obtained as a yellow solid (39.5 mg, 61% yield), eluting with 5% EtOAc in PE (elution gradient);  $^1\text{H}$  NMR (400 MHz,  $\text{CDCl}_3$ )  $\delta$  8.43 (d,  $J$  = 7.6 Hz, 1H), 7.87 - 7.89 (m, 1H), 7.74 - 7.77 (dd,  $J$  = 2.0, 9.6 Hz, 1H), 7.70 (s, 1H), 7.57 - 7.66 (m, 3H), 7.52 - 7.54 (m, 2H), 7.42 - 7.50 (m, 3H), 6.94 - 6.98 (m, 1H);  $^{13}\text{C}$  NMR (101 MHz,  $\text{CDCl}_3$ )  $\delta$  191.8, 166.7 (d,  $J$  = 151.7 Hz), 146.6 (d,  $J$  = 9.6 Hz), 142.3 (d,  $J$  = 2.3 Hz), 137.8, 137.6, 137.3, 132.1, 130.5 (d,  $J$  = 2.6 Hz), 129.6, 129.4, 129.1, 128.9, 128.0, 127.9, 127.8, 125.6, 125.5, 124.1, 114.8 (d,  $J$  = 22.8 Hz), 111.8 (d,  $J$  = 25.9 Hz);  $^{19}\text{F}$  NMR (400 MHz,  $\text{CDCl}_3$ )  $\delta$  -103.4; HRMS (ESI-TOF)  $m/z$  calcd for  $\text{C}_{23}\text{H}_{14}\text{FO}$   $[\text{M} + \text{H}]^+$  325.1023, found 325.1025.

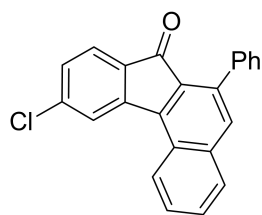

10-Chloro-6-phenyl-7H-benzo[c]fluoren-7-one (**3j**): Obtained as a yellow solid (42.2 mg, 62% yield), eluting with 5% EtOAc in PE (elution gradient);  $^1\text{H}$  NMR (400 MHz,  $\text{CDCl}_3$ )  $\delta$  8.44 (d,  $J$  = 8.0 Hz, 1H), 8.03 (s, 1H), 7.87 (d,  $J$  = 7.6 Hz, 1H), 7.69 (s, 1H), 7.59 - 7.66 (m, 2H), 7.44 - 7.54 (m, 6H), 7.25 - 7.29 (m, 1H);  $^{13}\text{C}$  NMR (101 MHz,  $\text{CDCl}_3$ )  $\delta$  192.0, 145.6, 142.8, 140.3, 137.7, 137.7, 137.4, 132.7, 132.1, 129.6, 129.3, 129.0, 128.9, 128.6, 128.0, 128.0, 127.9, 127.8, 124.7, 124.3,

123.9; HRMS (ESI-TOF)  $m/z$  calcd for  $C_{23}H_{14}ClO$   $[M + H]^+$  341.0728, found 341.0725.

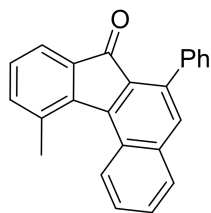

11-Methyl-6-phenyl-7H-benzo[c]fluoren-7-one (**3k**): Obtained as a yellow solid (41.6 mg, 65% yield), eluting with 5% EtOAc in PE (elution gradient);  $^1H$  NMR (400 MHz,  $CDCl_3$ )  $\delta$  8.32 (d,  $J = 8.4$  Hz, 1H), 7.85 (d,  $J = 7.6$  Hz, 1H), 7.68 (s, 1H), 7.52 - 7.59 (m, 4H), 7.43 - 7.51 (m, 4H), 7.35 (d,  $J = 7.6$  Hz, 1H), 7.21 - 7.24 (t, 1H), 2.72 (s, 3H);  $^{13}C$  NMR (101 MHz,  $CDCl_3$ )  $\delta$  192.6, 148.7, 143.4, 138.4, 138.1, 137.74, 137.71, 136.2, 132.7, 131.1, 130.6, 129.5, 128.9, 128.8, 128.7, 127.8, 127.3, 126.6, 125.9, 121.8, 24.0; HRMS (ESI-TOF)  $m/z$  calcd for  $C_{24}H_{17}O$   $[M + H]^+$  321.1274, found 321.1272.

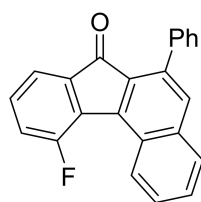

11-fluoro-6-phenyl-7H-benzo[c]fluoren-7-one (**3l**): Obtained as a yellow solid (33.7 mg, 52% yield), eluting with 5% EtOAc in PE (elution gradient);  $^1H$  NMR (400 MHz,  $CDCl_3$ )  $\delta$  8.34 - 8.36 (m, 1H), 7.89 - 7.92 (m, 1H), 7.75 - 7.77 (m, 1H), 7.49 - 7.53 (m, 3H), 7.34 - 7.44 (m, 5H), 7.16 - 7.18 (m, 1H), 7.07 (t,  $J = 8.4$  Hz, 1H);  $^{13}C$  NMR (101 MHz,  $CDCl_3$ )  $\delta$  191.9, 163.3 (d,  $J = 249.7$  Hz), 143.9, 139.7, 139.6, 137.8, 137.7, 137.6, 137.1 (d,  $J = 7.1$  Hz), 131.1, 129.5, 129.3, 129.0, 128.7 (d,  $J = 3.1$  Hz), 127.9, 127.8, 127.7, 127.7, 124.5, 124.4 (d,  $J = 7.5$  Hz), 119.9 (d,  $J = 22.6$  Hz), 111.7 (d,  $J = 23.6$  Hz);  $^{19}F$  NMR (400 MHz,  $CDCl_3$ )  $\delta$  -111.7; HRMS (ESI-TOF)  $m/z$  calcd for  $C_{23}H_{14}FO$   $[M + H]^+$  325.1023, found 325.1026.

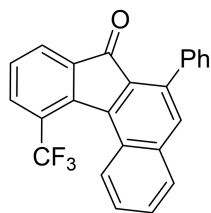

6-Phenyl-11-(trifluoromethyl)-7H-benzo[c]fluoren-7-one (**3m**):

Obtained as a yellow solid (32.2 mg, 43% yield), eluting with 20% EtOAc in PE (elution gradient);  $^1\text{H}$  NMR (400 MHz,  $\text{CDCl}_3$ )  $\delta$  8.30 (d,  $J$  = 8.4 Hz, 1H), 7.88 (d,  $J$  = 8.0 Hz, 1H), 7.78 - 7.82 (t, 3H), 7.54 - 7.64 (m, 4H), 7.45 - 7.51 (m, 4H);  $^{13}\text{C}$  NMR (101 MHz,  $\text{CDCl}_3$ )  $\delta$  190.4, 146.9, 142.4, 137.6, 137.6, 137.5, 137.3, 132.5, 132.4 (q,  $J$  = 4.9, 9.6 Hz), 131.0, 129.5, 128.7, 128.3, 128.2, 128.1, 127.9 (q,  $J$  = 7.9, 267.2 Hz), 126.2, 125.7 (q,  $J$  = 7.5, 13.4 Hz), 125.5, 125.4, 122.7;  $^{19}\text{F}$  NMR (400 MHz,  $\text{CDCl}_3$ )  $\delta$  -55.7; HRMS (ESI-TOF)  $m/z$  calcd for  $\text{C}_{24}\text{H}_{14}\text{F}_3\text{O}$   $[\text{M} + \text{H}]^+$  375.0991, found 375.0993.

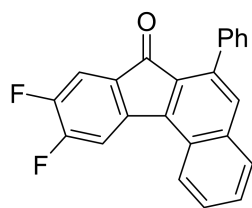

9,10-Difluoro-6-phenyl-7H-benzo[c]fluoren-7-one (**3n**):

Obtained as a yellow solid (34.2 mg, 50% yield), eluting with 5% EtOAc in PE (elution gradient);  $^1\text{H}$  NMR (400 MHz,  $\text{CDCl}_3$ )  $\delta$  8.78 - 8.24 (m, 1H), 7.84 - 7.86 (m, 1H), 7.68 (s, 1H), 7.59 - 7.63 (m, 2H), 7.46 - 7.49 (m, 5H), 7.17 - 7.19 (m, 1H), 6.96 - 7.01 (m, 1H);  $^{13}\text{C}$  NMR (101 MHz,  $\text{CDCl}_3$ )  $\delta$  190.8, 153.7 (dd,  $J$  = 253.3, 13.6 Hz), 150.6 (dd,  $J$  = 251.8, 13.7 Hz), 147.7, 147.6, 147.1, 142.1 (t,  $J$  = 1.8 Hz), 140.6 (dd,  $J$  = 7.5, 3.8 Hz), 139.3, 138.5, 138.4, 137.7, 137.5 (d,  $J$  = 5.8 Hz), 131.8, 131.1 (dd,  $J$  = 4.6, 3.4 Hz), 129.6, 129.3, 129.1, 128.8 (dd,  $J$  = 3.4 Hz), 128.1, 128.0, 127.9, 127.6, 124.4, 124.0, 123.9, 119.1 (dd,  $J$  = 1.8 Hz), 113.5 (dd,  $J$  = 18.9, 1.5 Hz), 113.3 (d,  $J$  = 21.5 Hz);  $^{19}\text{F}$  NMR (400 MHz,  $\text{CDCl}_3$ )  $\delta$  -127.9 (d,  $J$  = 4.9 Hz), -136.2 (d,  $J$  = 4.9 Hz); HRMS (ESI-TOF)  $m/z$  calcd for  $\text{C}_{23}\text{H}_{13}\text{F}_2\text{O}$   $[\text{M} + \text{H}]^+$  343.0929, found 343.0927.

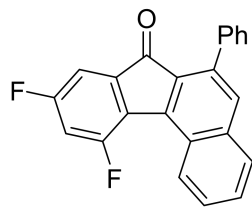

9,11-Difluoro-6-phenyl-7H-benzo[c]fluoren-7-one (**3o**): Obtained as a yellow solid (31.5 mg, 46% yield), eluting with 5% EtOAc in PE (elution gradient);  $^1\text{H}$  NMR (400 MHz,  $\text{CDCl}_3$ )  $\delta$  8.35 (d,  $J = 8.0$  Hz, 1H), 7.83 (d,  $J = 7.6$  Hz, 1H), 7.67 (s, 1H), 7.54 - 7.61 (m, 3H), 7.38 - 7.46 (m, 5H), 7.19 (s, 1H), 6.60 - 6.65 (t, 1H);  $^{13}\text{C}$  NMR (101 MHz,  $\text{CDCl}_3$ )  $\delta$  190.7, 163.8 (d,  $J = 253.6$  Hz), 163.7 (d,  $J = 253.6$  Hz), 155.7 (d,  $J = 254.7$  Hz), 155.6 (d,  $J = 254.7$  Hz), 144.2 (dd,  $J = 3.9$  Hz), 138.9 (dd,  $J = 7.7, 5.1$  Hz), 137.8, 137.7, 132.0, 129.3 (dd,  $J = 7.6, 11.1$  Hz), 128.7 (dd,  $J = 3.1, 1.7$  Hz), 128.0, 127.9, 127.6 (d,  $J = 3.2$  Hz), 127.4, 127.0, 126.7, 124.3 (dd,  $J = 14.8, 4.2$  Hz), 124.0, 110.2 (dd,  $J = 31.7, 25.8$  Hz), 108.6 (dd,  $J = 23.3, 2.7$  Hz);  $^{19}\text{F}$  NMR (400 MHz,  $\text{CDCl}_3$ )  $\delta$  -108.2 (d,  $J = 5.1$  Hz), -120.9 (d,  $J = 5.1$  Hz); HRMS (ESI-TOF)  $m/z$  calcd for  $\text{C}_{23}\text{H}_{13}\text{F}_2\text{O}$   $[\text{M} + \text{H}]^+$  343.0929, found 343.0932.

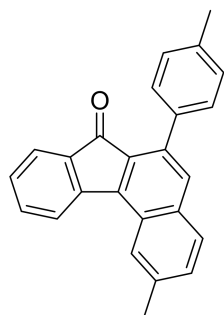

2-Methyl-6-(p-tolyl)-7H-benzo[c]fluoren-7-one (**3p**): Obtained as a yellow solid (50.8 mg, 76% yield), eluting with 5% EtOAc in PE (elution gradient);  $^1\text{H}$  NMR (400 MHz,  $\text{CDCl}_3$ )  $\delta$  8.28 (s, 1H), 8.08 (d,  $J = 7.6$  Hz, 1H), 7.74 (d,  $J = 8.4$  Hz, 1H), 7.58 - 7.59 (m, 2H), 7.50 - 7.53 (m, 1H), 7.40 - 7.45 (m, 3H), 7.25 - 7.30 (m, 3H), 2.59 (s, 3H), 2.44 (s, 3H);  $^{13}\text{C}$  NMR (101 MHz,  $\text{CDCl}_3$ )  $\delta$  193.6, 144.2, 143.3, 137.5, 137.4, 136.8, 135.8, 135.2, 134.6, 134.1, 131.1, 131.0, 129.2, 129.2, 128.6, 128.5, 128.3, 123.7, 123.5, 123.2, 22.2, 21.4; HRMS (ESI-TOF)  $m/z$  calcd for  $\text{C}_{25}\text{H}_{19}\text{O}$   $[\text{M} + \text{H}]^+$  335.1430, found 335.1432.

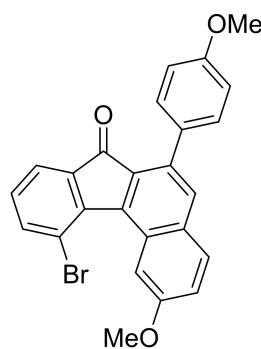

11-Bromo-2-methoxy-6-(4-methoxyphenyl)-7H-benzo[c]fluoren-

7-one (**3q**): Obtained as a yellow solid (60.4 mg, 68% yield), eluting with 10% EtOAc in PE (elution gradient);  $^1\text{H}$  NMR (400 MHz,  $\text{CDCl}_3$ )  $\delta$  8.04 (d,  $J = 3.0$  Hz, 1H), 7.70 - 7.74 (m, 2H), 7.65 (s, 1H), 7.59 (d,  $J = 6.8$  Hz, 1H), 7.46 - 7.48 (m, 2H), 7.24 - 7.27 (m, 1H), 7.13 - 7.17 (m, 1H), 6.98 - 7.00 (m, 2H), 4.02 (s, 3H), 3.88 (s, 3H);  $^{13}\text{C}$  NMR (101 MHz,  $\text{CDCl}_3$ )  $\delta$  191.1, 159.4, 157.5, 145.4, 144.7, 140.4, 138.9, 135.3, 133.7, 132.0, 131.3, 130.6, 130.2, 130.1, 129.9, 127.7, 122.8, 122.5, 116.7, 113.3, 106.7, 55.7, 55.3; HRMS (ESI-TOF)  $m/z$  calcd for  $\text{C}_{25}\text{H}_{18}\text{BrO}_3$   $[\text{M} + \text{H}]^+$  445.0434, found 445.0432.

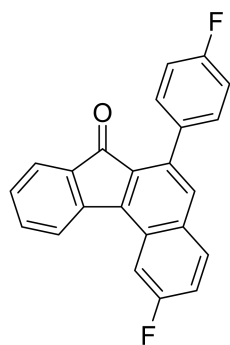

2-Fluoro-6-(4-fluorophenyl)-7H-benzo[c]fluoren-7-one (**3r**):

Obtained as a yellow solid (43.8 mg, 64% yield), eluting with 5% EtOAc in PE (elution gradient);  $^1\text{H}$  NMR (400 MHz,  $\text{CDCl}_3$ )  $\delta$  8.67 - 8.70 (dd,  $J = 2.4, 10.8$  Hz, 1H), 7.78 (s, 1H), 7.73 - 7.77 (dd,  $J = 2.0, 9.2$  Hz, 1H), 7.60 (d,  $J = 6.8$  Hz, 1H), 7.45 - 7.49 (m, 2H), 7.12 - 7.26 (m, 5H), 6.57 (d,  $J = 7.2$  Hz, 1H);  $^{13}\text{C}$  NMR (101 MHz,  $\text{CDCl}_3$ )  $\delta$  194.8, 163.3 (d,  $J = 249.1$  Hz), 162.8 (d,  $J = 246.2$  Hz), 144.5, 143.3, 136.6, 135.2, 134.8, 134.1 (d,  $J = 2.3$  Hz), 134.0, 132.8 (d,  $J = 9.7$  Hz), 131.1, 130.9 (d,  $J = 8.0$  Hz), 130.7 (d,  $J = 9.7$  Hz), 130.3 (d,  $J = 11.3$  Hz), 129.8, 129.2, 127.0, 123.8, 123.1, 117.7 (d,  $J = 26.0$  Hz), 115.7 (d,  $J = 21.3$  Hz), 108.0 (d,  $J = 22.7$  Hz);  $^{19}\text{F}$  NMR (400 MHz,  $\text{CDCl}_3$ )  $\delta$  -114.1, -118.6; HRMS (ESI-TOF)  $m/z$  calcd for  $\text{C}_{23}\text{H}_{13}\text{F}_2\text{O}$   $[\text{M} +$

$[H]^+ 343.0929$ , found  $343.0932$ .

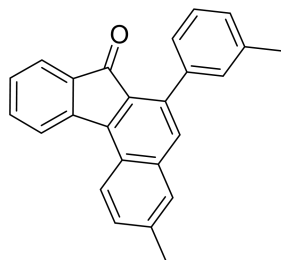

3-Methyl-6-(*m*-tolyl)-7H-benzo[*c*]fluoren-7-one (**3s**): Obtained as a yellow solid (46.1 mg, 69% yield), eluting with 5% EtOAc in PE (elution gradient);  $^1\text{H}$  NMR (400 MHz,  $\text{CDCl}_3$ )  $\delta$  8.45 (d,  $J = 8.8$  Hz, 1H), 8.07 (d,  $J = 7.6$  Hz, 1H), 7.64 (s, 1H), 7.60 (d,  $J = 7.2$  Hz, 1H), 7.55 (s, 1H), 7.51 (d,  $J = 7.6$  Hz, 1H), 7.45 (d,  $J = 8.4$  Hz, 1H), 7.35 - 7.38 (m, 3H), 7.31 (d,  $J = 7.6$  Hz, 1H), 7.26 (s, 1H), 2.55 (s, 3H), 2.45 (s, 3H);  $^{13}\text{C}$  NMR (101 MHz,  $\text{CDCl}_3$ )  $\delta$  193.5, 144.1, 144.1, 139.0, 138.2, 138.0, 137.8, 137.3, 135.1, 134.8, 134.6, 134.1, 130.6, 130.0, 129.5, 128.8, 128.5, 128.4, 127.6, 126.6, 124.5, 123.7, 123.2, 21.8, 21.5; HRMS (ESI-TOF)  $m/z$  calcd for  $\text{C}_{25}\text{H}_{19}\text{O}$   $[M + H]^+ 335.1430$ , found 335.1431.

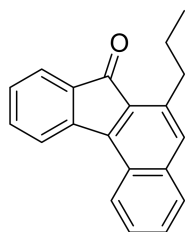

6-propyl-7H-benzo[*c*]fluoren-7-one (**3t**): Obtained as a yellow liquid (39.2 mg, 72% yield), eluting with 20% EtOAc in PE (elution gradient);  $^1\text{H}$  NMR (400 MHz,  $\text{CDCl}_3$ )  $\delta$  8.45 - 8.48 (m, 1H), 8.02 (d,  $J = 7.6$  Hz, 1H), 7.78 - 7.80 (m, 1H), 7.64 (d,  $J = 7.2$  Hz, 1H), 7.48 - 7.55 (m, 4H), 7.26 - 7.31 (m, 1H), 3.13 - 3.17 (t, 2H), 1.69 - 1.78 (m, 2H), 1.02 - 1.05 (t, 3H);  $^{13}\text{C}$  NMR (101 MHz,  $\text{CDCl}_3$ )  $\delta$  195.3, 144.4, 143.8, 139.2, 137.7, 134.6, 134.2, 130.2, 129.4, 128.9, 128.6, 128.3, 127.7, 126.8, 124.6, 123.6, 123.2, 33.8, 24.0, 14.1; HRMS (ESI-TOF)  $m/z$  calcd for  $\text{C}_{20}\text{H}_{17}\text{O}$   $[M + H]^+ 273.1279$ , found 273.1276.

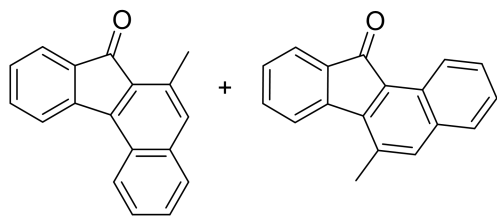

6-Methyl-7H-benzo[a]fluoren-7-one (**3u**),

6-Methyl-11H-benzo[c]fluoren-11-one (**3u'**). Mixture cannot separate. Obtained as a yellow liquid (37.1 mg, 76% yield), eluting with 5% EtOAc in PE (elution gradient);  $^1\text{H}$  NMR (400 MHz,  $\text{CDCl}_3$ )  $\delta$  8.94 (d,  $J = 8.4$  Hz, 1.0H), 8.40 - 8.43 (m, 2.3H), 7.98 (d,  $J = 7.6$  Hz, 2.4H), 7.73 - 7.75 (m, 2.3H), 7.57 - 7.68 (m, 7.4H), 7.50 - 7.53 (m, 6.0H), 7.47 - 7.48 (m, 4.7H), 7.36 - 7.41 (m, 3.1H), 7.28 (d,  $J = 7.2$  Hz, 2.4H), 7.23 - 7.26 (m, 2.9H), 2.73 (s, 6.5H), 2.70 (s, 3.0H);  $^{13}\text{C}$  NMR (101 MHz,  $\text{CDCl}_3$ )  $\delta$  195.5, 195.4, 145.2, 144.5, 144.3, 143.4, 137.7, 136.6, 134.9, 134.6, 134.3, 134.2, 134.2, 134.1, 131.2, 130.8, 129.7, 129.5, 128.7, 128.7, 128.6, 128.5, 128.3, 127.6, 127.5, 126.8, 126.5, 124.6, 124.2, 123.7, 123.6, 123.2, 123.1, 20.9, 18.5; HRMS (ESI-TOF)  $m/z$  calcd for  $\text{C}_{18}\text{H}_{13}\text{O}$   $[\text{M} + \text{H}]^+ 245.0961$ , found 245.0963.

## References

- (1) (a) Zeng, Q.; Gao, F.; Benet-Buchholz, J.; Kleij, A. W. Stereoselective ThreeComponent Allylic Alkylation Enabled by Dual Photoredox/Ni Catalysis. *ACS Catal.* **2023**, *13*, 7514. (b) Cheng, Y. Y.; Yu, J. X.; Lei, T.; Hou, H. Y.; Chen, B.; Tung, C. H.; Wu, L. Z. Direct 1, 2-Dicarbonylation of Alkenes towards 1, 4-Diketones via Photocatalysis. *Angewandte Chemie.* **2021**, *133*, 27026. (c) Tong, X.; Wu, Z.; Wu, Z.; Ang, H. T.; Miao, Y.; Lu, Y.; Wu, J. Photocatalytic Reductive Functionalization of Aryl Alkynes via Alkyne Radical Anions. *ACS Catal.* **2024**, *14*, 9283-9293. (d) Kaper, T.; Fischer, M.; Thye, H.; Geik, D.; Schmidtman, M.; Beckhaus, R.; Doye, S. Intermolecular Hydroaminoalkylation of Alkynes. *Chem. Eur. J.* **2021**, *27*, 6899-6903. (d) Till, N. A.; Smith, T. R.; Smith, T. R.; MacMillan, D. W. C. Decarboxylative Hydroalkylation of Alkynes. *J. Am. Chem. Soc.* **2018**, *140*, 5701-5705. (e) Sakabe, K.; Tsurugi, H.; Hirano, K.; Satoh, T.; Miura, M. Rhodium/Phosphine/Amine·HBr Catalyst System for Highly Selective Cross Cyclodimerization of Aryl- and



Alkylalkynes: Efficient Access to Multisubstituted Naphthalene Derivatives. *Chem. Eur. J.* **2010**, *16*, 445-449. (f) Huang, L.-Y.; Aulwurm, U. R.; Heinemann, F. W.; Kisch, H. Rhodium-Catalyzed Synthesis of Naphthalene Derivatives Through Cyclodimerization of Arylalkynes. *Eur. J. Inorg. Chem.* **1998**, 1998, 1951- 1957.

## Copies of $^1\text{H}$ and $^{13}\text{C}$ NMR spectra of products

### $^1\text{H}$ NMR and $^{13}\text{C}$ NMR of 3a

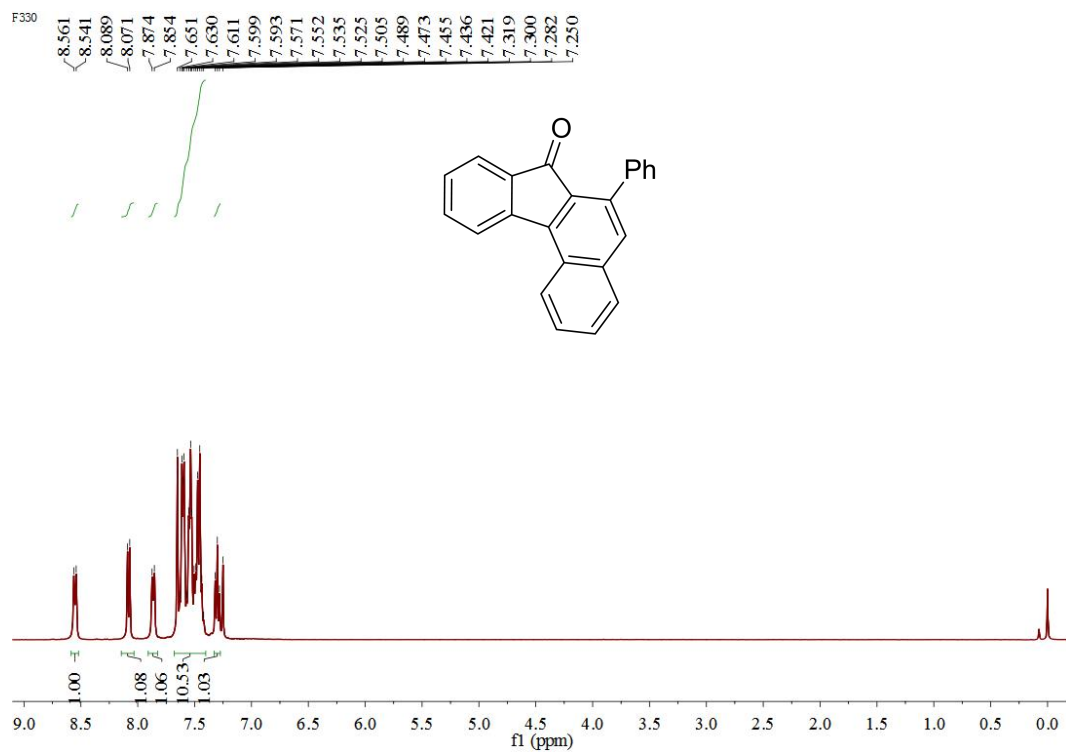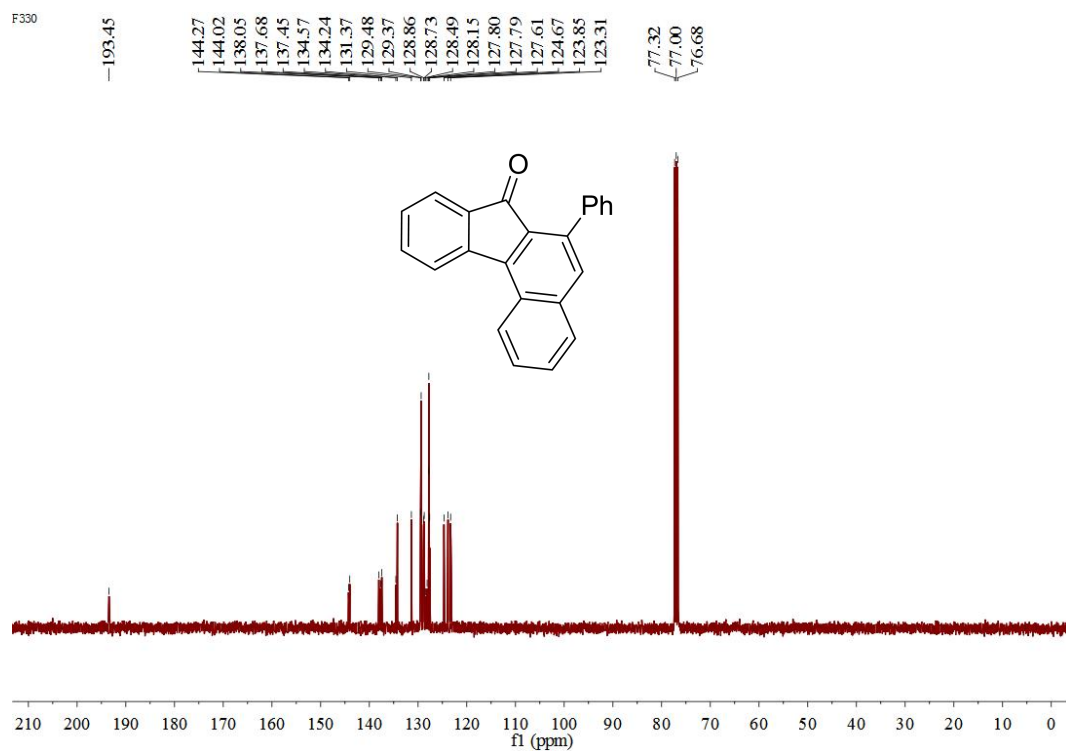

# <sup>1</sup>H NMR and <sup>13</sup>C NMR of 3b

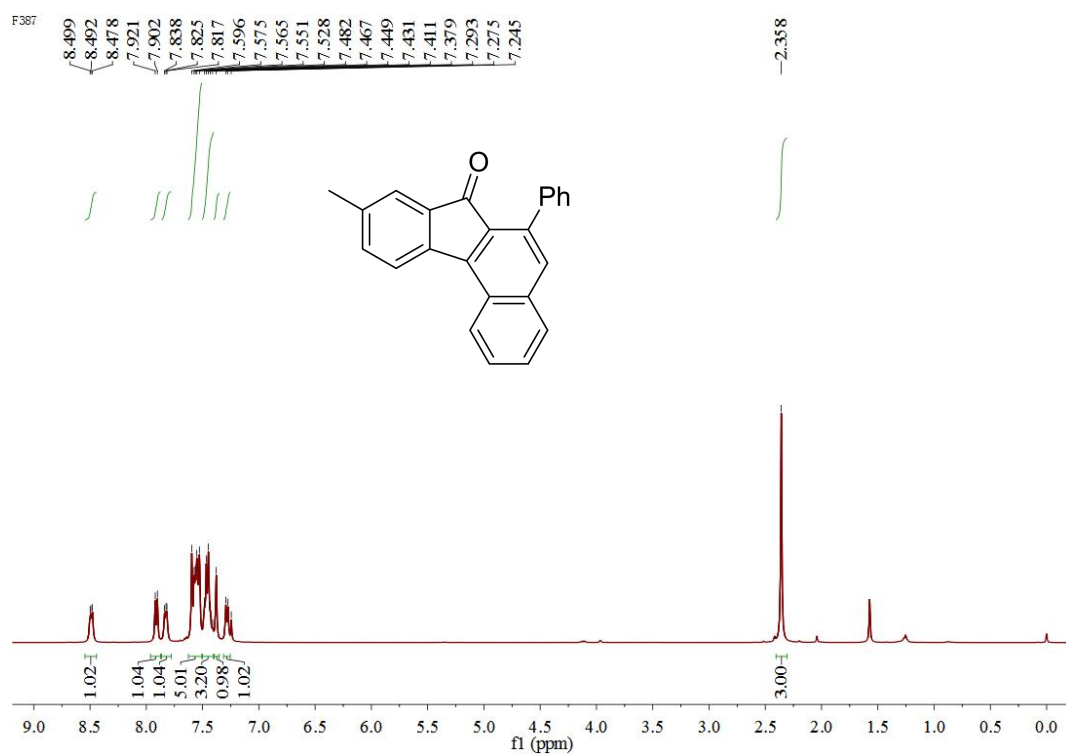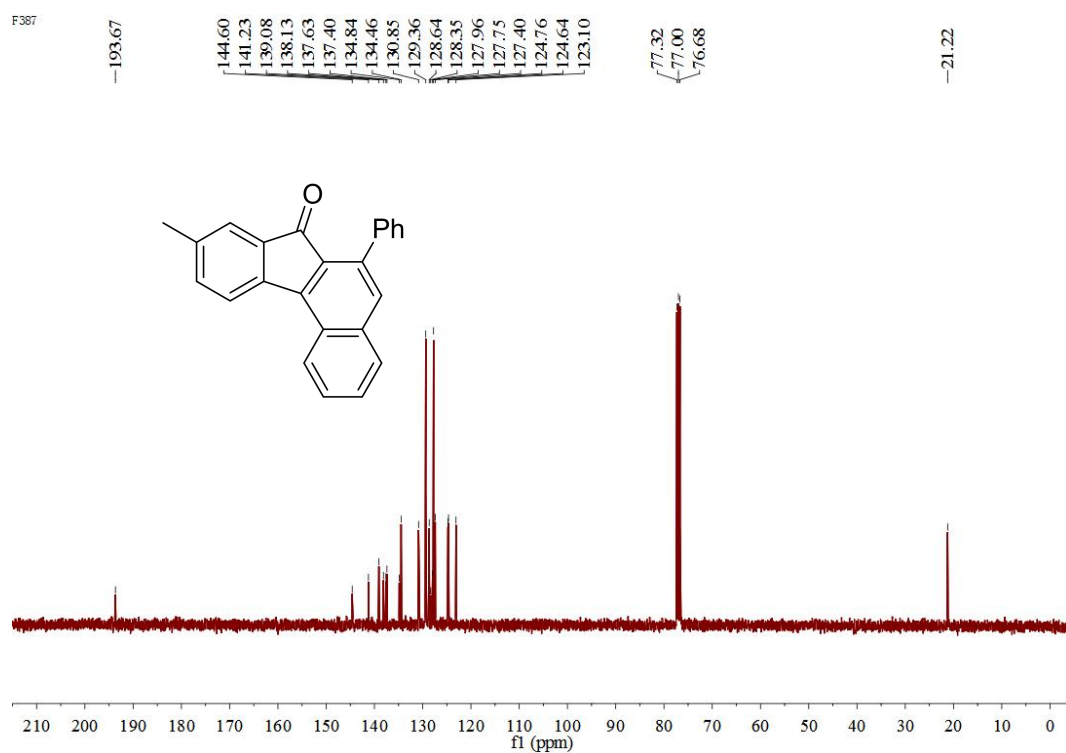

# <sup>1</sup>H NMR and <sup>13</sup>C NMR of 3c

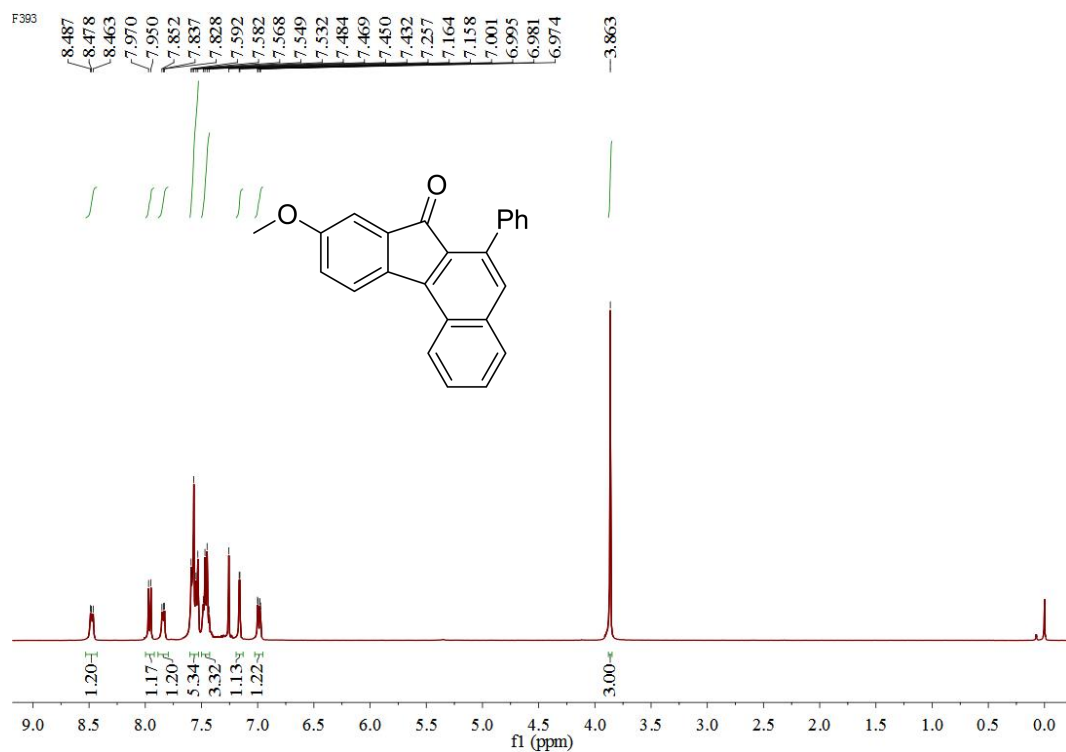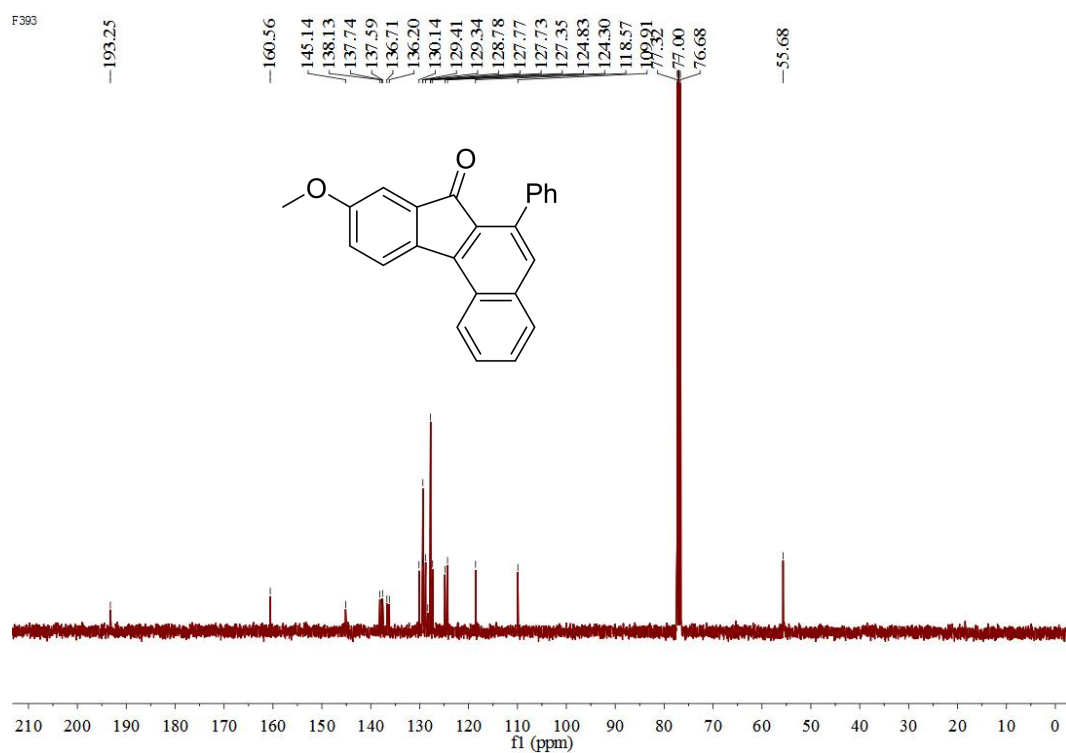

# <sup>1</sup>H NMR, <sup>13</sup>C NMR and <sup>19</sup>F NMR of 3d

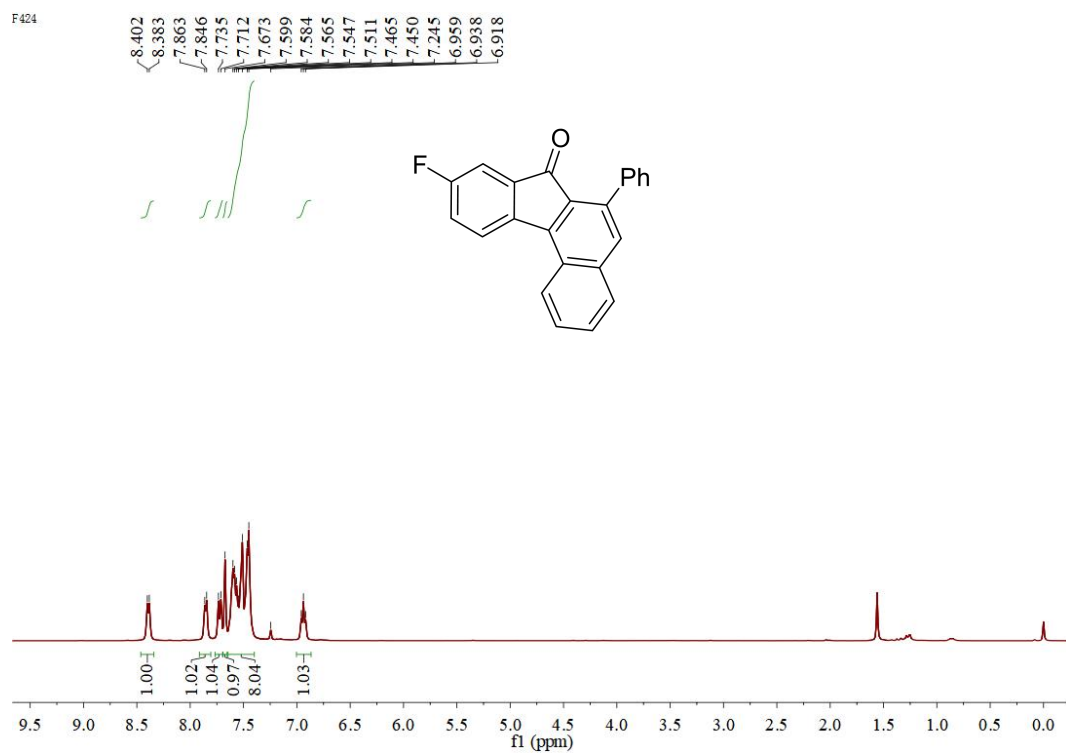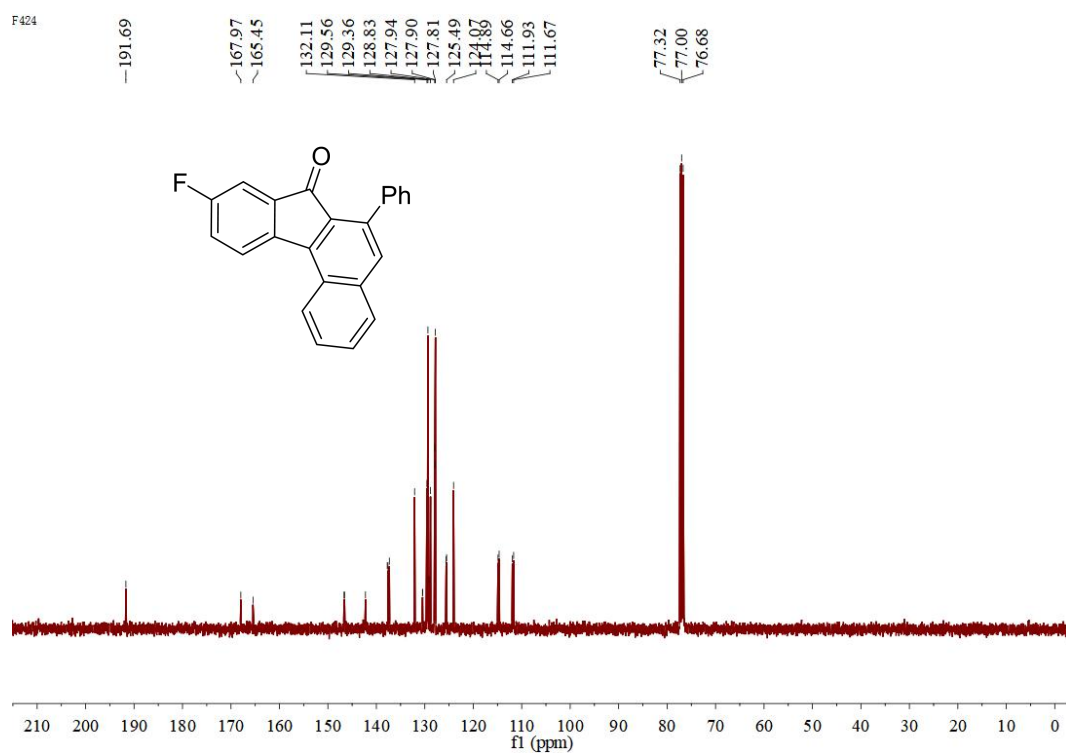

F424

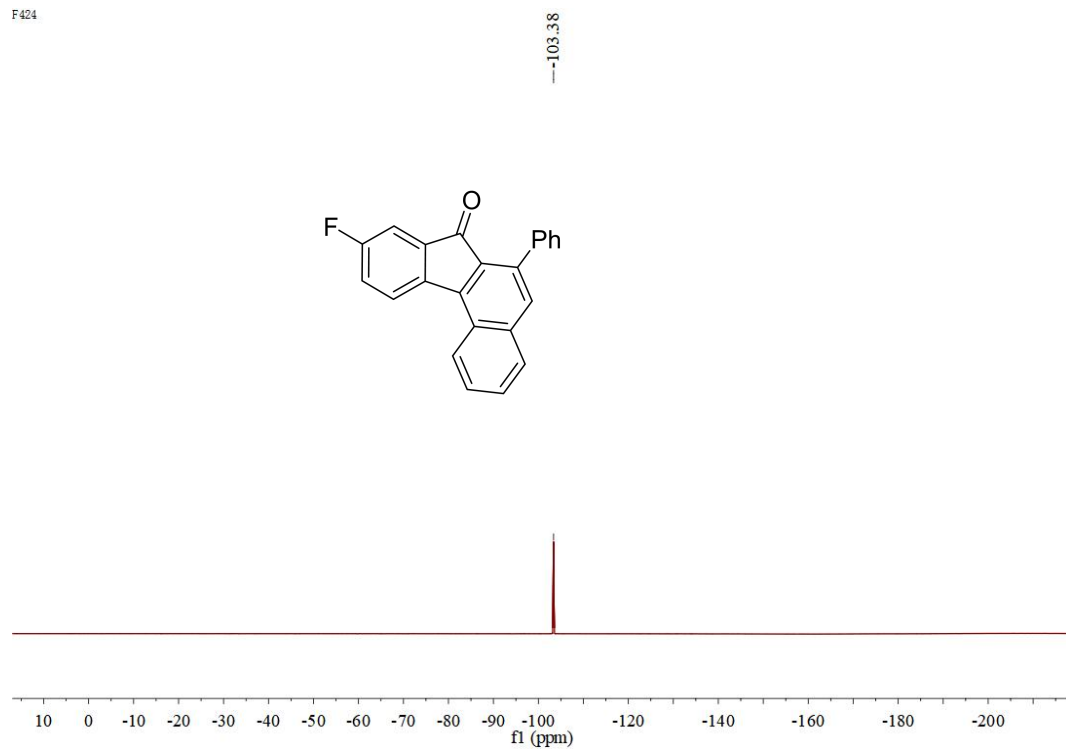

# <sup>1</sup>H NMR and <sup>13</sup>C NMR of 3e

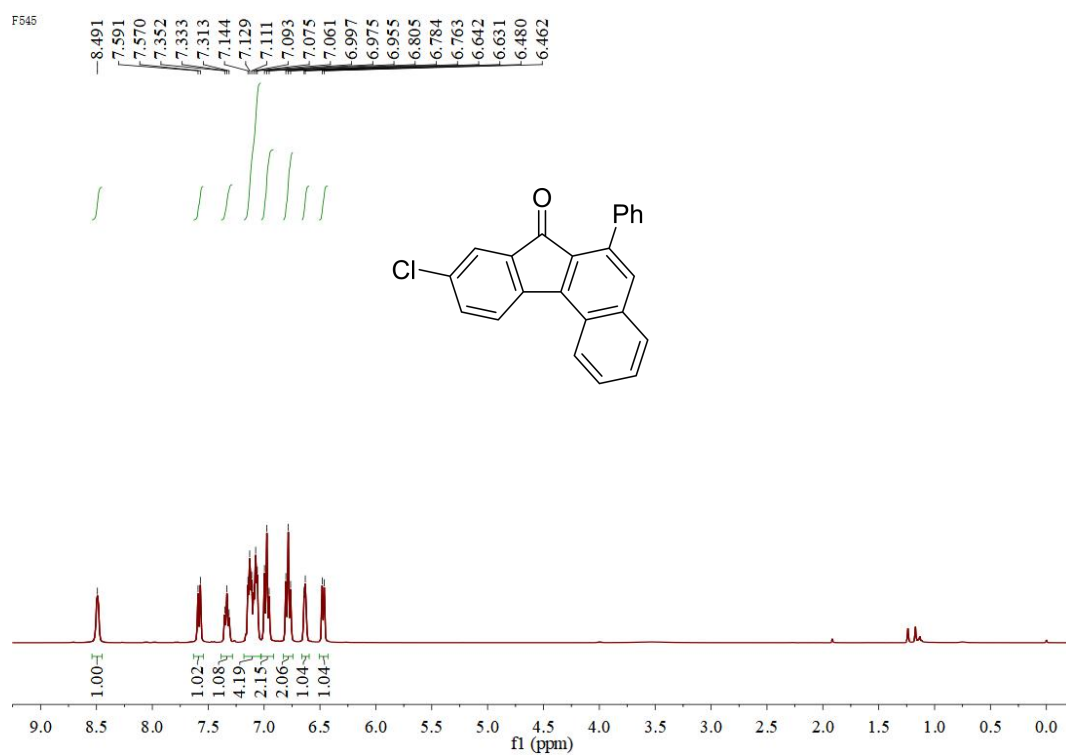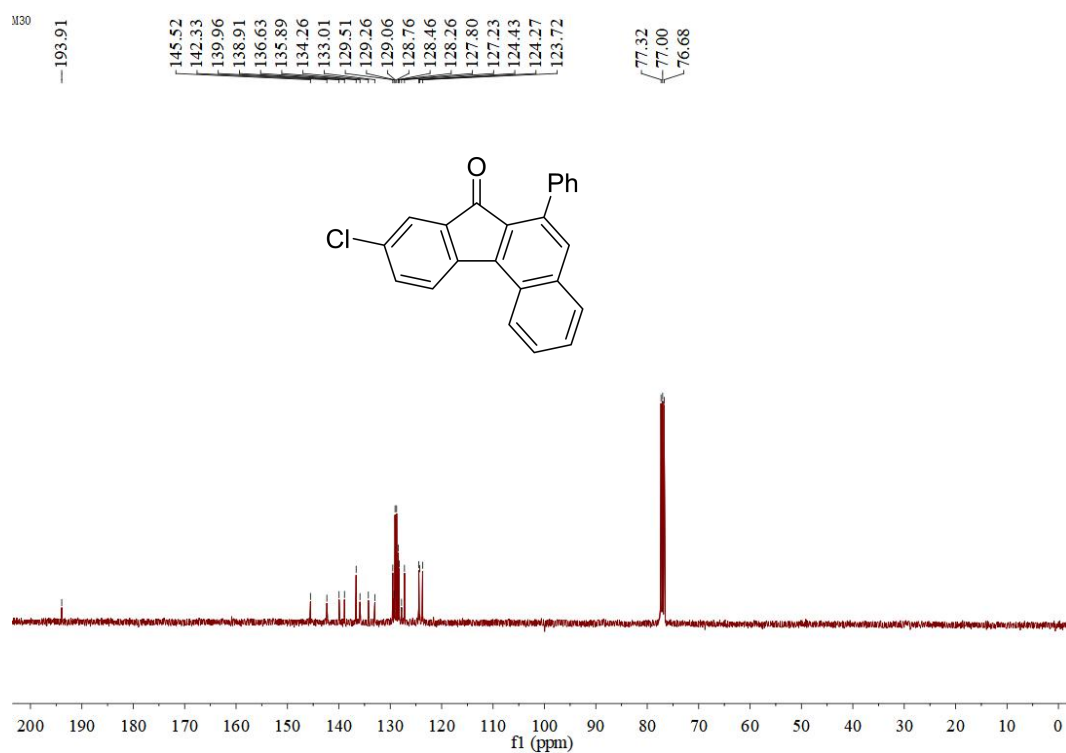

**$^1\text{H}$  NMR,  $^{13}\text{C}$  NMR and  $^{19}\text{F}$  NMR of 3f**

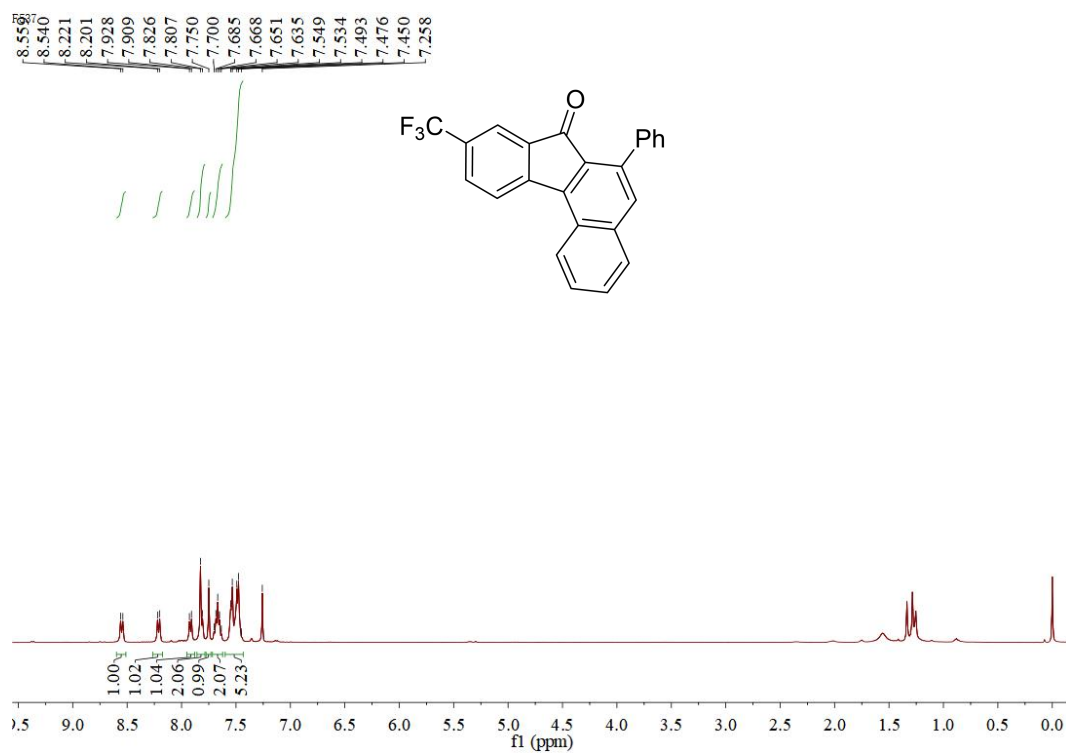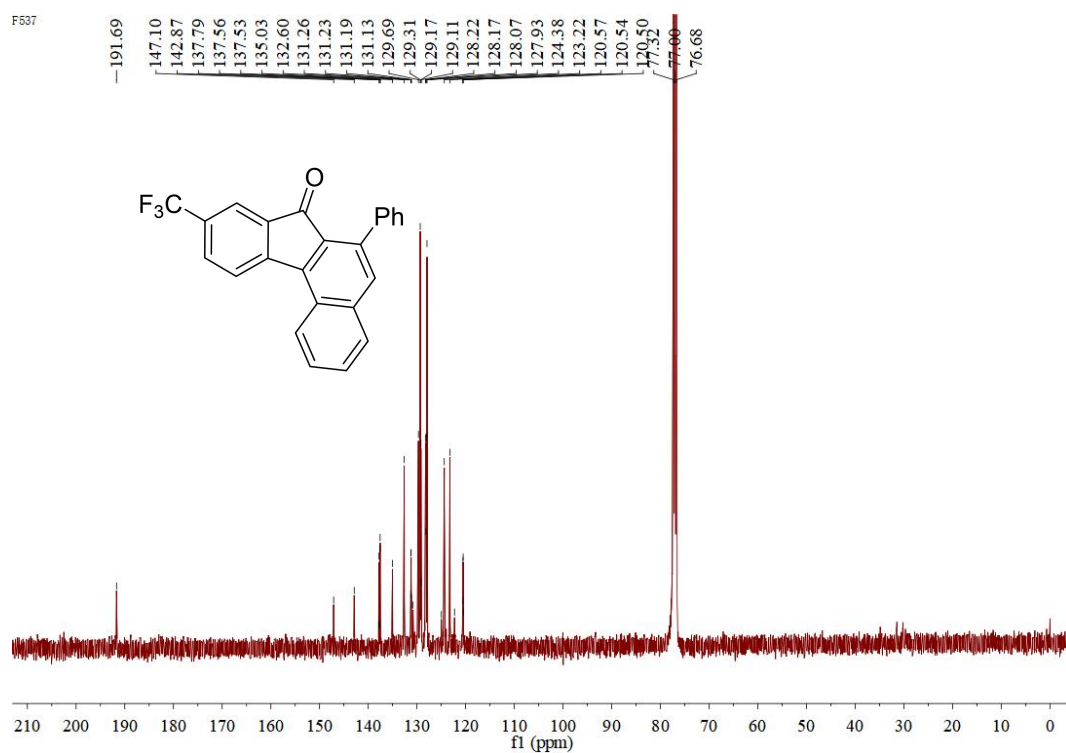



F537

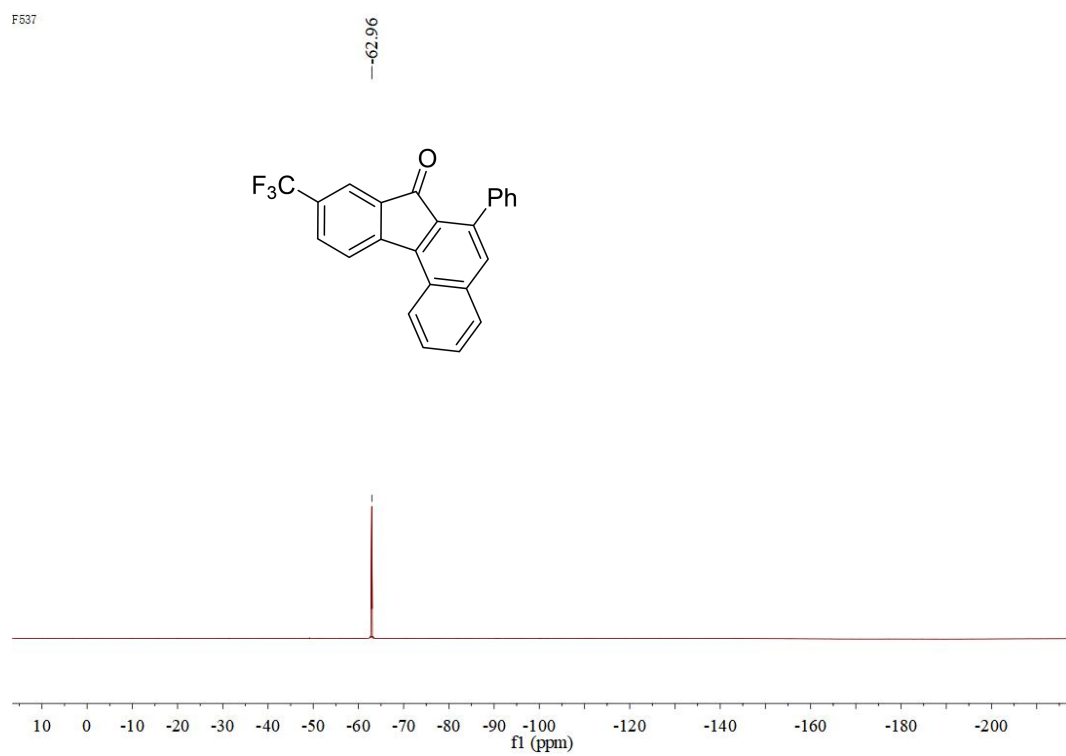

# <sup>1</sup>H NMR, and <sup>13</sup>C NMR of 3g

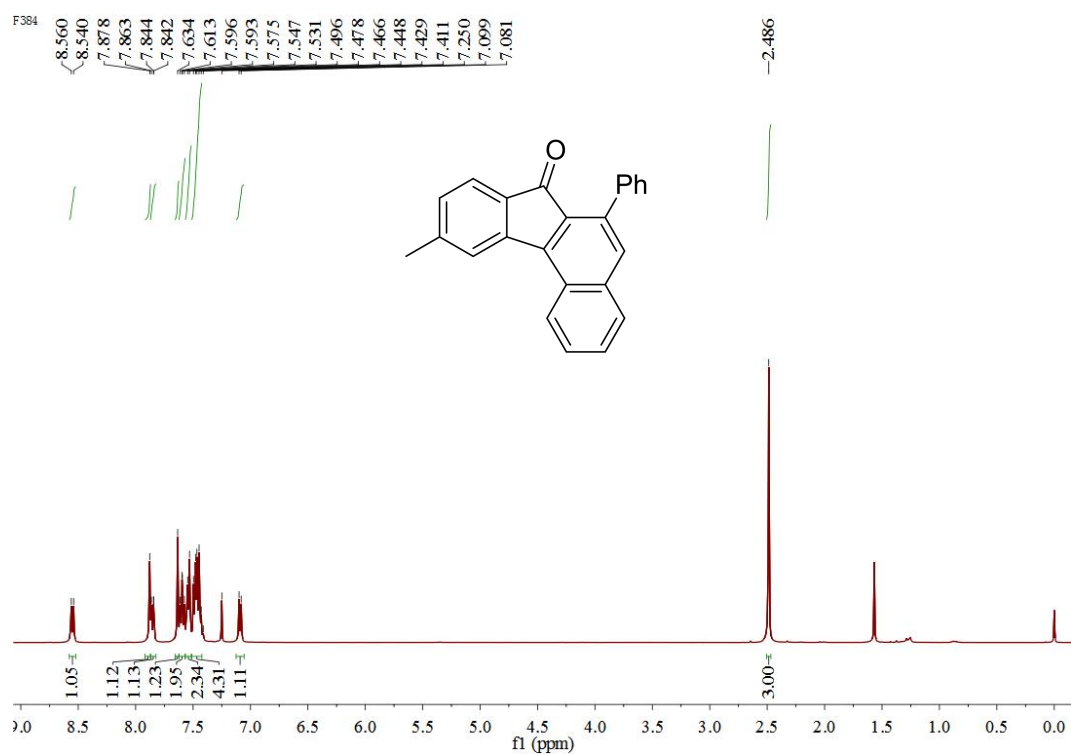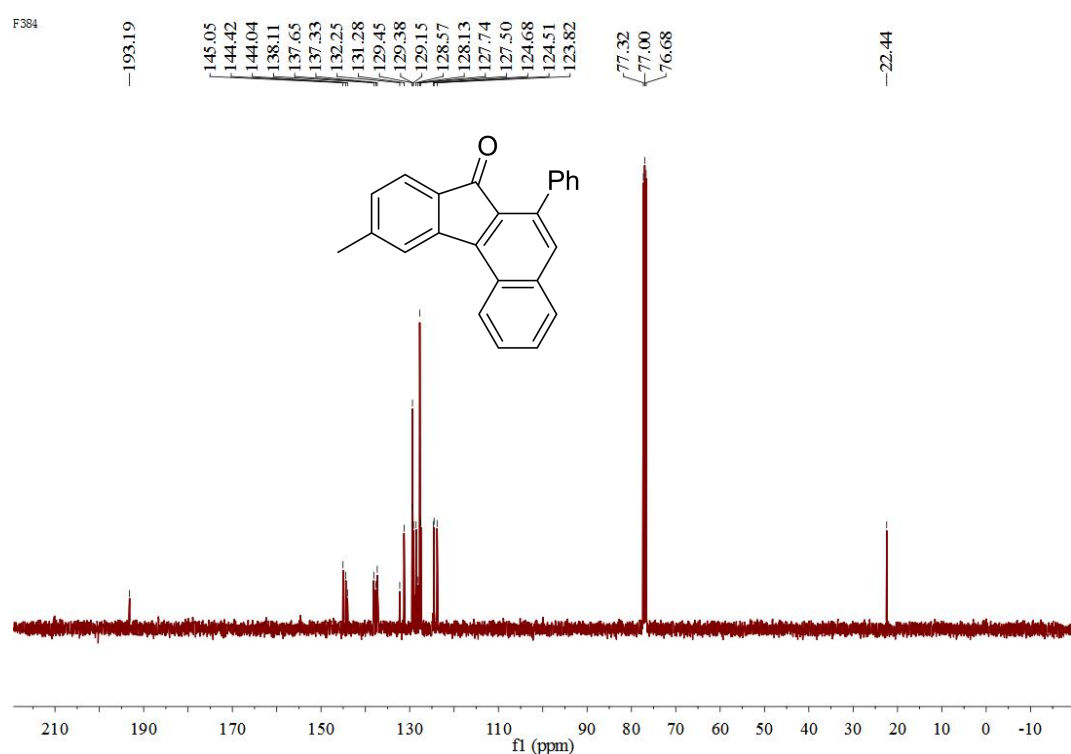

# <sup>1</sup>H NMR, and <sup>13</sup>C NMR of 3h

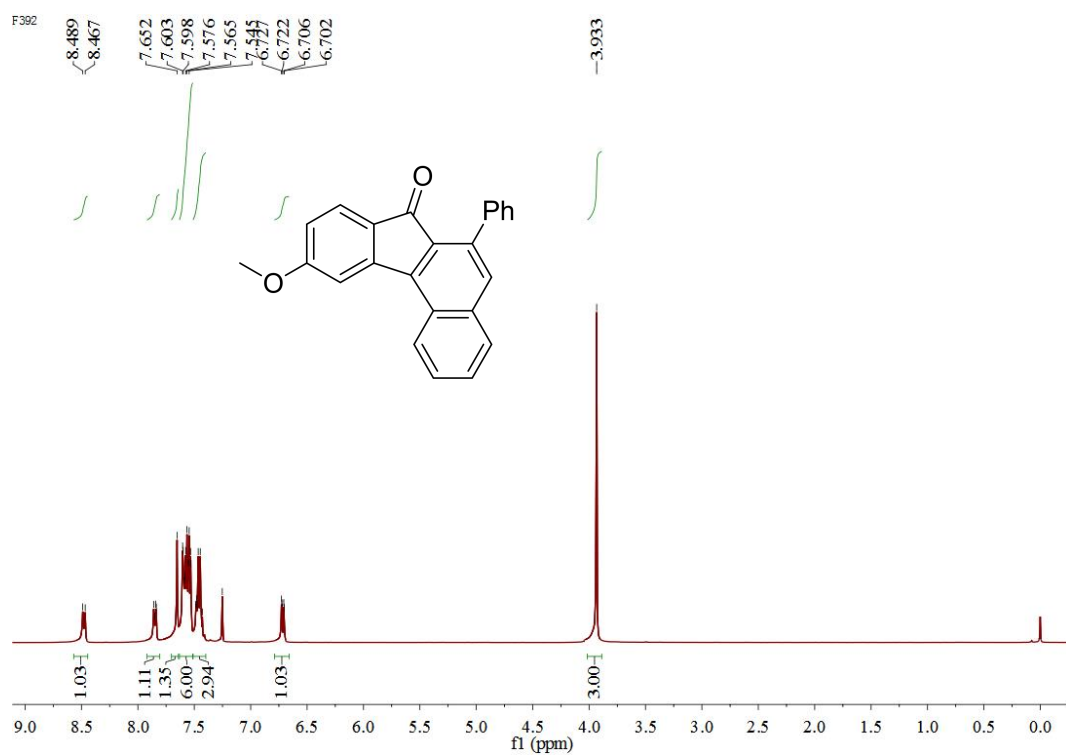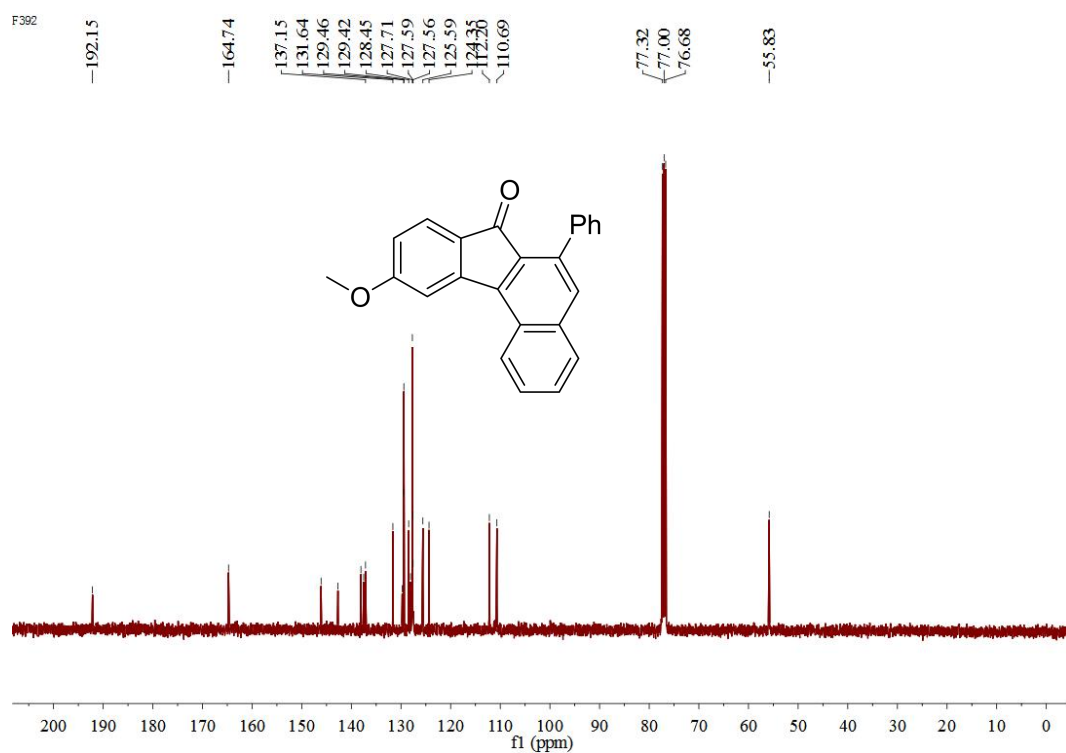

# <sup>1</sup>H NMR, <sup>13</sup>C NMR and <sup>19</sup>F NMR of 3i

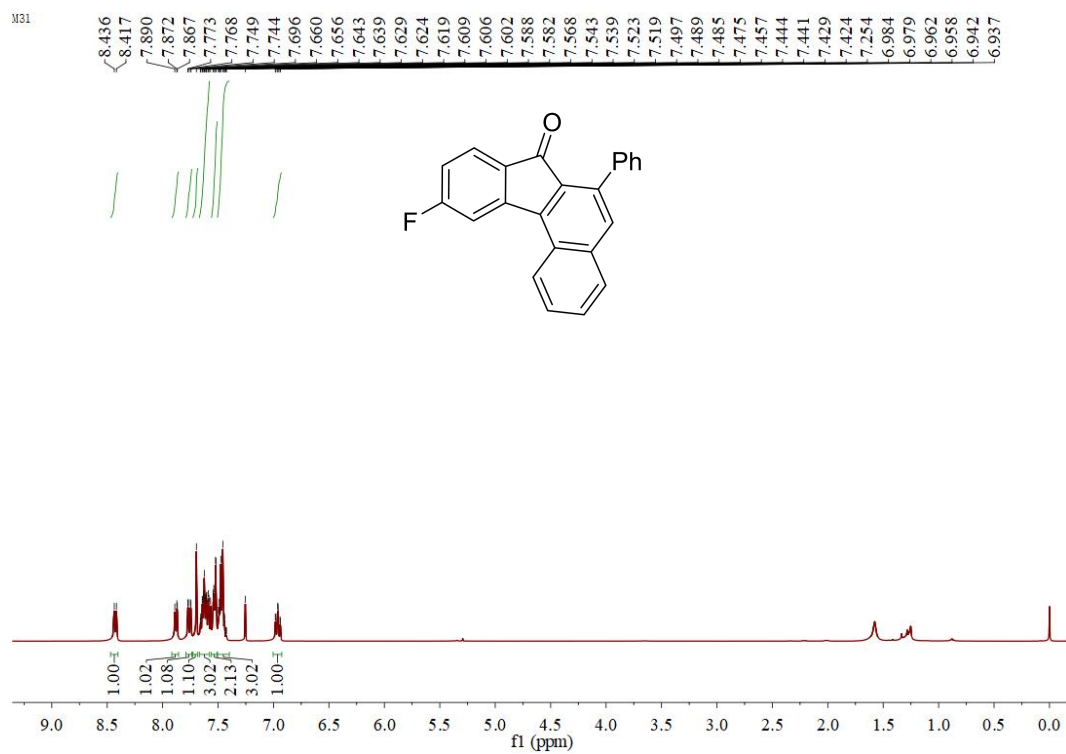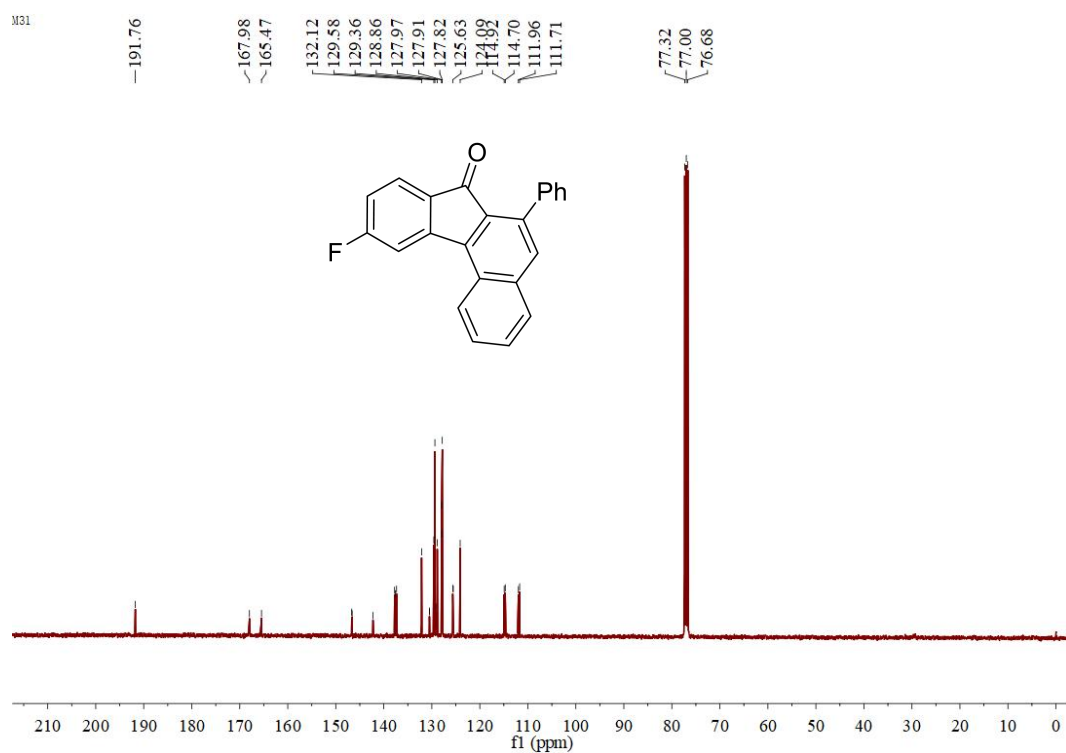

M31

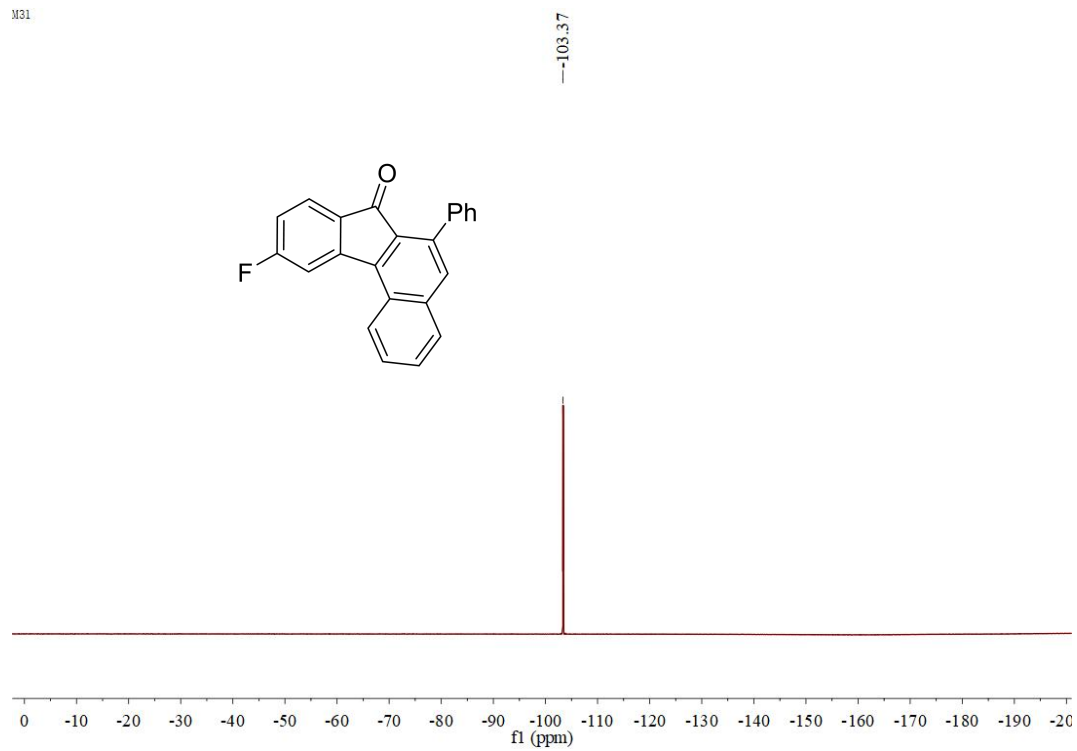

# <sup>1</sup>H NMR, and <sup>13</sup>C NMR of 3j

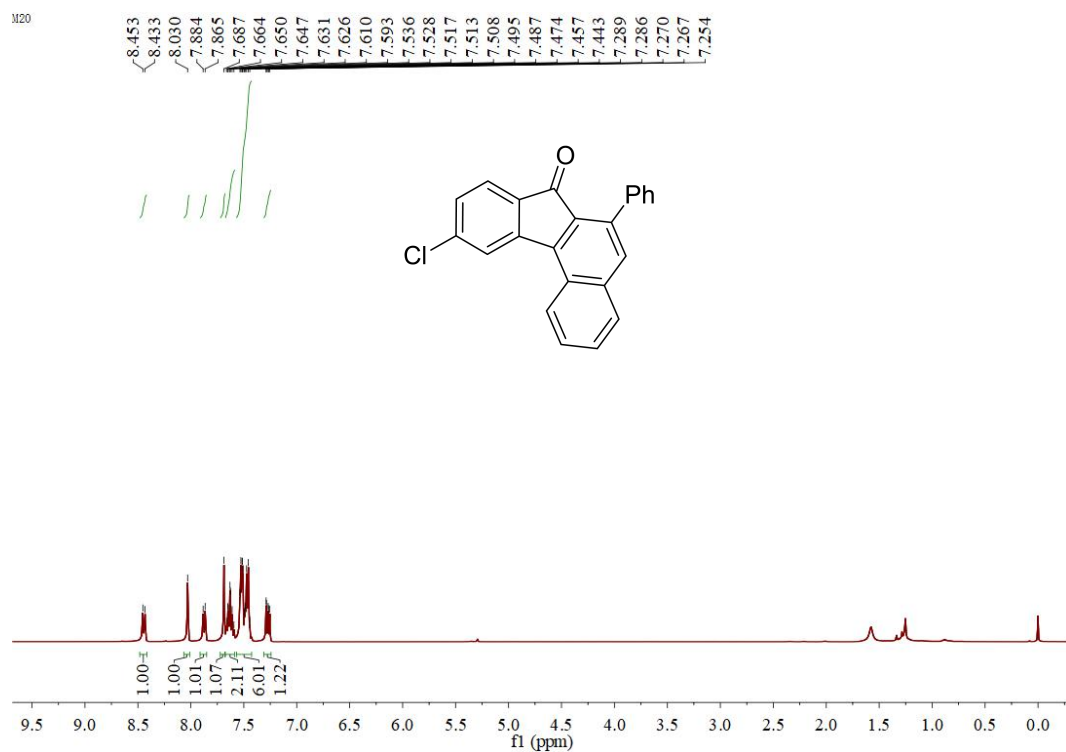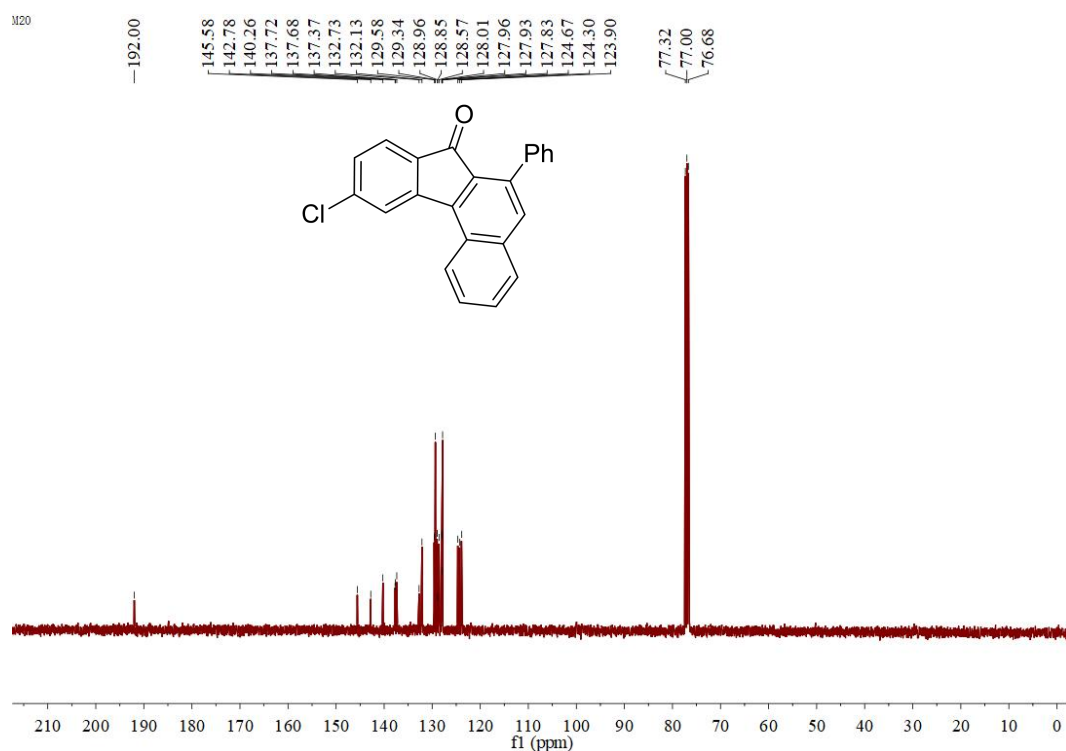

# <sup>1</sup>H NMR, and <sup>13</sup>C NMR of 3k

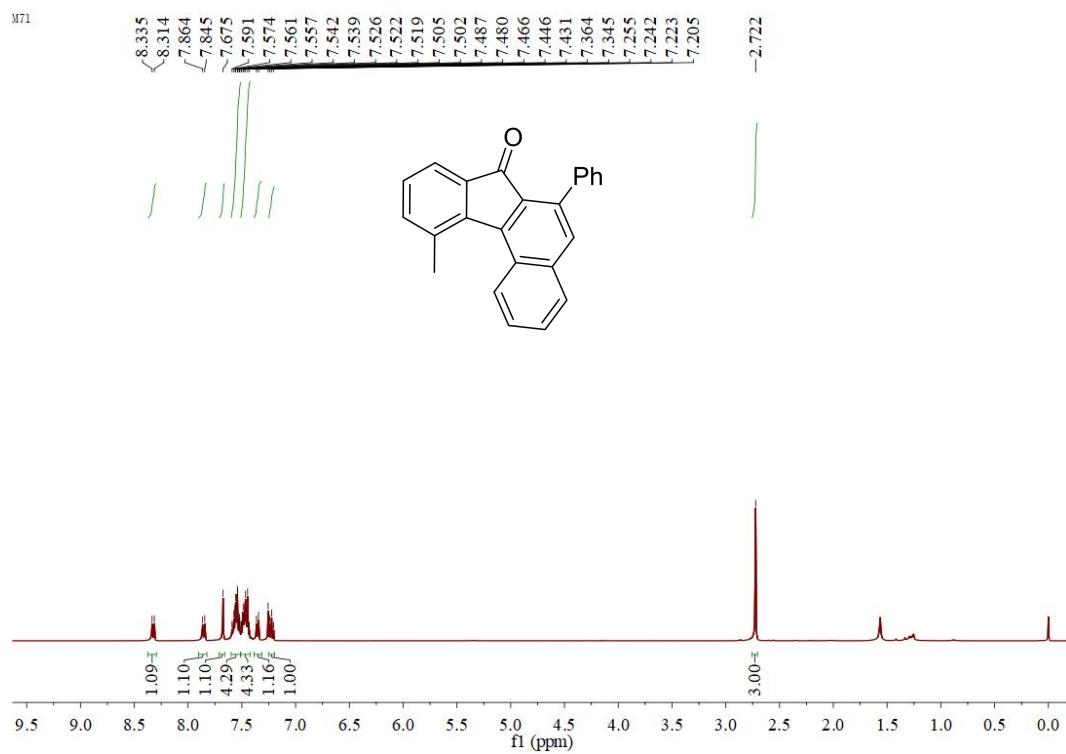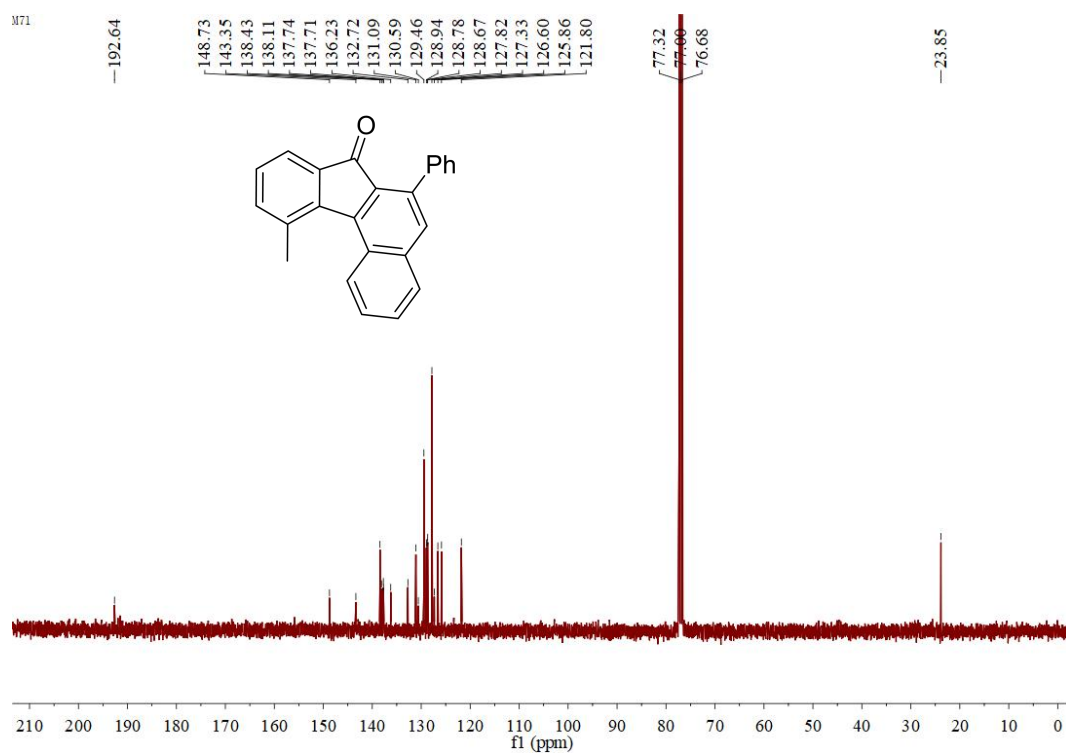

# <sup>1</sup>H NMR, <sup>13</sup>C NMR and <sup>19</sup>F NMR of 3l

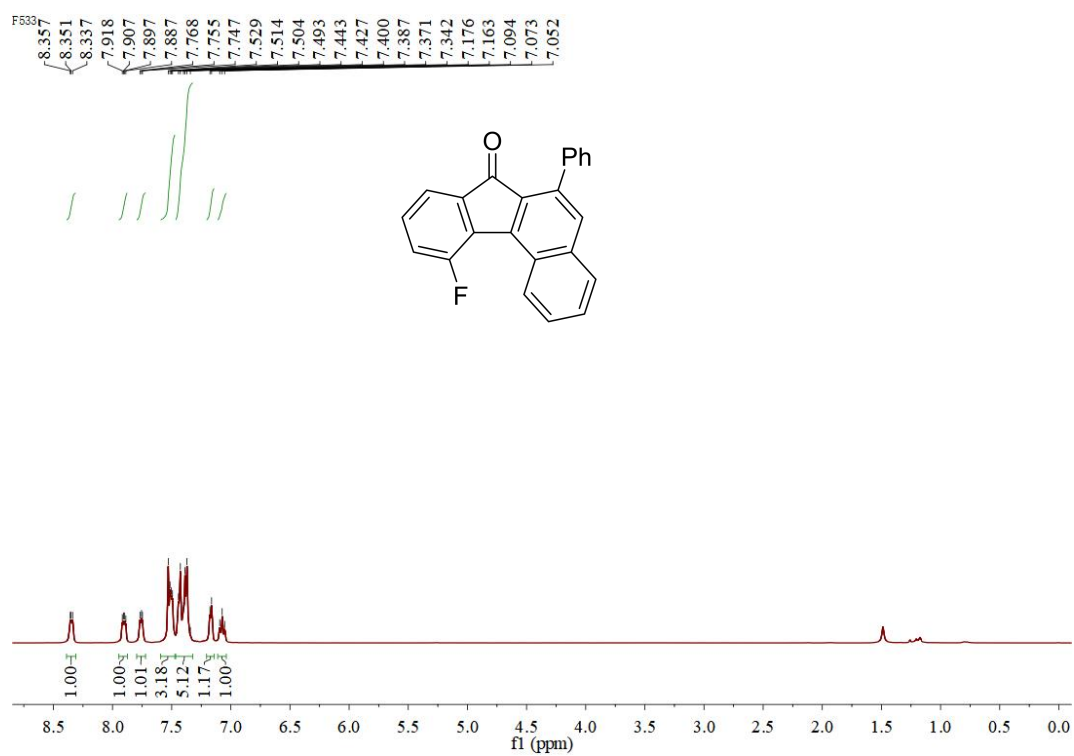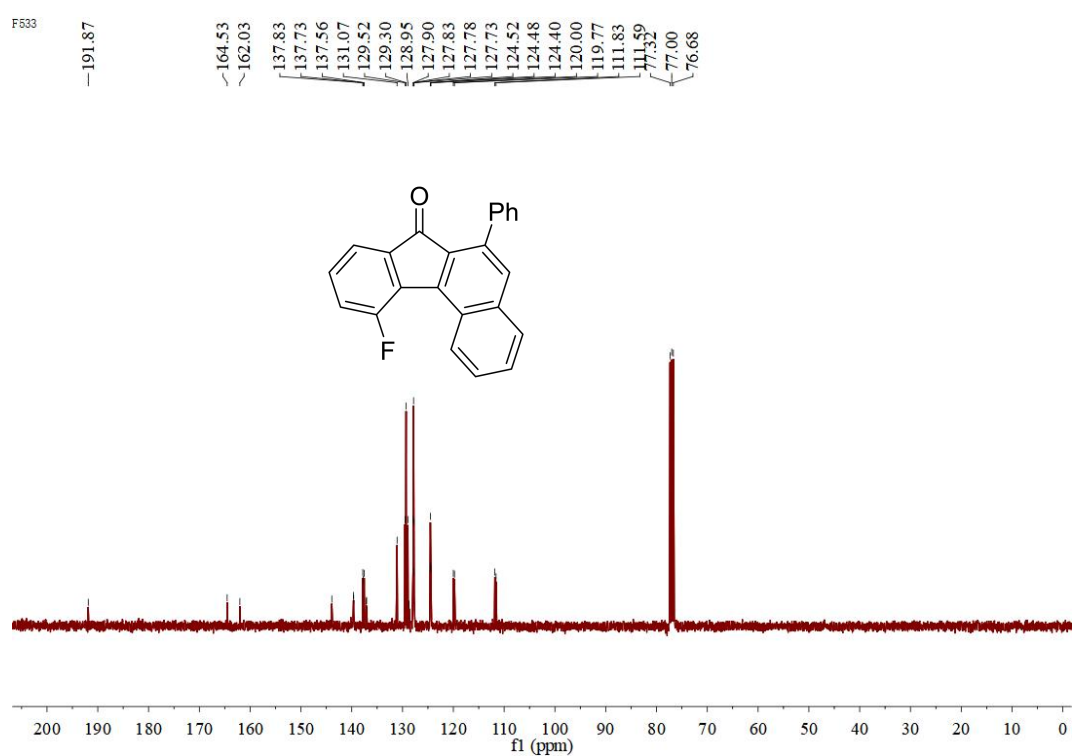



F533

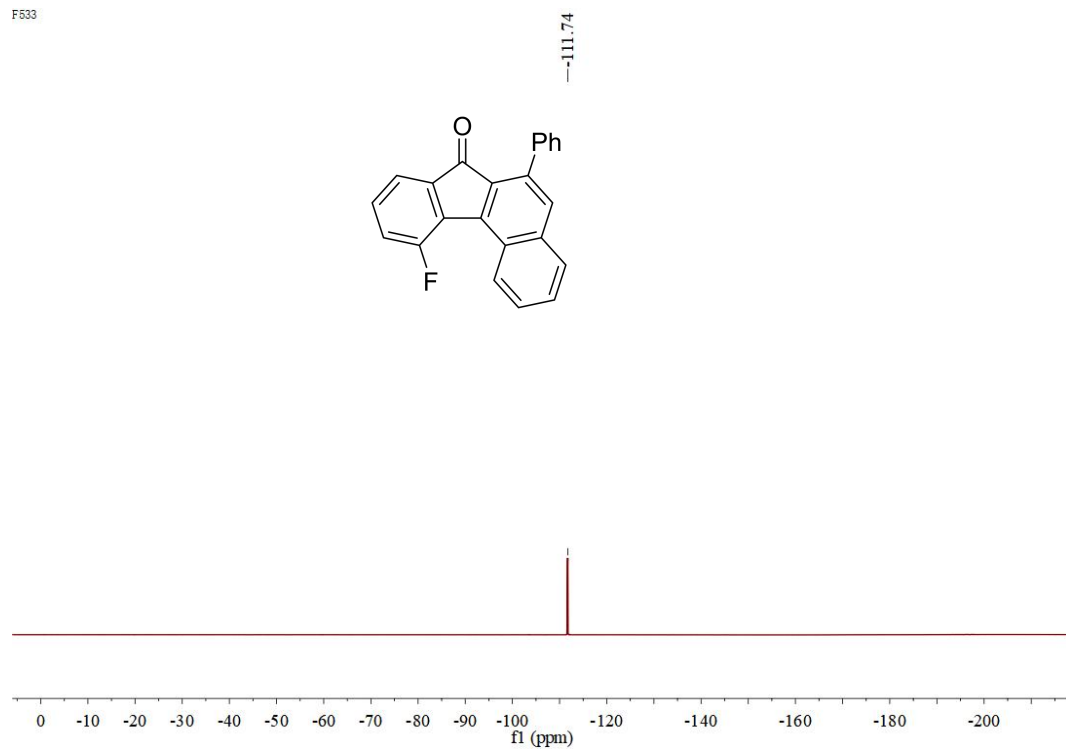

# <sup>1</sup>H NMR, <sup>13</sup>C NMR and <sup>19</sup>F NMR of 3m

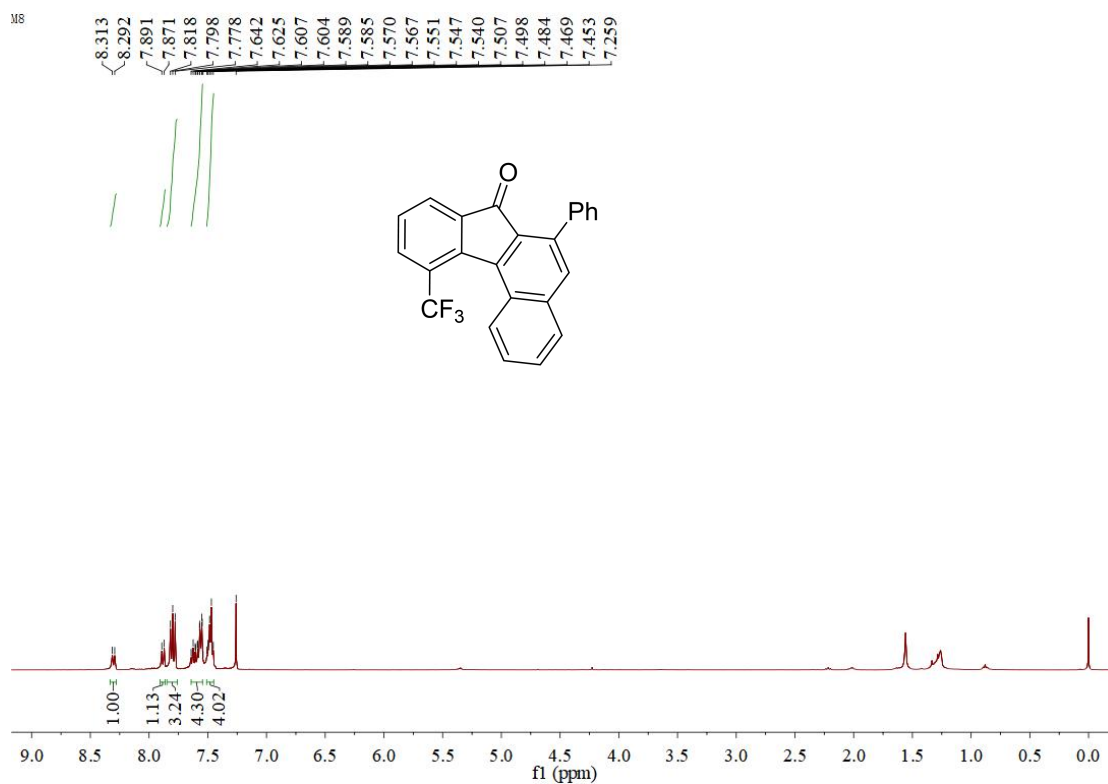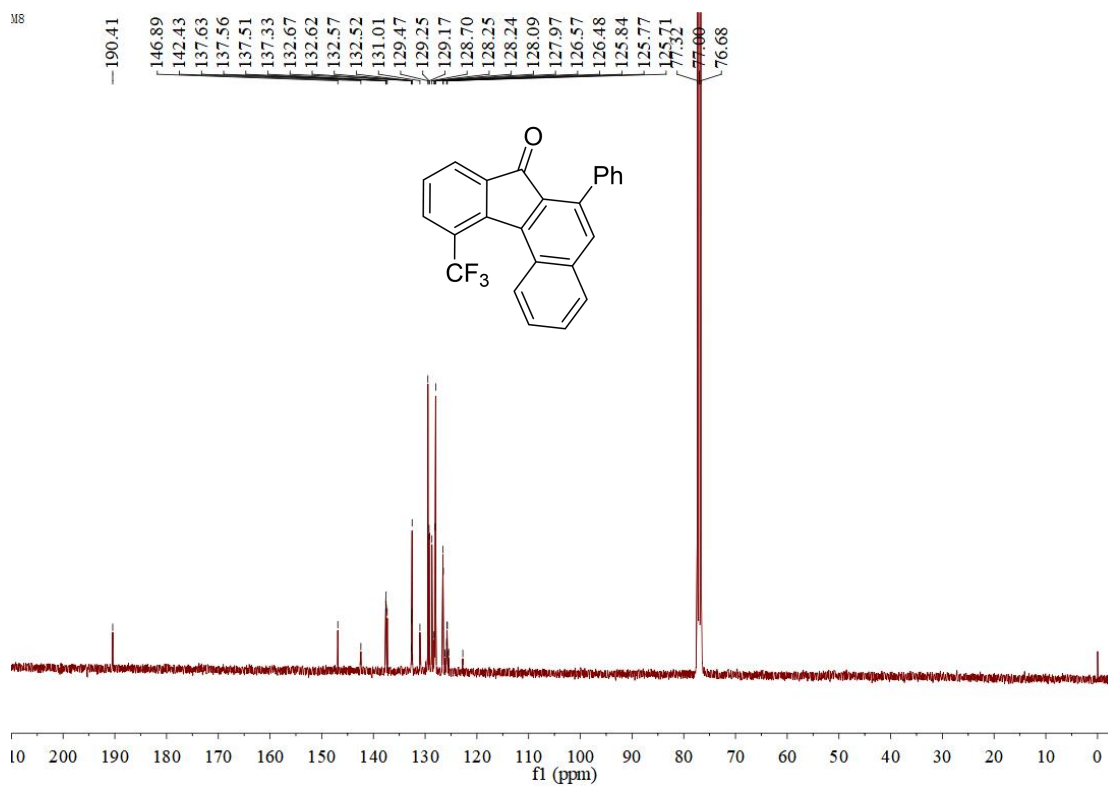

MS

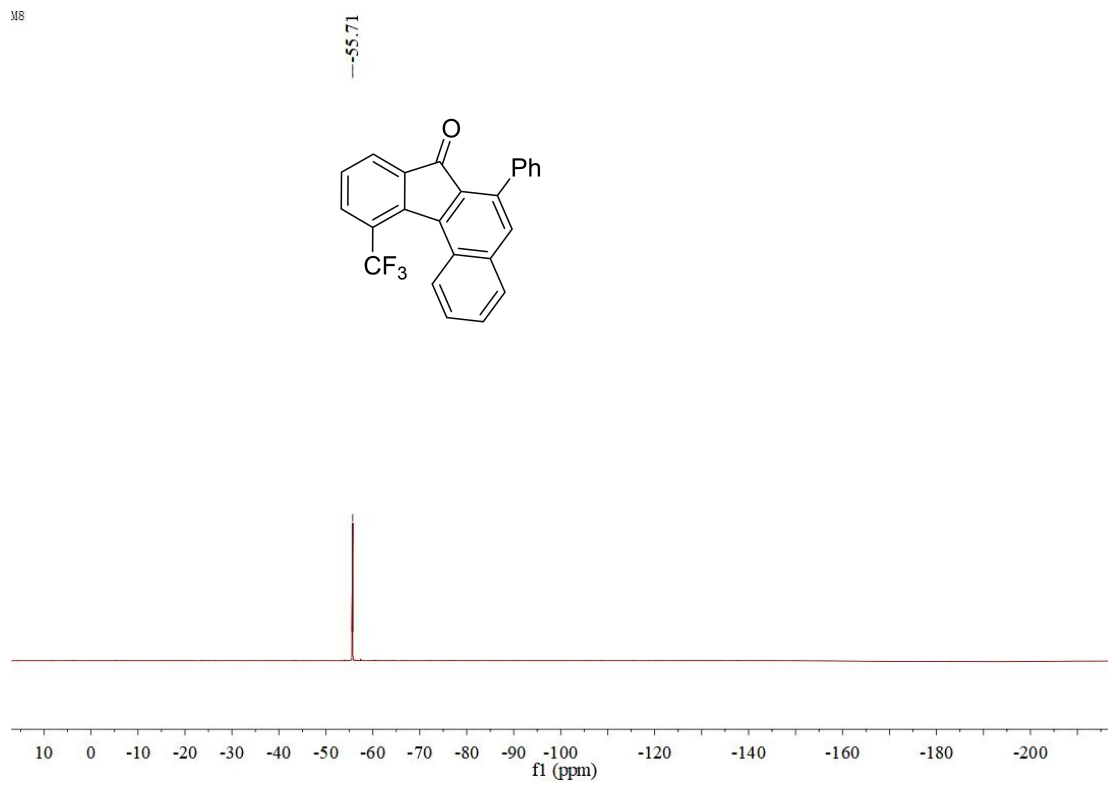

# <sup>1</sup>H NMR, <sup>13</sup>C NMR and <sup>19</sup>F NMR of 3n

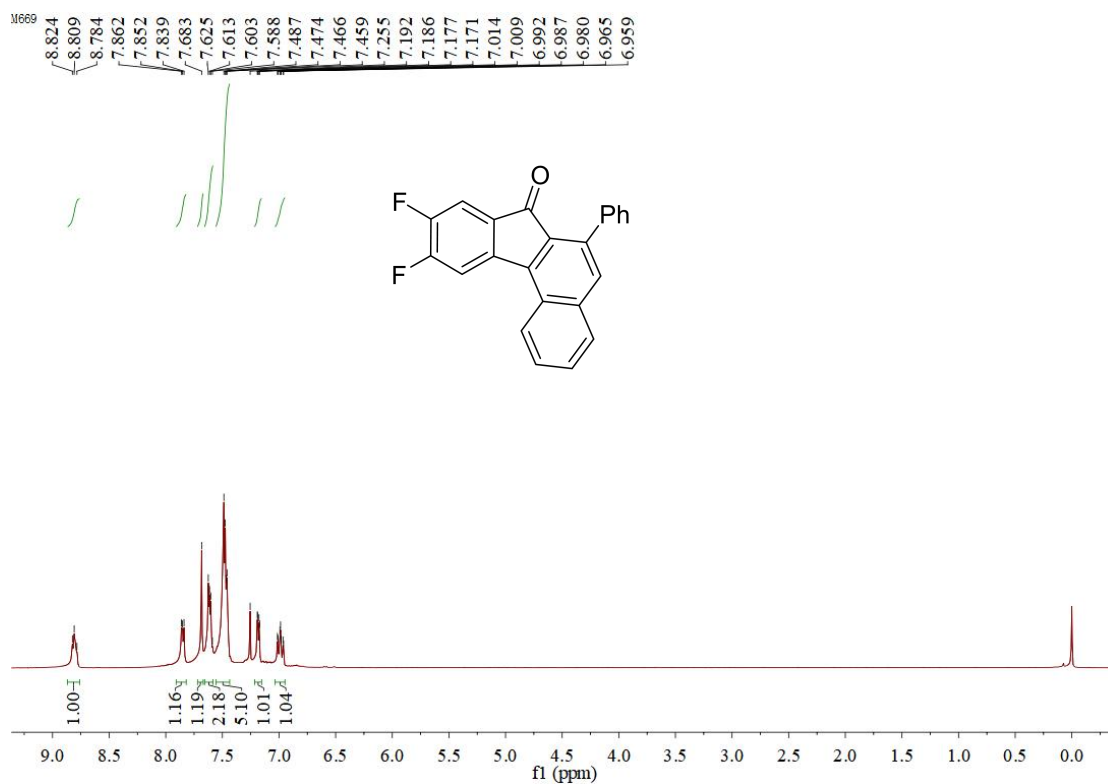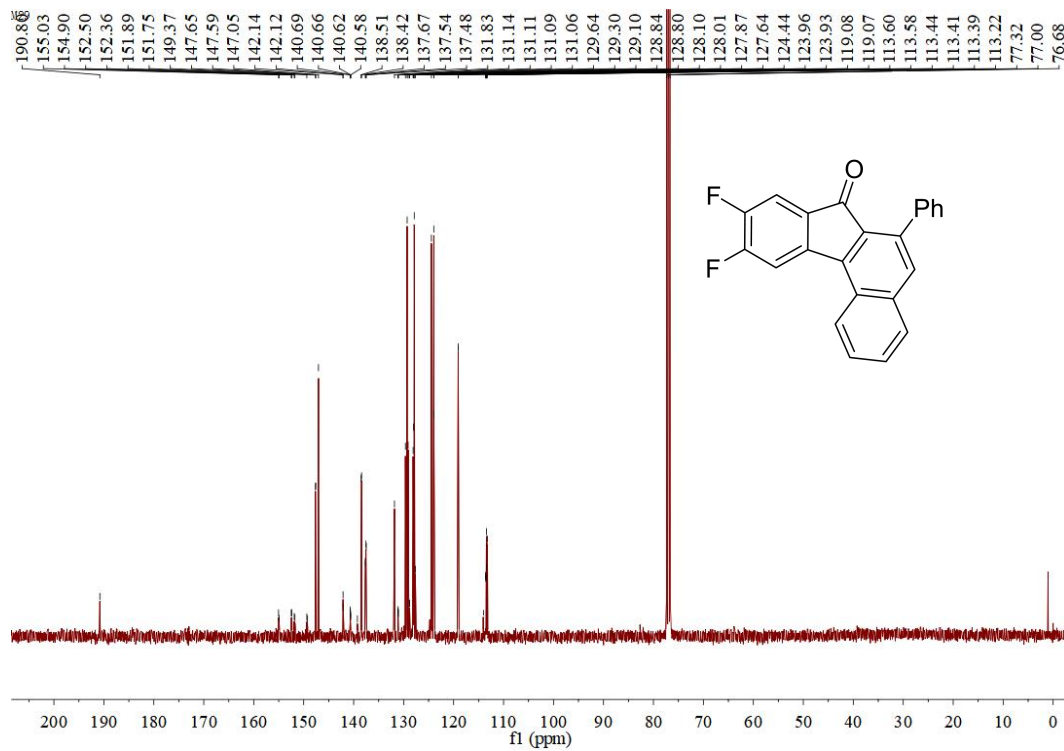

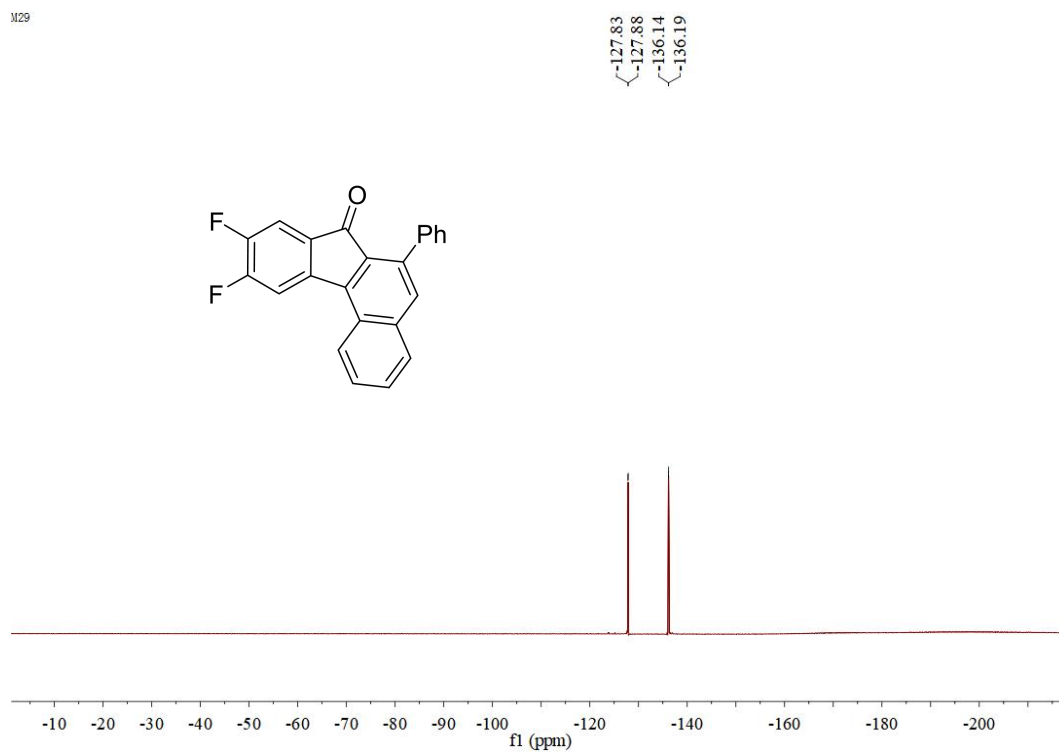

# <sup>1</sup>H NMR, <sup>13</sup>C NMR and <sup>19</sup>F NMR of 3o

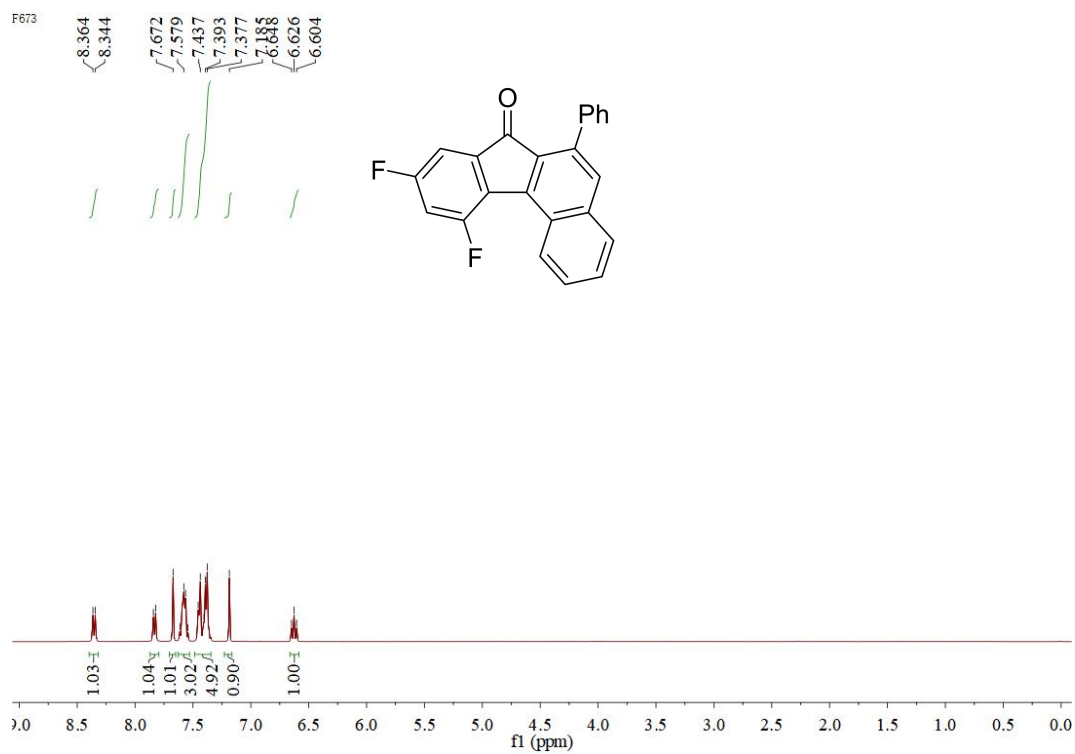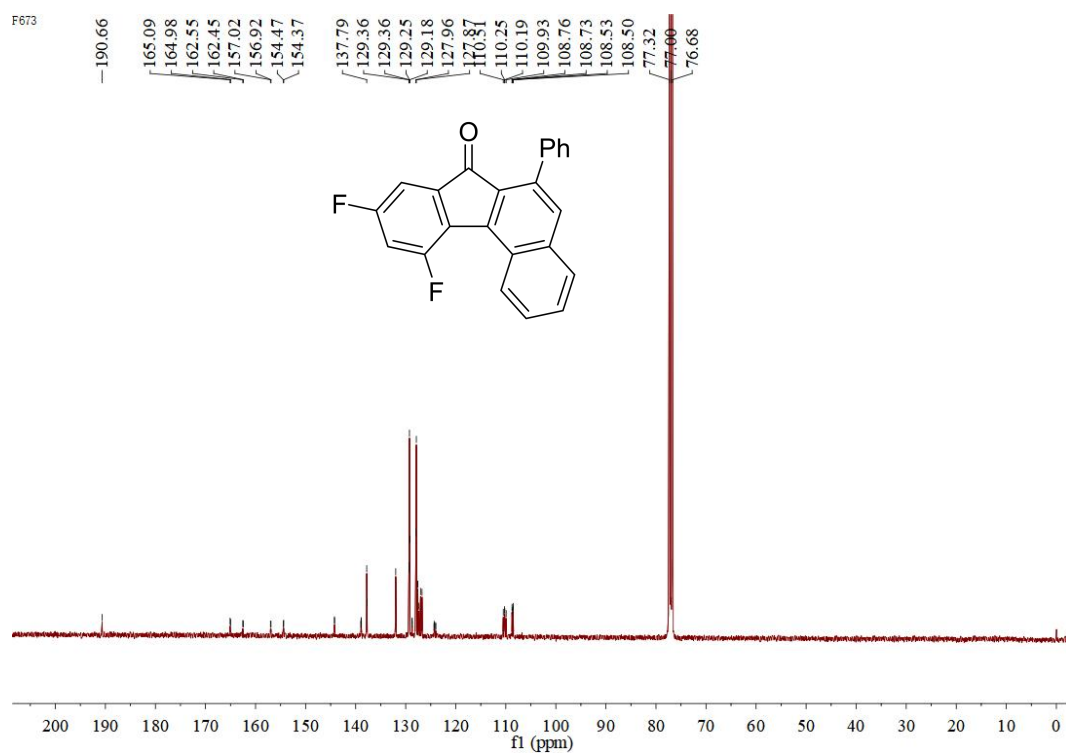

F673

-108.20  
-108.25  
-120.92  
-120.97

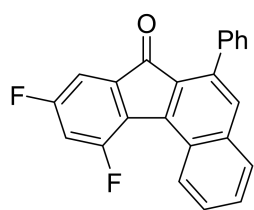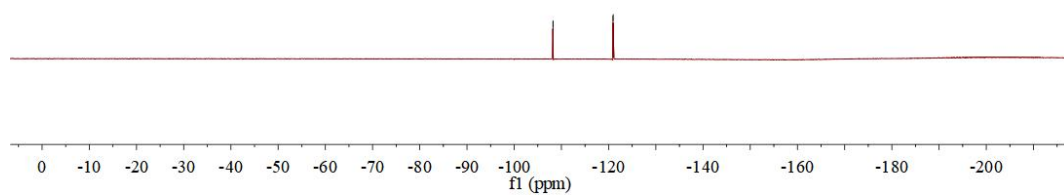

# <sup>1</sup>H NMR and <sup>13</sup>C NMR of 3p

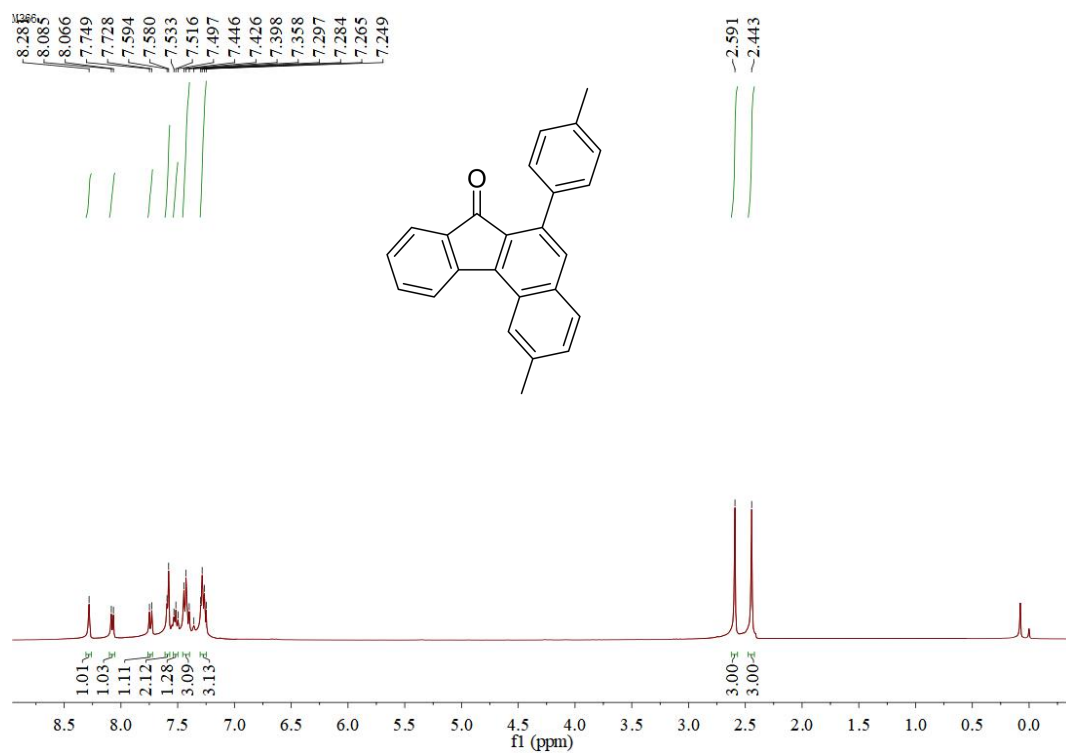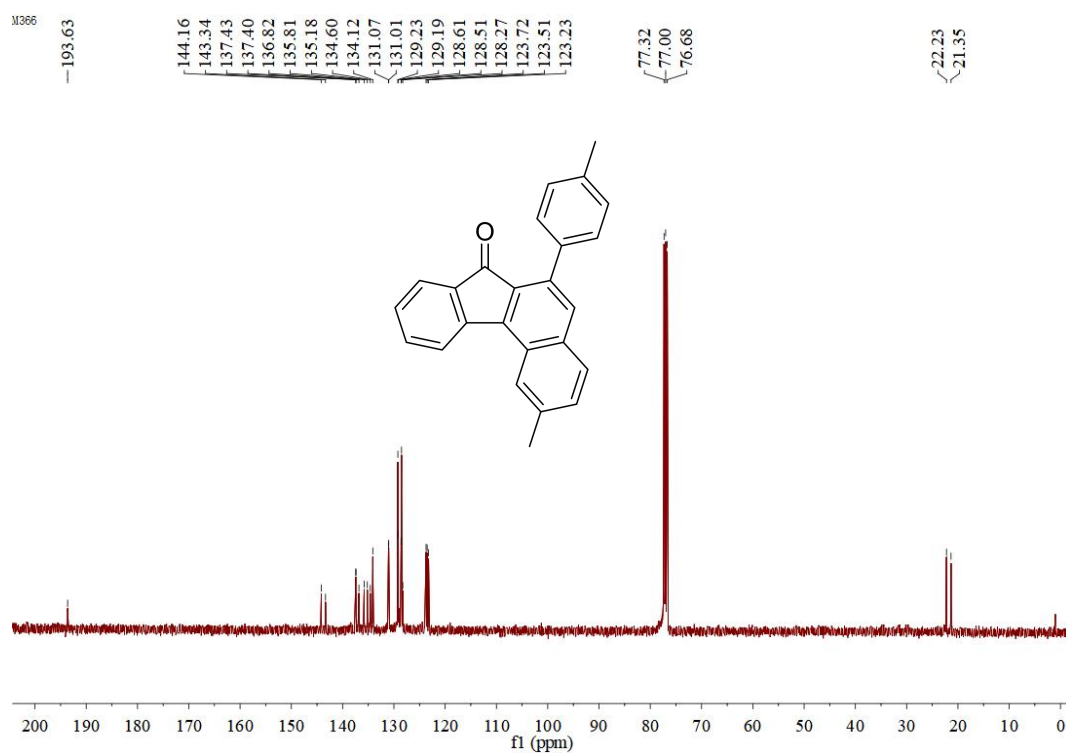



# <sup>1</sup>H NMR and <sup>13</sup>C NMR of 3q

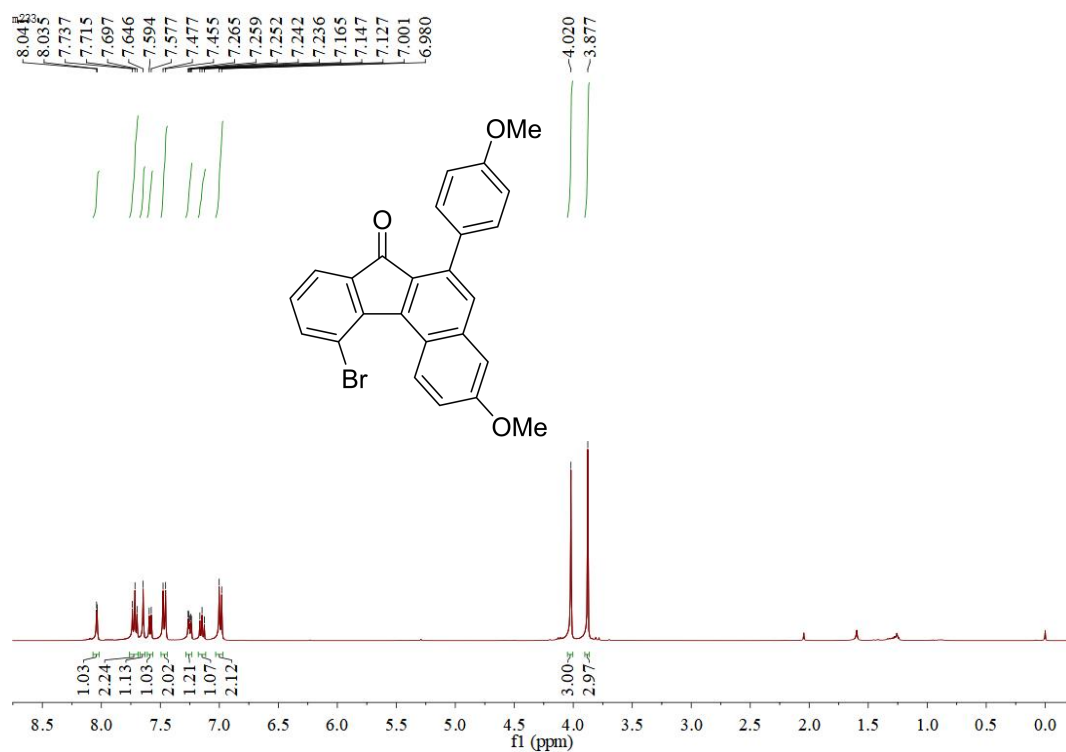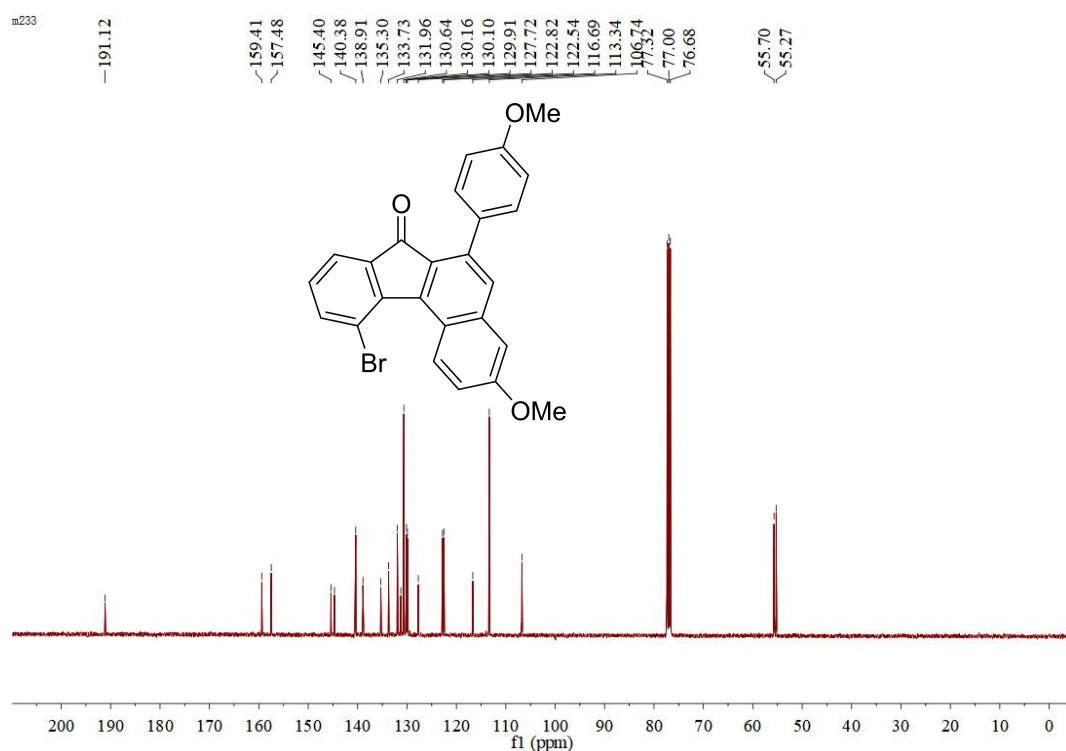

**$^1\text{H}$  NMR,  $^{13}\text{C}$  NMR and  $^{19}\text{F}$  NMR of 3r**

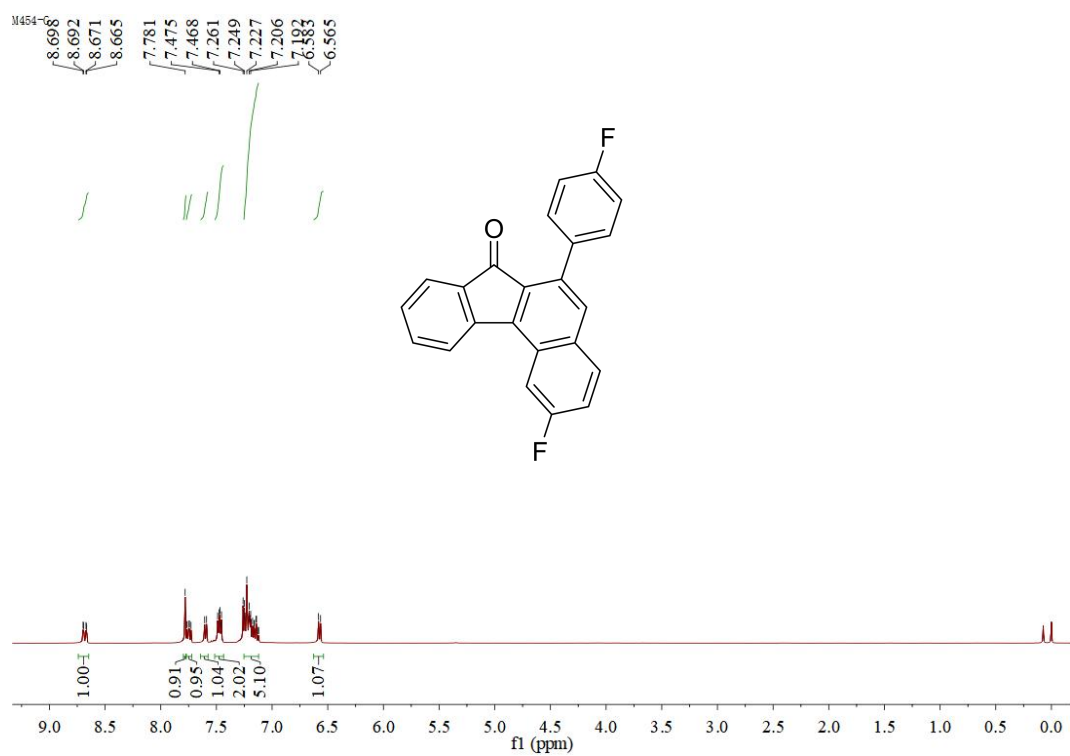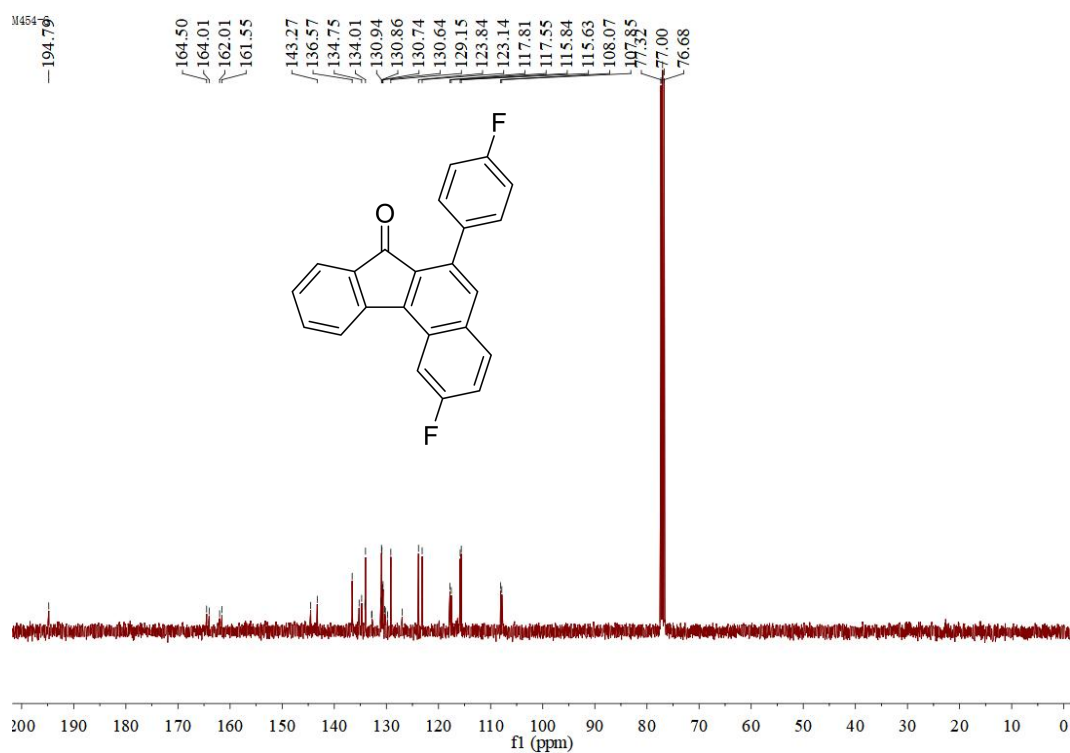

M454-G

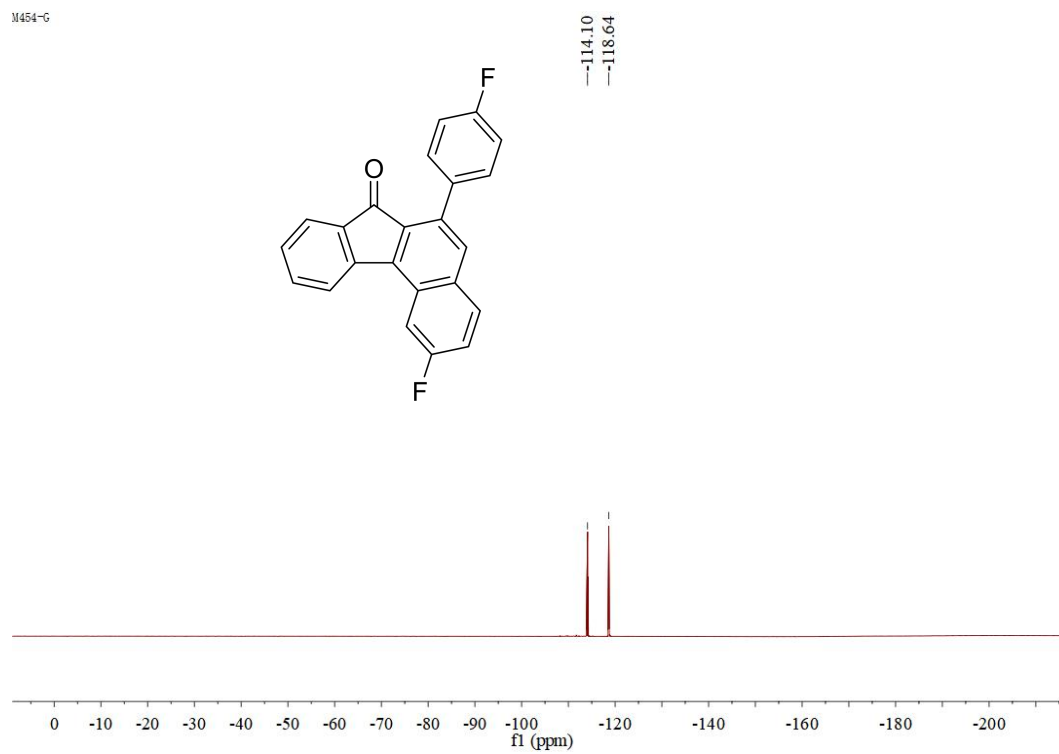

# <sup>1</sup>H NMR and <sup>13</sup>C NMR of 3s

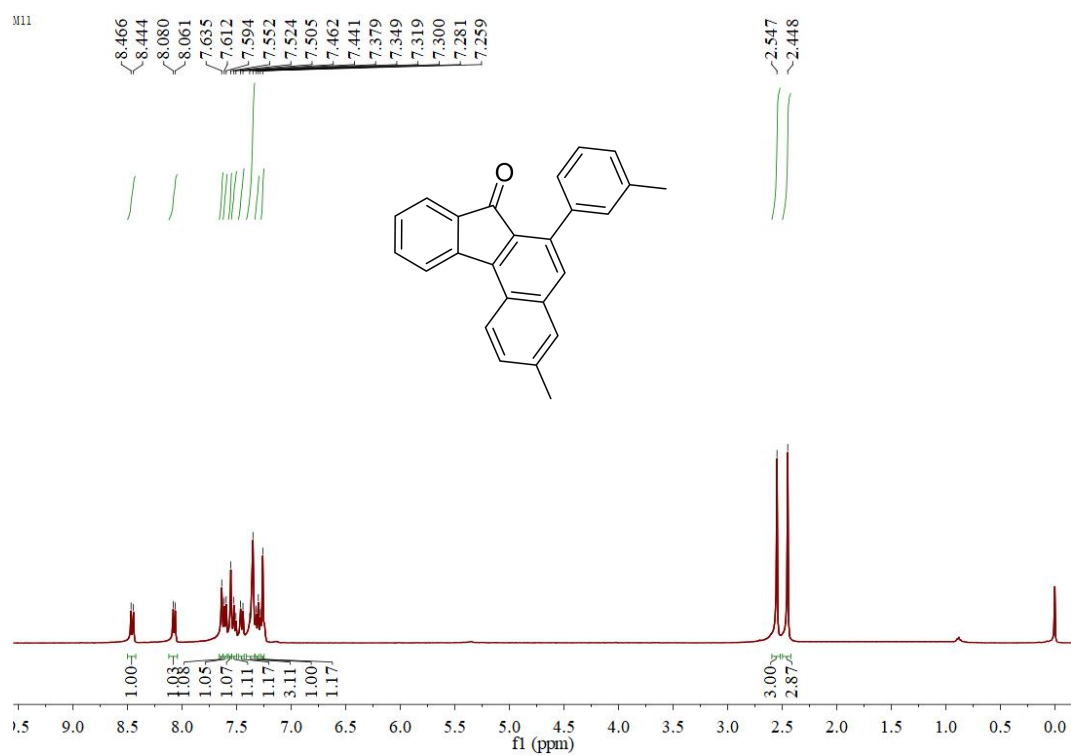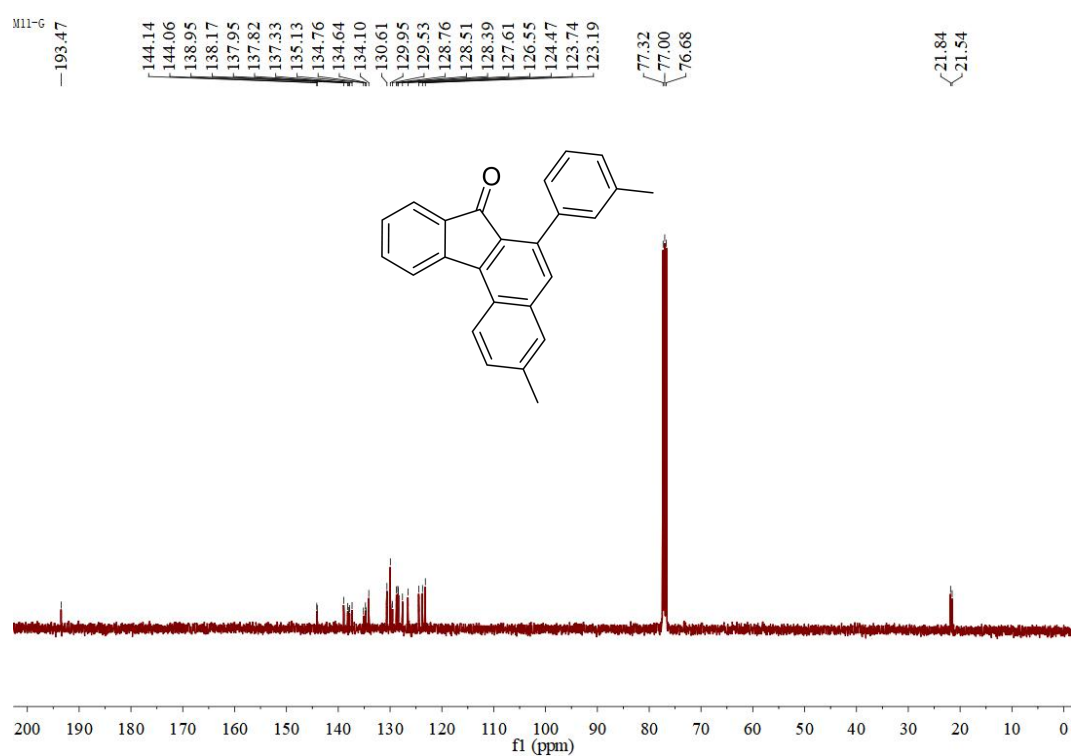

# <sup>1</sup>H NMR and <sup>13</sup>C NMR of 3t

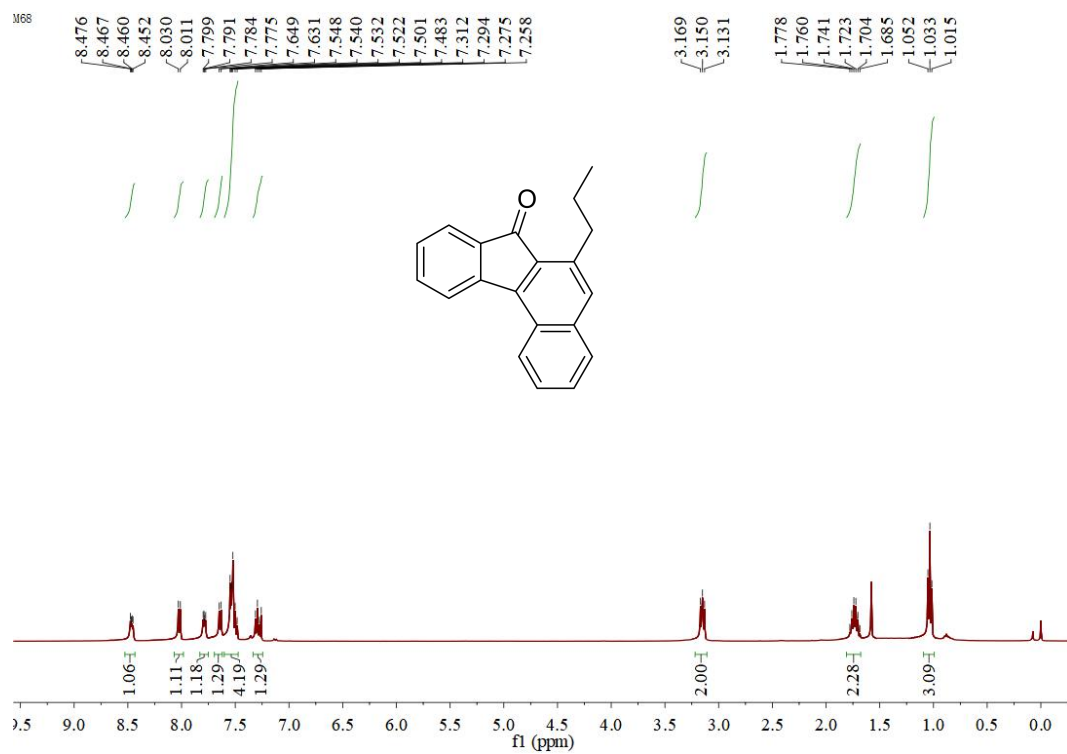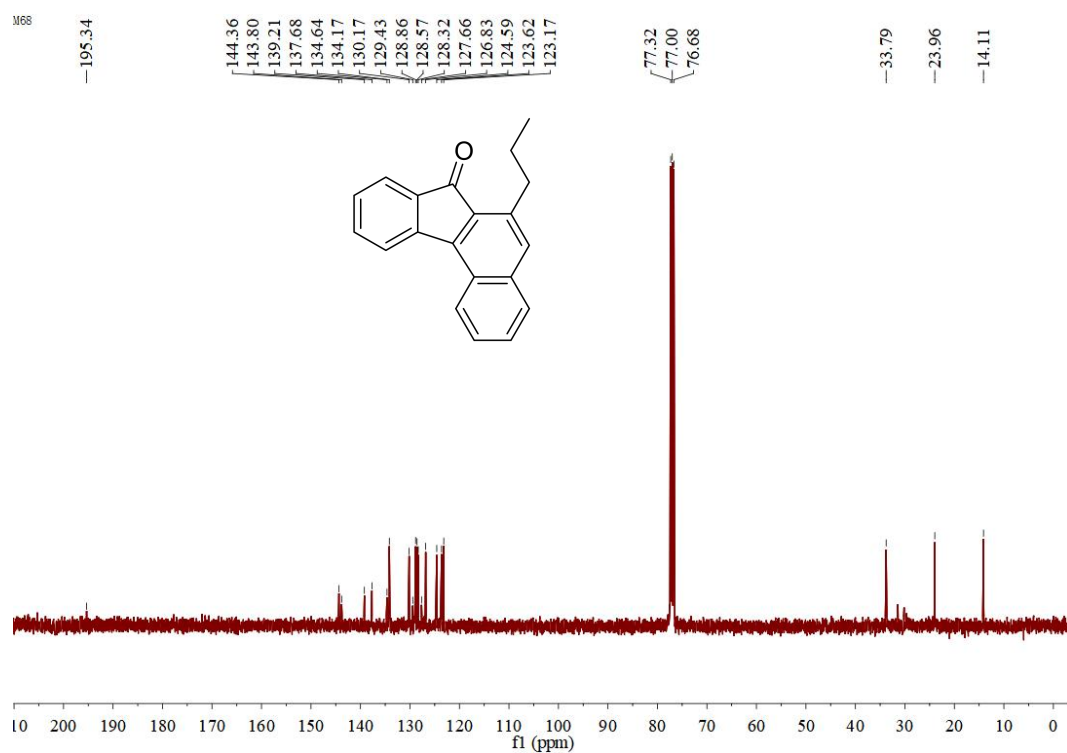

# <sup>1</sup>H NMR and <sup>13</sup>C NMR of mixture 3u and 3u'

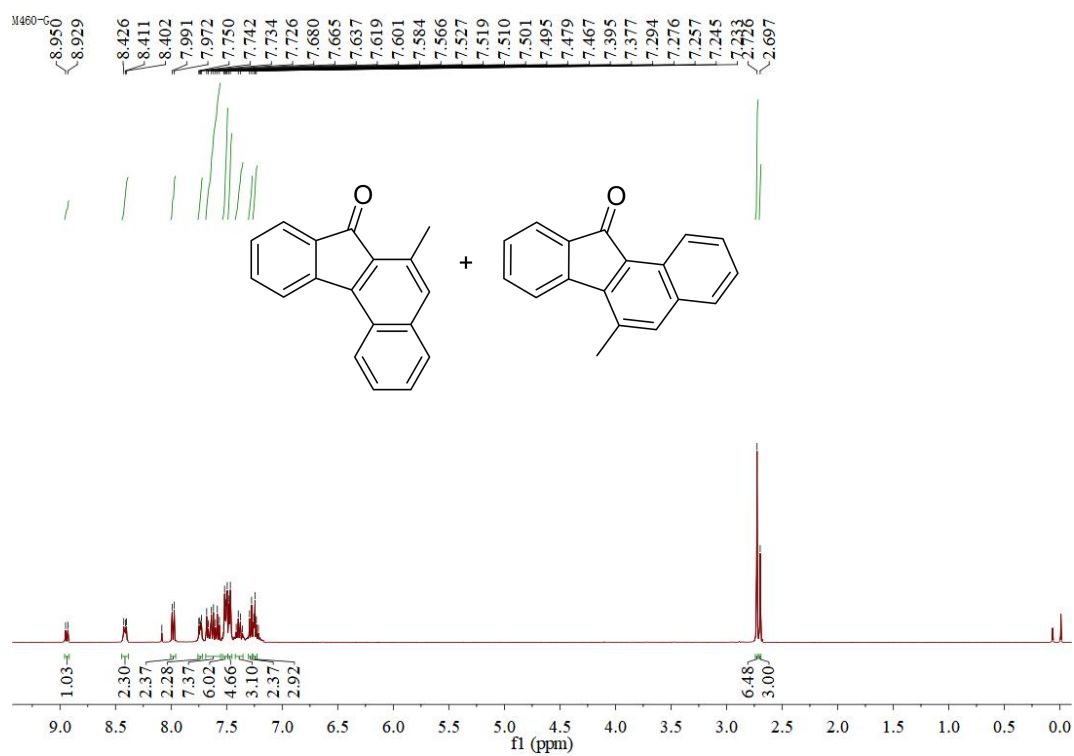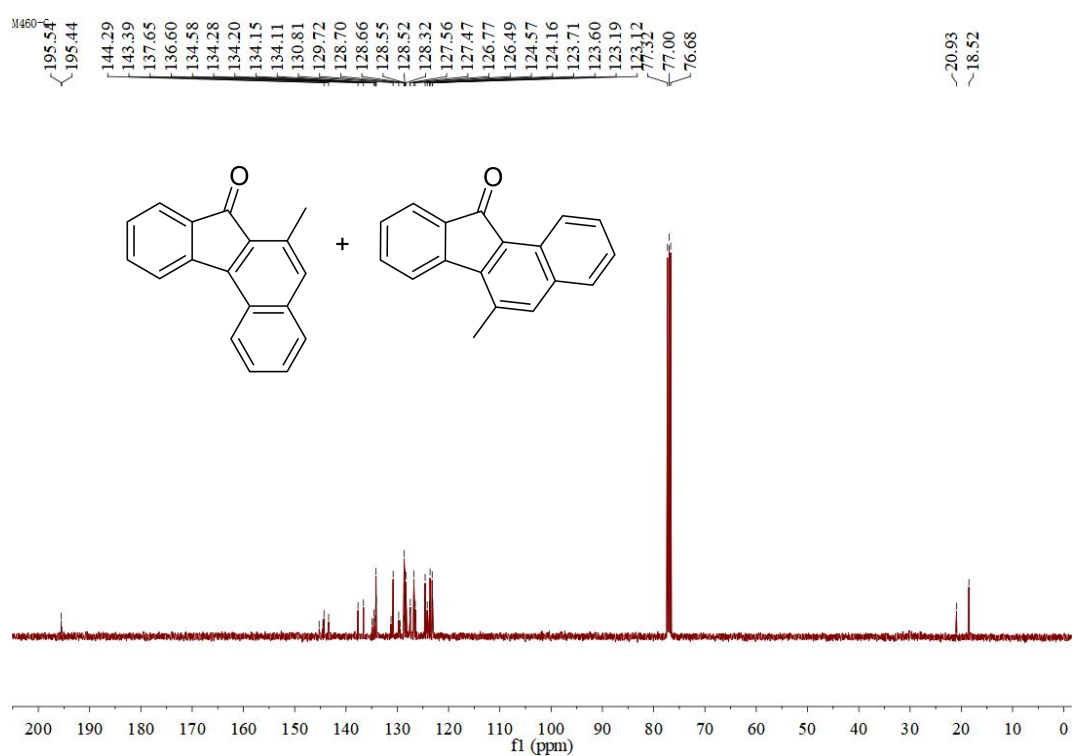

Supplement: d4cc06591c1.pdf [file d4cc06591c1.pdf]
